# Supplementary material for: Targeting the Central Pocket of the Pseudomonas aeruginosa Lectin LecA
Source: PubMed Central journal article supplement — Chembiochem. 2021 Dec 2;23(3):e202100563. doi: 10.1002/cbic.202100563 (PMC9300185; doi:10.1002/cbic.202100563), 2021-12-02
Supplement: CBIC-23-0-s001.pdf [file CBIC-23-0-s001.pdf]

# ChemBioChem

Supporting Information

## Targeting the Central Pocket of the *Pseudomonas aeruginosa* Lectin LecA

Eike Siebs, Elena Shanina, Sakonwan Kuhaudomlarp,  
Priscila da Silva Figueiredo Celestino Gomes, Cloé Fortin, Peter H. Seeberger, Didier Rognan,  
Christoph Rademacher, Anne Imberty, and Alexander Titz\*

|    |                                               |    |
|----|-----------------------------------------------|----|
| 32 | <b>Table of Contents</b>                      |    |
| 33 | <i>Chemical Synthesis</i>                     | 3  |
| 34 | <i>Molecular Dynamics</i>                     | 24 |
| 35 | <i>Isothermal Titration Calorimetry (ITC)</i> | 27 |
| 36 | <i><sup>19</sup>F PrOF NMR</i>                | 32 |
| 37 | <i>Surface Plasmon Resonance (SPR)</i>        | 33 |
| 38 | <i>X-Ray Crystallography</i>                  | 38 |
| 39 | <i>Reference</i>                              | 40 |
| 40 | <i>Spectra</i>                                | 41 |
| 41 |                                               |    |
| 42 |                                               |    |

## 43 **Chemical Synthesis**

### 44 **General information**

45 Chemicals and solvents were obtained from TCI Chemicals, Sigma Aldrich or Carl Roth and  
46 deuterated solvents from Eurisotop (Saarbrücken, Germany). Commercial chemicals were used  
47 without further purification. Reactions were monitored either by HPLC-MS or by TLC (silica gel  
48 60 Å coated aluminum plates, Macherey-Nagel, Düren, Germany) and visualization with UV light  
49 (254 nm) followed by staining with permanganate (1.5 g  $\text{KMnO}_4$ , 10 g,  $\text{K}_2\text{CO}_3$ , 1.25 mL  
50 10% NaOH in 200 mL  $\text{H}_2\text{O}$ ) or a molybdate solution (0.02 M  $\text{Ce}(\text{NH}_4)_4(\text{SO}_4)_4 \cdot 2\text{H}_2\text{O}$  and  
51  $(\text{NH}_4)_6\text{Mo}_7\text{O}_{24} \cdot 4\text{H}_2\text{O}$  in aq. 10%  $\text{H}_2\text{SO}_4$ ). MPLC was used for purification (Teledyne Isco  
52 CombiFlash Rf 200) using silica pore size 60 Å, particle size 400 mesh, from Fluka. The final test  
53 compounds were purified by preparative HPLC (Waters 2545 Binary Gradient Module, Waters  
54 2489 UV/Visible detector, C18 column (250/21 Nucleodur C18 Gravity-SB, 5  $\mu\text{m}$ , Macherey-  
55 Nagel, Germany). Purity of all test compounds was > 95% determined by HPLC-UV and/or  
56  $^1\text{H}$ -NMR. All synthesized compounds were analyzed by NMR (Bruker Avance III 500 UltraShield  
57 spectrometer) at 500 MHz for  $^1\text{H}$ -NMR and 126 MHz for  $^{13}\text{C}$ -NMR. The spectra were analyzed  
58 with MestReNova (Version 12.0.2) and chemical shifts were calibrated on residual solvent peaks  
59 as internal standard according to literature<sup>[1]</sup> ( $\text{CDCl}_3$  = 7.26 ppm and 77.0 ppm,  $\text{DMSO}-d_6$  =  
60 2.50 ppm and 39.52 and  $\text{MeOH}-d_4$  = 3.31 ppm and 49.00 ppm). Multiplicity is specified as s  
61 (singlet), d (doublet), t (triplet), q (quartet) or m (multiplet). Resonance assignment follows the  
62 numbering of galactose.

63 HPLC-MS was performed on a Thermo Dionex UltiMate 3000 HPLC coupled to a Bruker amaZon  
64 SL mass spectrometer and UV detection at 254 nm, using a C18 column (100/2 NucleoShell RP  
65 18plus, 2.7  $\mu\text{m}$  Macherey-Nagel, Germany) as stationary phase. High resolution MS was measured  
66 on a Bruker maxis 4G hr-QqTOF and analyzed using DataAnalysis (Bruker Daltonics, Bremen,  
67 Germany).

68

69 **4-Methyloxycarbonylphenyl 2,3,4,6-tetra-O-acetyl 1-thio- $\beta$ -D-galactopyranoside (S3)**

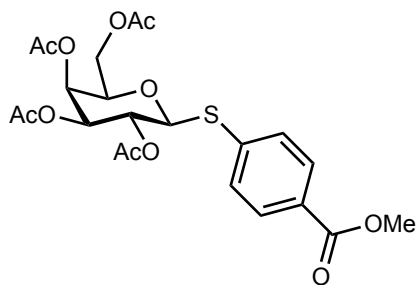

70  
71 The synthesis was performed in analogy to Winssinger *et al.*<sup>[2]</sup> Galactose pentaacetate (1.16 g,  
72 2.97 mmol, 1.0 eq.) and  $\text{BF}_3 \cdot \text{OEt}_3$  (4.0 eq.) were dissolved in  $\text{CH}_2\text{Cl}_2$  and methyl-4-  
73 sulfanylbenzoate (3.0 eq.) was added dropwise at 0 °C. The reaction was taken up in  $\text{CH}_2\text{Cl}_2$  after  
74 18 h, washed with  $\text{NaHCO}_3$  (2x – strong gas evolution), water and brine, the org. phase was dried  
75 over  $\text{Na}_2\text{SO}_4$ , filtered and the volatiles removed in vacuo. The residue was purified by flash  
76 chromatography (EtOAc/Tol 1:5,  $R_f = 0.4$ ). Compound **S3** was obtained as a white solid (1.37 g,  
77 2.75 mmol, 95%). The analytical data match the reported spectra in Kuhaudomlarp *et al.*<sup>[3]</sup>

78

79 **Azidoethyl derivative S5**

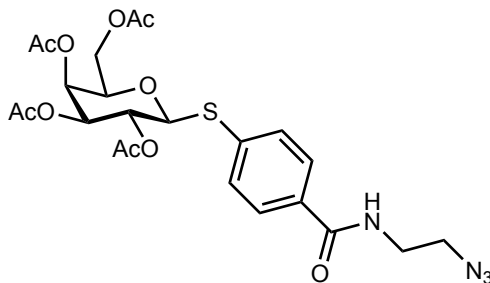

80  
81 Azidoethyl derivative **S5** was obtained following the procedure from Kuhaudomlarp *et al.* as a  
82 white solid.<sup>[3]</sup> (324 mg, 0.59 mmol, 57% o2s from **S3**). The employed 2-azido-ethylamine (**S4**)  
83 has an N/C ratio of 2 and is potentially explosive and must be handled with care.  $^1\text{H}$  NMR (500  
84 MHz,  $\text{DMSO-}d_6$ )  $\delta$  8.75 (s, 1H,  $\text{NH}$ ), 7.82 (d,  $J = 8.6$  Hz, 2H, 2x  $\text{ArCH}$ ), 7.52 (d,  $J = 8.5$  Hz, 2H,  
85 2x  $\text{ArCH}$ ), 5.38 (d,  $J = 10.0$  Hz, 1H, H-1), 5.35 (dd,  $J = 3.5, 1.1$  Hz, 1H, H-4), 5.28 (dd,  $J = 9.9,$   
86 3.5 Hz, 1H, H-3), 5.08 (t,  $J = 9.9$  Hz, 1H, H-2), 4.38 (td,  $J = 6.2, 1.1$  Hz, 1H, H-5), 4.07 (d,  $J = 6.2$   
87 Hz, 2H, H-6), 3.50 – 3.44 (m, 4H,  $\text{NHCH}_2\text{CH}_2\text{N}_3$ ), 2.13 (s, 3H,  $\text{CH}_3$ ), 2.04 (s, 2H,  $\text{CH}_3$ ), 2.01 (s,  
88 3H,  $\text{CH}_3$ ), 1.93 (s, 3H,  $\text{CH}_3$ ).  $^{13}\text{C}$  NMR (126 MHz,  $\text{DMSO-}d_6$ )  $\delta$  169.95 ( $\text{C=O}$ ), 169.88 ( $\text{C=O}$ ),  
89 169.48 ( $\text{C=O}$ ), 169.31 ( $\text{C=O}$ ), 165.83 ( $\text{C=O}$ ), 137.26 ( $\text{ArC}$ ), 132.52 ( $\text{ArC}$ ), 128.94 (2x  $\text{ArCH}$ ),  
90 127.75 (2x  $\text{ArCH}$ ), 83.09 (C-1), 73.63 (C-5), 70.97 (C-3), 67.57 (C-4), 66.79 (C-2), 61.81 (C-6),

91 49.77 (NHCH<sub>2</sub>CH<sub>2</sub>N<sub>3</sub>), 39.02 (NHCH<sub>2</sub>CH<sub>2</sub>N<sub>3</sub>), 20.52 (CH<sub>3</sub>), 20.50 (CH<sub>3</sub>), 20.42 (CH<sub>3</sub>), 20.35  
92 (CH<sub>3</sub>).

93

#### 94 Deprotected azidoethyl galactoside **S6**

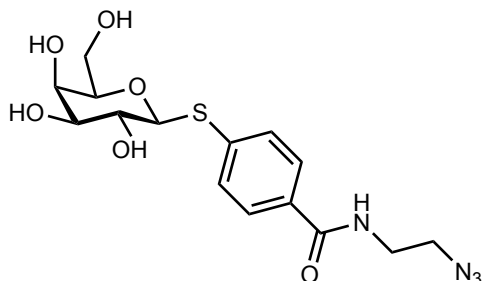

95

96 Deprotected azidoethyl galactoside **S6** was obtained as previously reported in good yields  
97 (176 mg, 0.45 mmol, 84%). The analytical data match the reported spectra in Kuhaudomlarp *et*  
98 *al.*<sup>[3]</sup>

99

#### 100 General procedure for phenoxy acetic acids

101 The reactions were performed in analogy to Anbarasa *et al.* and Dewei *et al.*<sup>[4,5]</sup> *p*-Cresol or 4-  
102 fluorophenol (1 g, 1.0 eq.) and NaOH (849 mg, 21.2 mmol, 2.2 eq.) were dissolved in water  
103 (15 mL). Then, a solution of chloroacetic acid (1.04 g, 11.1 mmol, 1.2 eq.) in water (3.5 mL) was  
104 added and the mixture was heated to 70 °C. After 16 h, the reaction was stopped by adding 2 M  
105 HCl and adjusting the pH to 1–2. The precipitate was collected and dried at 40 °C for 2 h. The  
106 products were purified by dissolution under basic conditions (pH = 8–9, K<sub>2</sub>CO<sub>3</sub> aq.) and repeated  
107 precipitation at pH = 1–2 (HCl aq.).

108

#### 109 2-(*p*-toloxy)acetic acid (**SI-1**)

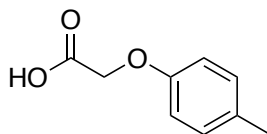

110

111 Compound **SI-1** was obtained as a white solid (1.03 g, 6.17 mmol, 67%). <sup>1</sup>H NMR (500 MHz,  
112 CDCl<sub>3</sub>) δ 7.11 (d, *J* = 8.0 Hz, 2H, 2x ArCH), 6.92 – 6.65 (m, 2H, 2x ArCH), 4.65 (s, 2H, CH<sub>2</sub>),  
113 2.30 (s, 3H, CH<sub>3</sub>). <sup>13</sup>C NMR (126 MHz, CDCl<sub>3</sub>) δ 172.97 (C=O), 155.33 (ArC), 131.76 (ArC),  
114 130.30 (2x ArCH), 114.67 (2x ArCH), 65.18 (CH<sub>2</sub>), 20.65 (CH<sub>3</sub>).

115

116 **2-(4-Fluorophenoxy)acetic acid (SI-2)**

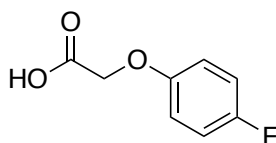

117

118 Compound **SI-2** was obtained as a white solid (518 mg, 6.17 mmol, 56%). <sup>1</sup>H NMR (500 MHz,  
119 CDCl<sub>3</sub>) δ 7.06 – 6.95 (m, 2H, 2x ArCH), 6.95-6.77 (2H, 2x ArCH), 4.66 (s, 2H, CH<sub>2</sub>). <sup>13</sup>C NMR  
120 (126 MHz, CDCl<sub>3</sub>) δ 172.51 (C=O), 158.04 (d, *J* = 240.4 Hz, ArCF), 153.50 (d, *J* = 2.5 Hz, ArC),  
121 116.28 (d, *J* = 33.4 Hz, 2x ArCH), 116.02 (d, *J* = 18.1 Hz, 2x ArCH), 65.51 (CH<sub>2</sub>).

122

123 **General procedure for phenylalkoxy acetic acids**

124 The synthesis was performed in analogy to Machin *et al.* [6]. The alcohol (1.0 g, 1.0 eq) was  
125 dissolved in DMF (final conc. = 0.5 M) and treated with NaH (2.0 eq.). This mixture was stirred  
126 at 60 °C until gas evolution stopped (15-30 min). Then, chloroacetic acid (1.0 eq.) dissolved in  
127 DMF (2 mL) was added carefully. This reaction was stirred at 60 °C for ca. 60 min. The solvent  
128 was removed under reduced pressure and the residue was taken up in H<sub>2</sub>O and washed with ether.  
129 The aq. phase was acidified with 2 N HCl (pH = 1) and extracted with EtOAc. The org. phase was  
130 dried over MgSO<sub>4</sub>, filtered and the solvent was removed in vacuo. The crude was purified by flash  
131 chromatography (PE/ EtOAc 7:3) to give the desired ethers (24–46%).

132

133 **2-Phenylethoxyacetic acid (SI-3)**

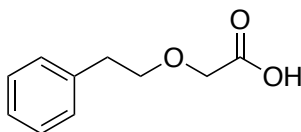

134

135 A white solid with fresh flower odor was obtained (684 mg, 3.79 mmol, 46%). <sup>1</sup>H NMR  
136 (500 MHz, DMSO-*d*<sub>6</sub>) δ 12.58 (s, 1H, COOH), 7.31 – 7.22 (m, 4H, 4x ArCH), 7.22 – 7.16 (m, 1H,  
137 ArCH), 4.00 (s, 2H, COCH<sub>2</sub>O), 3.67 (t, *J* = 7.0 Hz, 2H, PhCH<sub>2</sub>CH<sub>2</sub>O), 2.83 (t, *J* = 7.0 Hz, 2H,  
138 PhCH<sub>2</sub>CH<sub>2</sub>O). <sup>13</sup>C NMR (126 MHz, DMSO-*d*<sub>6</sub>) δ 171.66 (COOH), 138.80 (ArC), 128.81 (2x  
139 ArCH, 128.21 (2x ArCH, 126.05 (ArCH), 71.26 (PhCH<sub>2</sub>CH<sub>2</sub>O), 67.38 (COCH<sub>2</sub>O), 35.40  
140 (PhCH<sub>2</sub>CH<sub>2</sub>O). HR-MS (ESI): calcd. for **SI-3** [C<sub>10</sub>H<sub>12</sub>O<sub>3</sub> - H]<sup>-</sup> 179.0714; found 179.0705.

141

142 **3-Phenylpropoxyacetic acid (SI-4)**

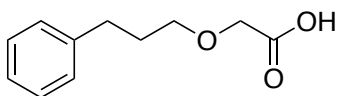

143  
144 **SI-4** was obtained as a white solid (452 mg, 2.23 mmol, 32%). <sup>1</sup>H NMR (500 MHz, DMSO-*d*<sub>6</sub>) δ  
145 12.57 (s, 1H, COOH), 7.27 (t, *J* = 7.5 Hz, 2H, 2x ArCH), 7.23 – 7.14 (m, 3H, 3x ArCH), 3.98 (s,  
146 2H, COCH<sub>2</sub>O), 3.45 (t, *J* = 6.4 Hz, 2H, PhCH<sub>2</sub>CH<sub>2</sub>CH<sub>2</sub>O), 2.66 – 2.59 (m, 2H, PhCH<sub>2</sub>CH<sub>2</sub>CH<sub>2</sub>O),  
147 1.84 – 1.76 (m, 2H, PhCH<sub>2</sub>CH<sub>2</sub>CH<sub>2</sub>O). <sup>13</sup>C NMR (126 MHz, DMSO-*d*<sub>6</sub>) δ 171.77 (COOH), 141.77  
148 (ArC), 128.31 (2x ArCH), 128.28 (2x ArCH), 125.72 (ArCH), 69.86 (PhCH<sub>2</sub>CH<sub>2</sub>CH<sub>2</sub>O), 67.43  
149 (COCH<sub>2</sub>O), 31.66 PhCH<sub>2</sub>CH<sub>2</sub>CH<sub>2</sub>O, 31.01 (PhCH<sub>2</sub>CH<sub>2</sub>CH<sub>2</sub>O). HR-MS (ESI): calcd. for **SI-4**  
150 [C<sub>11</sub>H<sub>14</sub>O<sub>3</sub> - H]<sup>-</sup> 193.0870; found 193.0860.

151

152 **4-Phenylbutoxyacetic acid (SI-6)**

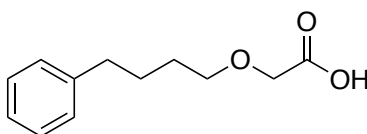

153  
154 Compound **SI-6** was obtained as an oil/white solid (330 mg, 1.58 mmol, 24%). <sup>1</sup>H NMR  
155 (500 MHz, DMSO-*d*<sub>6</sub>) δ 12.55 (s, 1H, COOH), 7.29 – 7.24 (m, 2H, 2x ArCH), 7.21 – 7.13 (m, 3H,  
156 3x ArCH), 3.95 (s, 2H, COCH<sub>2</sub>O), 3.45 (t, *J* = 6.4 Hz, 2H, PhCH<sub>2</sub>CH<sub>2</sub>CH<sub>2</sub>CH<sub>2</sub>O), 2.58 (t, *J* =  
157 7.6 Hz, 2H, PhCH<sub>2</sub>CH<sub>2</sub>CH<sub>2</sub>CH<sub>2</sub>O), 1.65 – 1.55 (m, 2H, PhCH<sub>2</sub>CH<sub>2</sub>CH<sub>2</sub>CH<sub>2</sub>O), 1.52 (tt, *J* = 8.3,  
158 6.2 Hz, 2H, PhCH<sub>2</sub>CH<sub>2</sub>CH<sub>2</sub>CH<sub>2</sub>O). <sup>13</sup>C NMR (126 MHz, DMSO-*d*<sub>6</sub>) δ 171.78 (COOH), 142.18  
159 (ArC), 128.30 (2x ArCH), 128.23 (2x ArCH), 125.64 (ArCH), 70.23 (PhCH<sub>2</sub>CH<sub>2</sub>CH<sub>2</sub>CH<sub>2</sub>O),  
160 67.40 (COCH<sub>2</sub>O), 34.83 (PhCH<sub>2</sub>CH<sub>2</sub>CH<sub>2</sub>CH<sub>2</sub>O), 28.70 (PhCH<sub>2</sub>CH<sub>2</sub>CH<sub>2</sub>CH<sub>2</sub>O), 27.61  
161 (PhCH<sub>2</sub>CH<sub>2</sub>CH<sub>2</sub>CH<sub>2</sub>O). HR-MS (ESI): calcd. for **SI-6** [C<sub>12</sub>H<sub>16</sub>O<sub>3</sub> - H]<sup>-</sup> 207.1027; found 207.1018.

162

163 **L-H-Pra-OMe \*HCl (S8)**

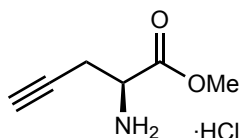

164  
165 The reaction was performed in analogy to Kristensen *et al.*<sup>[7]</sup> L-H-Pra-OH\*HCl (200 mg,  
166 1.77 mmol, 1.0 eq.) was suspended in MeOH (5 mL, final conc. 0.8 M) and thionyl chloride  
167 (150 μL, 1.2 eq.) was added dropwise over 15 min at 0 °C. The reaction was warmed to 25 °C and

168 stirred for 18 h. Volatiles were removed under reduced pressure and the residue was washed with  
169 Et<sub>2</sub>O and dried to obtain compound **S8** as an oil (283 mg, 1.73 mmol, 98%, *R<sub>f</sub>* = 0.74  
170 CH<sub>2</sub>Cl<sub>2</sub>/MeOH 9:1). <sup>1</sup>H NMR (500 MHz, CDCl<sub>3</sub>) δ 8.84 (s, 3H, NH<sub>3</sub>), 4.45 (s, 1H, H<sub>α</sub>), 3.88 (s,  
171 3H, CH<sub>3</sub>), 3.49 (s, 1H, C≡CH), 3.36 – 2.79 (m, 2H, CH<sub>2</sub>). <sup>13</sup>C NMR (126 MHz, CDCl<sub>3</sub>) δ 168.42  
172 (C=O), 76.35 (C≡CH), 74.72 C≡CH, 54.00 (CH<sub>α</sub>), 52.21 (CH<sub>3</sub>), 20.95 (CH<sub>3</sub>). LR-MS: calcd. **S8**  
173 [C<sub>6</sub>H<sub>9</sub>NO<sub>2</sub> + H]<sup>+</sup> 128.07; found 128.49.

174

### 175 L-H-Pra-NH(CH<sub>2</sub>)<sub>2</sub>OH\*HCl (**S9**)

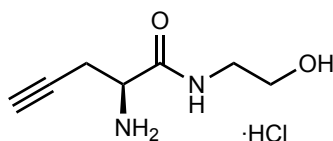

176

177 This reaction was performed in analogy to Kristensen *et al.*<sup>[7]</sup> L-H-Pra-OMe\* HCl (**S8**) (283 mg,  
178 1.73 mmol, 1.0 eq.) was dissolved in pure ethanolamine (1.8 mL, final conc. of **S8** = 1 M) and  
179 stirred for 18 h at 25 °C. The mixture was diluted with CH<sub>2</sub>Cl<sub>2</sub> and washed with aq. K<sub>2</sub>CO<sub>3</sub> (satd.),  
180 the aq. phase was extracted with CH<sub>2</sub>Cl<sub>2</sub> and the combined organic phases were dried over Na<sub>2</sub>SO<sub>4</sub>,  
181 filtered and the solvents were removed under reduced pressure. The obtained yellow oil was  
182 washed with Et<sub>2</sub>O and dried to give compound **S9** (233 mg, 1.21 mmol, 70%, *R<sub>f</sub>* = 0.56  
183 CH<sub>2</sub>Cl<sub>2</sub>/MeOH 8:2). <sup>1</sup>H NMR (500 MHz, DMSO-*d*<sub>6</sub>) δ 7.94 (br s, 1H, NH), 4.68 (br s, 1H, OH),  
184 3.40 (q, *J* = 5.9 Hz, 2H, NHCH<sub>2</sub>CH<sub>2</sub>OH), 3.31 – 3.24 (m, 1H, H<sub>α</sub>), 3.20 – 3.06 (m, 2H,  
185 NHCH<sub>2</sub>CH<sub>2</sub>OH), 2.83 (t, *J* = 2.6 Hz, 1H, C≡CH), 2.47 – 2.33 (m, 2H, CCH<sub>2</sub>CH<sub>α</sub>), 1.92 (s, 2H,  
186 NH<sub>2</sub>). <sup>13</sup>C NMR (126 MHz, DMSO-*d*<sub>6</sub>) δ 173.26 (C=O), 81.93 (C≡CH), 73.43 (C≡CH), 60.29  
187 (NHCH<sub>2</sub>CH<sub>2</sub>OH), 53.97 (CH<sub>α</sub>), 41.77 (NHCH<sub>2</sub>CH<sub>2</sub>OH), 25.25 (CCH<sub>2</sub>CH<sub>α</sub>). HR-MS (ESI): calcd.  
188 for **S9** [C<sub>7</sub>H<sub>12</sub>N<sub>2</sub>O<sub>2</sub> + H]<sup>+</sup> 157.0972; found 157.0972.

189

### 190 General procedure for the (S)-N-(2-hydroxyethyl)-2-(acetamido)pent-4-ynamides

191

192 The peptide couplings were performed in analogy as follows: L-H-Pra-NH(CH<sub>2</sub>)<sub>2</sub>OH (**S9**) (50 mg,  
193 0.32 mmol) was dissolved in DMF (final conc. of **S9** = 0.1 M) and EDC\*HCl (1.2 eq.), HOBt  
194 (1.2 eq.), the individual acids (2.0 eq.) and DIPEA (2.5 eq.) were added. The mixture was stirred  
195 at 25 °C for 24 h. The solvent was removed under reduced pressure and the crude was taken up in  
196 a mixture of EtOAc and 1 N HCl (1:1) and the phases were separated. The aq. phase was extracted



197 with EtOAc (2x). The combined org. phases were washed with NaHCO<sub>3</sub> (aq.), brine, dried over  
198 Na<sub>2</sub>SO<sub>4</sub>, filtered and concentrated under reduced pressure. The residue was purified by flash  
199 chromatography (CH<sub>2</sub>Cl<sub>2</sub>/MeOH) to give the products as white solids (36–71%).

200

201 **(S)-N-(2-hydroxyethyl)-2-(2-phenoxyacetamido)pent-4-ynamide (S10-a)**

202

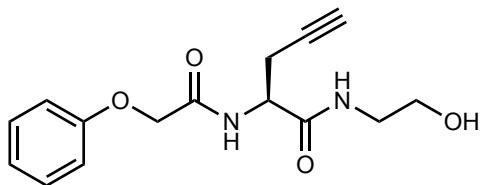

203

204 125 mg of **S9** (0.8 mmol) were used for the reaction and 1 eq. of phenoxyacetic acid. Different to  
205 the general procedure, the white precipitate containing the product was filtered and washed with  
206 Et<sub>2</sub>O to give compound **S10-1** (155 mg, 0.53 mmol, 67%, *R*<sub>f</sub> = 0.60 CH<sub>2</sub>Cl<sub>2</sub>/MeOH 9:1). <sup>1</sup>H NMR  
207 (500 MHz, CDCl<sub>3</sub>) δ 7.39 (d, *J* = 7.6 Hz, 1H, CHNHCO), 7.33 (dd, *J* = 8.7, 7.3 Hz, 2H, 2x ArCH),  
208 7.04 (td, *J* = 7.4, 1.1 Hz, 1H, ArCH), 6.98 – 6.90 (m, 2H, 2x ArCH), 6.57 (s, 1H, CONHCH<sub>2</sub>),  
209 4.62 (td, *J* = 7.5, 5.6 Hz, 1H, CH<sub>2</sub>CHNHCO), 4.56 (s, 2H, OCH<sub>2</sub>CO), 3.73 (t, *J* = 5.0 Hz, 2H,  
210 NHCH<sub>2</sub>CH<sub>2</sub>OH), 3.45 (t, *J* = 5.3 Hz, 2H, NHCH<sub>2</sub>CH<sub>2</sub>OH), 2.91 – 2.80 (m, 1H, CHCH<sub>2</sub>C≡CH),  
211 2.69 – 2.60 (m, 1H, CHCH<sub>2</sub>C≡CH), 2.10 (t, *J* = 2.6 Hz, 1H, C≡CH). <sup>13</sup>C NMR (126 MHz, CDCl<sub>3</sub>)  
212 δ 170.16 (C=O), 168.94 (C=O), 157.13 (ArC), 130.02 (2x ArCH), 122.51 (ArCH), 114.87 (2x  
213 ArCH), 79.16 CH<sub>2</sub>CCH, 72.18 (C≡CH), 67.34 (COCH<sub>2</sub>O), 61.99 (NHCH<sub>2</sub>CH<sub>2</sub>OH), 51.49  
214 (CH<sub>2</sub>CHNHCO), 42.64 (NHCH<sub>2</sub>CH<sub>2</sub>OH), 22.24 (CHCH<sub>2</sub>CCH). HR-MS (ESI): calcd. for **S10-1**  
215 [C<sub>15</sub>H<sub>19</sub>N<sub>2</sub>O<sub>4</sub> + H]<sup>+</sup> 291.1339; found 291.1337.

216

217 **(S)-2-(2-(benzyloxy)acetamido)-N-(2-hydroxyethyl)pent-4-ynamide (S10-b)**

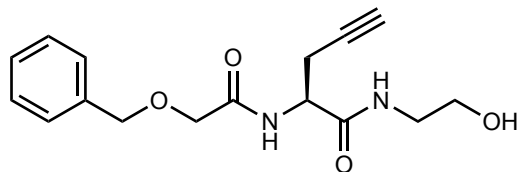

218

219 The crude product was purified by flash chromatography to give a yellow oily solid (48.6 mg,  
220 0.16 mmol, 50%, *R*<sub>f</sub> = 0.39; CH<sub>2</sub>Cl<sub>2</sub>/MeOH 19:1). <sup>1</sup>H NMR (500 MHz, DMSO-*d*<sub>6</sub>) δ 8.09 (t, *J* =  
221 5.7 Hz, 1H, CONHCH<sub>2</sub>), 7.84 (d, *J* = 8.3 Hz, 1H, CHNHCO), 7.38 (d, *J* = 4.4 Hz, 4H, 4x ArCH),  
222 7.35 – 7.29 (m, 1H, ArCH), 4.68 (t, *J* = 5.5 Hz, 1H, NHCH<sub>2</sub>CH<sub>2</sub>OH), 4.57 (d, *J* = 1.3 Hz, 2H,

223 COCH<sub>2</sub>O), 4.49 – 4.43 (m, 1H, CH<sub>2</sub>CHNHCO), 4.04 – 3.91 (m, 2H, OCH<sub>2</sub>Ar), 3.42 – 3.37 (m,  
224 2H, NHCH<sub>2</sub>CH<sub>2</sub>OH), 3.20 – 3.09 (m, 2H, NHCH<sub>2</sub>CH<sub>2</sub>OH), 2.86 (t, *J* = 2.6 Hz, 1H, HC≡C), 2.65  
225 – 2.53 (m, 2H, HCCCH<sub>2</sub>CH). <sup>13</sup>C NMR (126 MHz, DMSO-*d*<sub>6</sub>) δ 169.42 (C=O), 168.75 (C=O),  
226 137.56 (ArC), 128.37 (2x ArCH), 127.85 (2x ArCH), 127.76 (ArCH), 80.35 (HC≡CCH<sub>2</sub>), 73.15  
227 (HC≡C), 72.37 (COCH<sub>2</sub>O), 69.01 (OCH<sub>2</sub>Ar), 59.64 (NHCH<sub>2</sub>CH<sub>2</sub>OH), 50.49 (CH<sub>2</sub>CHNHCO),  
228 41.61 (NHCH<sub>2</sub>CH<sub>2</sub>OH), 22.16 (HC≡CCH<sub>2</sub>CH). HR-MS (ESI): calcd. for **S10-2** [C<sub>16</sub>H<sub>20</sub>N<sub>2</sub>O<sub>4</sub> +  
229 H]<sup>+</sup> 305.1496; found 305.1491.

230

231 **(S)-N-(2-hydroxyethyl)-2-(2-phenethoxyacetamido)pent-4-ynamide (S10-c)**

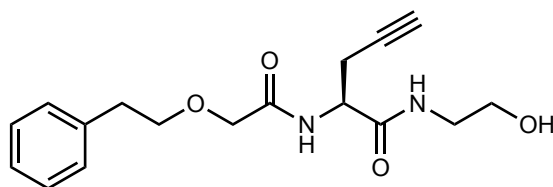

232

233 The product was obtained as a white powder (37 mg, 0.12 mmol, 36%, *R*<sub>f</sub> = 0.39; CH<sub>2</sub>Cl<sub>2</sub>/MeOH  
234 9:1). <sup>1</sup>H NMR (500 MHz, MeOH-*d*<sub>4</sub>) δ 7.31 – 7.25 (m, 4H, 4x ArCH), 7.23 – 7.16 (m 1H, ArCH),  
235 4.53 (td, *J* = 7.0, 5.8 Hz, 1H, CH<sub>2</sub>CHCONH), 4.06 – 3.92 (m, 2H, COCH<sub>2</sub>O), 3.77 (t, *J* = 6.8 Hz,  
236 2H, OCH<sub>2</sub>CH<sub>2</sub>Ph), 3.60 (td, *J* = 5.9, 1.5 Hz, 2H, NHCH<sub>2</sub>CH<sub>2</sub>OH), 3.33 (d, *J* = 5.9 Hz, 2H,  
237 NHCH<sub>2</sub>CH<sub>2</sub>OH), 2.94 (t, *J* = 6.8 Hz, 1H, OCH<sub>2</sub>CH<sub>2</sub>Ph), 2.74 – 2.54 (m, 2H, CHCH<sub>2</sub>C≡CH), 2.39  
238 (t, *J* = 2.6 Hz, 1H, C≡CH). <sup>13</sup>C NMR (126 MHz, MeOH-*d*<sub>4</sub>) δ 172.54 (C=O), 172.07 (C=O), 140.05  
239 (ArC), 130.07 (2x ArCH), 129.50 (2x ArCH), 127.35 (ArCH), 79.93 (CH<sub>2</sub>C≡CH), 73.78  
240 (OCH<sub>2</sub>CH<sub>2</sub>Ph), 72.60 (C≡CH), 70.84 (COCH<sub>2</sub>O), 61.40 (NHCH<sub>2</sub>CH<sub>2</sub>OH), 52.61 (NHCH<sub>2</sub>CH<sub>2</sub>OH),  
241 43.05 (NHCH<sub>2</sub>CH<sub>2</sub>OH), 37.10 (OCH<sub>2</sub>CH<sub>2</sub>Ph), 23.03 (CHCH<sub>2</sub>C≡CH). HR-MS (ESI): calcd. for  
242 **S10-3** [C<sub>17</sub>H<sub>22</sub>N<sub>2</sub>O<sub>4</sub> + H]<sup>+</sup> 319.165; found 347.1960.

243

244 **(S)-N-(2-hydroxyethyl)-2-(2-(3-phenylpropoxy)acetamido)pent-4-ynamide (S10-d)**

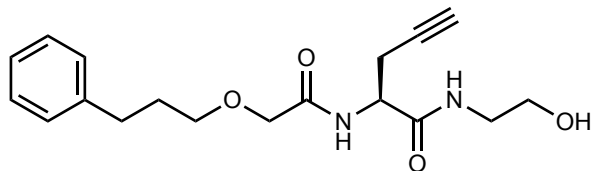

245

246 The product was obtained as a white powder (55 mg, 0.17 mmol, 52%, *R*<sub>f</sub> = 0.42; CH<sub>2</sub>Cl<sub>2</sub>/MeOH  
247 9:0.25). <sup>1</sup>H NMR (500 MHz, DMSO-*d*<sub>6</sub>) δ 8.08 (t, *J* = 5.7 Hz, 1H, NHCH<sub>2</sub>CH<sub>2</sub>OH), 7.74 (d, *J* =

248 8.3 Hz, 1H, CONHCH), 7.28 (t,  $J = 7.5$  Hz, 2H, 2x ArCH), 7.25 – 7.14 (m, 3H, 3x ArCH), 4.68  
 249 (t,  $J = 5.5$  Hz, 1H, NHCH<sub>2</sub>CH<sub>2</sub>OH), 4.48 – 4.41 (m, 1H, NHCH<sub>2</sub>CH<sub>2</sub>CO), 3.95 – 3.85 (m, 2H,  
 250 COCH<sub>2</sub>O), 3.47 (tt,  $J = 6.2, 3.1$  Hz, 2H, OCH<sub>2</sub>CH<sub>2</sub>CH<sub>2</sub>Ph), 3.43 – 3.35 (m, 2H, NHCH<sub>2</sub>CH<sub>2</sub>OH),  
 251 3.19 – 3.09 (m, 2H, NHCH<sub>2</sub>CH<sub>2</sub>OH), 2.83 (t,  $J = 2.6$  Hz, 1H, C≡CH), 2.70 – 2.62 (m, 2H,  
 252 OCH<sub>2</sub>CH<sub>2</sub>CH<sub>2</sub>Ph), 2.62 – 2.56 (m, 2H, CHCH<sub>2</sub>C≡CH), 1.90 – 1.81 (m, 2H, OCH<sub>2</sub>CH<sub>2</sub>CH<sub>2</sub>Ph).  
 253 <sup>13</sup>C NMR (126 MHz, DMSO-*d*<sub>6</sub>) δ 169.86 (C=O), 169.45 (C=O), 142.11 (ArC), 128.78 (4x ArCH),  
 254 126.22 (ArCH), 80.71 (CH<sub>2</sub>C≡CH), 73.55 (C≡CH), 70.61 (OCH<sub>2</sub>CH<sub>2</sub>CH<sub>2</sub>Ph), 70.03 (COCH<sub>2</sub>O),  
 255 60.10 (NHCH<sub>2</sub>CH<sub>2</sub>OH), 50.85 (NHCH<sub>2</sub>CH<sub>2</sub>CO), 42.07 (NHCH<sub>2</sub>CH<sub>2</sub>OH), 32.04  
 256 (OCH<sub>2</sub>CH<sub>2</sub>CH<sub>2</sub>Ph), 31.26 (OCH<sub>2</sub>CH<sub>2</sub>CH<sub>2</sub>Ph), 22.65 (CHCH<sub>2</sub>C≡CH). HR-MS (ESI): calcd. for  
 257 **S10-4** [C<sub>18</sub>H<sub>22</sub>N<sub>2</sub>O<sub>4</sub> + H]<sup>+</sup> 333.1809; found 333.1804.

258

259 **(S)-N-(2-hydroxyethyl)-2-(2-(4-phenylbutoxy)acetamido)pent-4-ynamide (S10-e)**

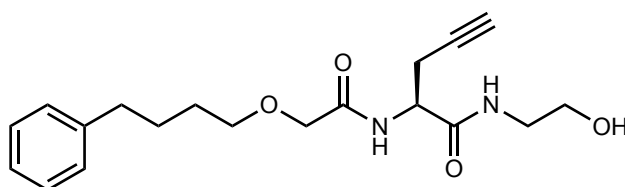

260

261 The product was obtained as a white powder (44.3, 0.13 mmol, 40%,  $R_f = 0.59$ ; CH<sub>2</sub>Cl<sub>2</sub>/MeOH  
 262 19:1). <sup>1</sup>H NMR (500 MHz, MeOH-*d*<sub>4</sub>) δ 7.23 (t,  $J = 7.6$  Hz, 2H, 2x ArCH), 7.20 – 7.15 (m, 2H,  
 263 2x ArCH), 7.15 – 7.09 (m, 1H, ArCH), 4.54 (t,  $J = 6.3$  Hz, 1H, CH<sub>2</sub>CHCONH), 4.01 – 3.90 (m,  
 264 2H, COCH<sub>2</sub>O), 3.60 – 3.57 (m, 2H, NHCH<sub>2</sub>CH<sub>2</sub>OH), 3.55 (t,  $J = 6.3$  Hz, 2H,  
 265 OCH<sub>2</sub>CH<sub>2</sub>CH<sub>2</sub>CH<sub>2</sub>Ph), 3.36 – 3.27 (m, 2H, NHCH<sub>2</sub>CH<sub>2</sub>OH), 2.71 – 2.66 (m, 2H, CHCH<sub>2</sub>C≡CH),  
 266 2.63 (t,  $J = 7.4$  Hz, 2H, OCH<sub>2</sub>CH<sub>2</sub>CH<sub>2</sub>CH<sub>2</sub>Ph), 2.31 (t,  $J = 2.7$  Hz, 1H, C≡CH), 1.77 – 1.68 (m,  
 267 2H, OCH<sub>2</sub>CH<sub>2</sub>CH<sub>2</sub>CH<sub>2</sub>Ph), 1.68 – 1.60 (m, 2H, OCH<sub>2</sub>CH<sub>2</sub>CH<sub>2</sub>CH<sub>2</sub>Ph). <sup>13</sup>C NMR (126 MHz,  
 268 MeOH-*d*<sub>4</sub>) δ 172.62 (C=O), 172.06 (C=O), 143.59 (ArC), 129.46 (2x ArCH), 129.30 (2x ArCH),  
 269 126.75 (ArCH), 79.86 (CH<sub>2</sub>C≡CH), 72.73 (C≡CH), 72.61 (OCH<sub>2</sub>CH<sub>2</sub>CH<sub>2</sub>CH<sub>2</sub>Ph), 70.82  
 270 (COCH<sub>2</sub>O), 61.39 (NHCH<sub>2</sub>CH<sub>2</sub>OH), 52.52 (CH<sub>2</sub>CHCONH), 43.05 (NHCH<sub>2</sub>CH<sub>2</sub>OH), 36.59  
 271 (OCH<sub>2</sub>CH<sub>2</sub>CH<sub>2</sub>CH<sub>2</sub>Ph), 30.13 (OCH<sub>2</sub>CH<sub>2</sub>CH<sub>2</sub>CH<sub>2</sub>Ph), 29.05 (OCH<sub>2</sub>CH<sub>2</sub>CH<sub>2</sub>CH<sub>2</sub>Ph), 23.09  
 272 (CHCH<sub>2</sub>CCH). HR-MS (ESI): calcd. for **S10-e** [C<sub>19</sub>H<sub>26</sub>N<sub>2</sub>O<sub>4</sub> + H]<sup>+</sup> 347.1965; found 347.1960.

273

274 **(S)-N-(2-hydroxyethyl)-2-(2-(p-tolyloxy)acetamido)pent-4-ynamide (S10-f)**

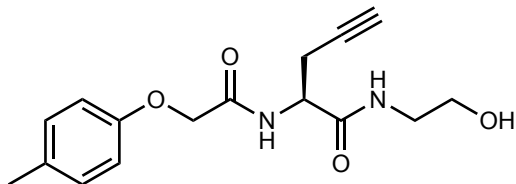

275  
 276 The product was obtained as a white solid (64.1 mg, 0.21 mmol, 71%,  $R_f = 0.28$ ;  $\text{CH}_2\text{Cl}_2/\text{MeOH}$   
 277 19:1).  $^1\text{H}$  NMR (500 MHz,  $\text{CDCl}_3$ )  $\delta$  7.39 (d,  $J = 7.6$  Hz, 1H,  $\text{CHNHCO}$ ), 7.12 (d,  $J = 8.5$  Hz, 2H,  
 278 2x  $\text{ArCH}$ ), 6.84 (d,  $J = 8.7$  Hz, 2H, 2x  $\text{ArCH}$ ), 6.58 (s, 1H,  $\text{CONHCH}_2$ ), 4.61 (td,  $J = 7.6, 5.6$  Hz,  
 279 1H,  $\text{CH}_2\text{CHNHCO}$ ), 4.52 (s, 2H,  $\text{COCH}_2\text{OAr}$ ), 3.72 (t,  $J = 4.9$  Hz, 2H,  $\text{NHCH}_2\text{CH}_2\text{OH}$ ), 3.44 (t,  
 280  $J = 5.2$  Hz, 1H,  $\text{NHCH}_2\text{CH}_2\text{OH}$ ), 2.91 – 2.59 (m, 2H,  $\text{HC}\equiv\text{CCH}_2\text{CH}$ ), 2.30 (s, 3H,  $\text{CH}_3$ ), 2.10 (d,  
 281  $J = 2.6$  Hz, 1H,  $\text{C}\equiv\text{CH}$ ).  $^{13}\text{C}$  NMR (126 MHz,  $\text{CDCl}_3$ )  $\delta$  170.22 ( $\text{C}=\text{O}$ ), 169.19 ( $\text{C}=\text{O}$ ), 155.05  
 282 ( $\text{ArCOR}$ ), 131.90 ( $\text{ArCCH}_3$ ), 130.41 (2x  $\text{ArCH}$ ), 114.69 (2x  $\text{ArCH}$ ), 79.14 ( $\text{HC}\equiv\text{CCH}_2$ ), 72.17  
 283 ( $\text{HC}\equiv\text{C}$ ), 67.47 ( $\text{COCH}_2\text{OAr}$ ), 61.95 ( $\text{NHCH}_2\text{CH}_2\text{OH}$ ), 51.44 ( $\text{CH}_2\text{CHNHCO}$ ), 42.63  
 284 ( $\text{NHCH}_2\text{CH}_2\text{OH}$ ), 22.17 ( $\text{HC}\equiv\text{CCH}_2$ ), 20.64 ( $\text{CH}_3$ ). HR-MS (ESI): calcd. for **S10-6** [ $\text{C}_{16}\text{H}_{20}\text{N}_2\text{O}_4 +$   
 285  $\text{H}$ ] $^+$  305.1496; found 305.1491.

286

287 **L-p-Fluorophenoxy-Pra-N(CH<sub>2</sub>)<sub>2</sub>OH (S10-g)**

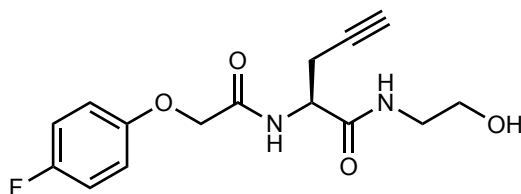

288  
 289 The compounds was obtained as a yellowish powder (64.1 mg, 0.21 mmol, 65%,  $R_f = 0.31$ ;  
 290  $\text{CH}_2\text{Cl}_2/\text{MeOH}$  19:1).  $^1\text{H}$  NMR (500 MHz,  $\text{MeOH-}d_4$ )  $\delta$  7.09 – 7.01 (m, 4H, 4x  $\text{ArCH}$ ), 4.67 –  
 291 4.61 (m, 1H,  $\text{CH}_2\text{CHNHCO}$ ), 4.59 (d,  $J = 3.8$  Hz, 2H,  $\text{COCH}_2\text{OAr}$ ), 3.62 (td,  $J = 5.9, 1.4$  Hz, 2H,  
 292  $\text{NHCH}_2\text{CH}_2\text{OH}$ ), 3.36 – 3.34 (m, 2H,  $\text{NHCH}_2\text{CH}_2\text{OH}$ ), 2.81 – 2.66 (m, 2H,  $\text{HC}\equiv\text{CCH}_2\text{CH}$ ), 2.40  
 293 (t,  $J = 2.7$  Hz, 1H,  $\text{HC}\equiv\text{C}$ ).  $^{13}\text{C}$  NMR (126 MHz,  $\text{MeOH-}d_4$ )  $\delta$  170.73 ( $\text{C}=\text{O}$ ), 169.59 ( $\text{C}=\text{O}$ ), 156.96  
 294 ( $\text{ArC}$ ), 154.00 ( $\text{ArC}$ ), 115.96 ( $\text{ArCH}$ ), 115.90 ( $\text{ArCH}$ ), 115.60 ( $\text{ArCH}$ ), 115.41 ( $\text{ArCH}$ ), 78.63  
 295 ( $\text{HC}\equiv\text{CCH}_2$ ), 71.08 ( $\text{HC}\equiv\text{C}$ ), 67.39 ( $\text{COCH}_2\text{OAr}$ ), 59.98 ( $\text{NHCH}_2\text{CH}_2\text{OH}$ ), 51.58 ( $\text{CH}_2\text{CHNHCO}$ ),  
 296 41.65 ( $\text{NHCH}_2\text{CH}_2\text{OH}$ ), 21.44 ( $\text{HC}\equiv\text{CCH}_2\text{CH}$ ). HR-MS (ESI): calcd. for **S10-7** [ $\text{C}_{15}\text{H}_{17}\text{FN}_2\text{O}_4 -$   
 297  $\text{H}$ ] $^-$  307.1100; found 307.1089.

298

299 **(S)-N-(2-hydroxyethyl)-2-(2-(naphthalen-2-yloxy)acetamido)pent-4-ynamide (S10-h)**

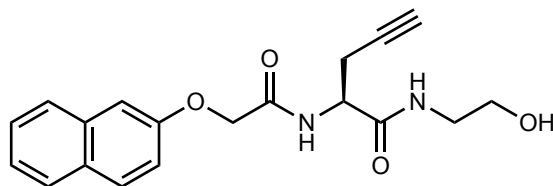

300  
 301 The product was obtained as a white powder (51.0 mg, 0.15 mmol, 47%,  $R_f = 0.19$ ; CH<sub>2</sub>Cl<sub>2</sub>/MeOH  
 302 19:1). <sup>1</sup>H NMR (500 MHz, MeOH-*d*<sub>4</sub>) δ 7.86 – 7.77 (m, 3H, 3x naphthyl-H), 7.46 (ddd,  $J = 8.2$ ,  
 303 6.8, 1.3 Hz, 1H, naphthyl-H), 7.37 (ddd,  $J = 8.1$ , 6.8, 1.3 Hz, 1H, naphthyl-H), 7.32 – 7.28 (m, 2H,  
 304 2x naphthyl-H), 4.75 (d,  $J = 3.4$  Hz, 2H, COCH<sub>2</sub>OR), 4.70 – 4.62 (m, 1H, CH<sub>2</sub>CHNHCO), 3.60  
 305 (td,  $J = 5.9$ , 1.5 Hz, 2H, NHCH<sub>2</sub>CH<sub>2</sub>OH), 3.38 – 3.34 (m, 2H, NHCH<sub>2</sub>CH<sub>2</sub>OH), 2.88 – 2.62 (m,  
 306 2H, HC≡CCH<sub>2</sub>CH), 2.36 (s, 1H, HC≡C). <sup>13</sup>C NMR (126 MHz, MeOH-*d*<sub>4</sub>) δ 170.76 (C=O), 169.66  
 307 (C=O), 155.51 (naphthyl-C), 134.49 (naphthyl-C), 129.58 (naphthyl-C), 129.32 (naphthyl-CH),  
 308 127.23 (naphthyl-CH), 126.64 (naphthyl-CH), 126.17 (naphthyl-CH), 123.79 (naphthyl-CH),  
 309 118.12 (naphthyl-CH), 107.18 (naphthyl-CH), 78.63 HC≡CCH<sub>2</sub>, 71.06 HC≡C, 66.74 (COCH<sub>2</sub>Ar),  
 310 59.97 (NHCH<sub>2</sub>CH<sub>2</sub>OH), 51.63 (CH<sub>2</sub>CHNHCO), 41.65 (NHCH<sub>2</sub>CH<sub>2</sub>OH), 21.45 (HC≡CCH<sub>2</sub>CH).  
 311 HR-MS (ESI): calcd. for **S10-8** [C<sub>19</sub>H<sub>20</sub>N<sub>2</sub>O<sub>4</sub> + H]<sup>+</sup> 341.1496; found 341.1491.

312

313 **(S)-N-(2-hydroxyethyl)-2-(2-(2-hydroxyphenyl)acetamido)pent-4-ynamide (S10-i)**

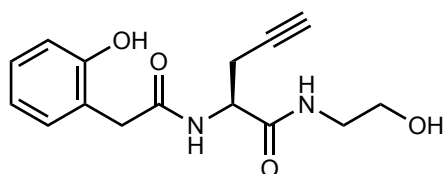

314  
 315 The product was obtained as a white powder (38.7 mg, 0.13 mmol, 42%,  $R_f = 0.17$ ; CH<sub>2</sub>Cl<sub>2</sub>/MeOH  
 316 19:1). <sup>1</sup>H NMR (500 MHz, DMSO-*d*<sub>6</sub>) δ 9.64 (s, 1H, ArOH), 8.17 (d,  $J = 8.1$  Hz, 1H, CHNHCO),  
 317 8.00 (t,  $J = 5.8$  Hz, 1H, CONHCH<sub>2</sub>), 7.11 – 7.05 (m, 1H, ArCH), 7.05 – 7.01 (m, 1H, ArCH), 6.81  
 318 – 6.76 (m, 1H, ArCH), 6.76 – 6.70 (m, 1H, ArCH), 4.68 (t,  $J = 5.3$  Hz, 1H, CH<sub>2</sub>OH), 4.39 (td,  $J =$   
 319 7.6, 5.9 Hz, 1H, CH<sub>2</sub>CHNHCO), 3.51 – 3.41 (m, 2H, COCH<sub>2</sub>Ar), 3.41 – 3.36 (m, 2H,  
 320 NHCH<sub>2</sub>CH<sub>2</sub>OH), 3.19 – 3.06 (m, 2H, NHCH<sub>2</sub>CH<sub>2</sub>OH), 2.81 (t,  $J = 2.6$  Hz, 1H, HC≡C), 2.57 –  
 321 2.41 (m, 2H, HC≡CCH<sub>2</sub>CH). <sup>13</sup>C NMR (126 MHz, DMSO-*d*<sub>6</sub>) δ 171.29 (C=O), 170.16 (C=O),  
 322 155.86 (ArC), 131.12 (ArCH), 128.15 (ArCH), 122.95 (ArC), 119.30 (ArCH), 115.58 (ArCH),  
 323 80.98 HC≡CCH<sub>2</sub>, 73.41 (HC≡C), 60.11 (NHCH<sub>2</sub>CH<sub>2</sub>OH), 51.95 (CH<sub>2</sub>CHNHCO), 42.00

324 (NHCH<sub>2</sub>CH<sub>2</sub>OH), 37.49 (COCH<sub>2</sub>Ar), 22.47 (HCCCH<sub>2</sub>CH). HR-MS (ESI): calcd. for **S10-9**  
325 [C<sub>15</sub>H<sub>18</sub>N<sub>2</sub>O<sub>4</sub> - H]<sup>-</sup> 289.1194; found 289.1185.

326

### 327 **General procedure for the copper(I)-catalyzed assembly of LecA inhibitors**

328 Alkyne (1.3 eq) and azide (1.0 eq) were dissolved to 0.1 M in degassed DMF. CuSO<sub>4</sub> (0.5 eq. of a  
329 100 mM stock in degassed H<sub>2</sub>O) and sodium ascorbate (0.5 eq. of a 100 mM stock in degassed  
330 H<sub>2</sub>O) were added and the mixture was stirred for 16 h at r.t. . The mixture was diluted with EtOAc  
331 and washed with water. The aq. phase was extracted with EtOAc (3x). The combined org. phases  
332 were dried over Na<sub>2</sub>SO<sub>4</sub>, concentrated and the residue was purified by preparative-HPLC (C18,  
333 ACN/H<sub>2</sub>O with 0.1% formic acid, 5–65% ACN) and fractions containing the product were  
334 subsequently lyophilized (yields ranged from 73–92%).

335

### 336 **Phenoxy-modified galactoside 1**

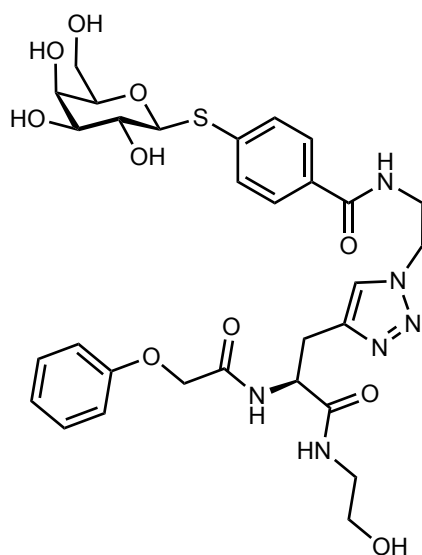

337

338 The product was obtained as a white solid (36 mg, 0.043 mmol, 50%, *R*<sub>f</sub> = 0.53; CH<sub>2</sub>Cl<sub>2</sub>/MeOH  
339 19:1). <sup>1</sup>H NMR (500 MHz, DMSO-*d*<sub>6</sub>) δ 8.56 (t, *J* = 5.7 Hz, 1H, (NH)CH<sub>2</sub>CH<sub>2</sub>triazole), 8.18 (d, *J*  
340 = 8.2 Hz, 1H, CHNHCO), 8.01 (t, *J* = 5.7 Hz, 1H, NHCH<sub>2</sub>CH<sub>2</sub>OH), 7.74 (s, 1H, triazole-H), 7.71  
341 (d, *J* = 8.4 Hz, 2H, 2x SArCH), 7.48 (d, *J* = 8.5 Hz, 2H, 2x SArCH), 7.28 (dd, *J* = 8.7, 7.2 Hz, 2H,  
342 2x OArCH), 6.96 (t, *J* = 7.3 Hz, 1H, OArCH), 6.90 (d, *J* = 8.2 Hz, 2H, 2x OArCH), 5.22 (d, *J* =  
343 5.9 Hz, 1H, OH-2), 4.93 (d, *J* = 5.5 Hz, 1H, OH-3?), 4.69 (d, *J* = 9.5 Hz, 1H, H-1), 4.66 (s, 1H,  
344 OH-4), 4.57 – 4.50 (m, 2H, CH<sub>2</sub>CHNHCO, OH-4?), 4.49 (d, *J* = 2.6 Hz, 2H, COCH<sub>2</sub>O), 4.46 (t, *J*

345 = 6.2 Hz, 2H, NHCH<sub>2</sub>CH<sub>2</sub>triazol), 3.72 (t, *J* = 3.8 Hz, 1H, H-4?), 3.69 – 3.55 (m, 2H,  
 346 NHCH<sub>2</sub>CH<sub>2</sub>triazol), 3.57 – 3.42 (m, 4H, H-2, H-3?, NHCH<sub>2</sub>CH<sub>2</sub>OH), 3.41 – 3.34 (m, 3H, H-5?,  
 347 H-6), 3.18 – 3.10 (m, 1H, 1x triazoleCH<sub>2</sub>CH), 3.10 – 3.02 (m, 1H, NHCH<sub>2</sub>CH<sub>2</sub>OH), 2.98 (dd, *J* =  
 348 14.7, 8.1 Hz, 1H, 1x triazoleCH<sub>2</sub>CH). <sup>13</sup>C NMR (126 MHz, DMSO-*d*<sub>6</sub>) δ 170.22 (C=O), 167.55  
 349 (C=O), 166.08 (C=O), 157.63 OArC, 142.65 (SArC), 140.15 (SArC), 131.13 (triazole-C), 129.49  
 350 (2x OArCH), 127.73 (2x SArCH), 127.57 (2x SArCH), 123.14 (triazole-CH), 121.17 (OArCH),  
 351 114.64 (2x OArCH), 86.67 (C-1), 79.28 (C-5), 74.66 (C-3)), 69.12 (C-2), 68.37 (C-4), 66.60  
 352 (COCH<sub>2</sub>O), 60.59 (NHCH<sub>2</sub>CH<sub>2</sub>OH), 59.60 (C-6), 52.15 (CH<sub>2</sub>CHNHCO), 48.51  
 353 (NHCH<sub>2</sub>CH<sub>2</sub>triazole), 41.56 (NHCH<sub>2</sub>CH<sub>2</sub>OH), 39.35 (NHCH<sub>2</sub>CH<sub>2</sub>triazole), 28.31  
 354 (triazoleCH<sub>2</sub>CH). HRMS (ESI) calcd. for **1** [C<sub>30</sub>H<sub>38</sub>N<sub>6</sub>O<sub>10</sub>S + H]<sup>+</sup> 675.2443; found, 675.2437.

355

### 356 Benzyloxy-modified galactoside **2**

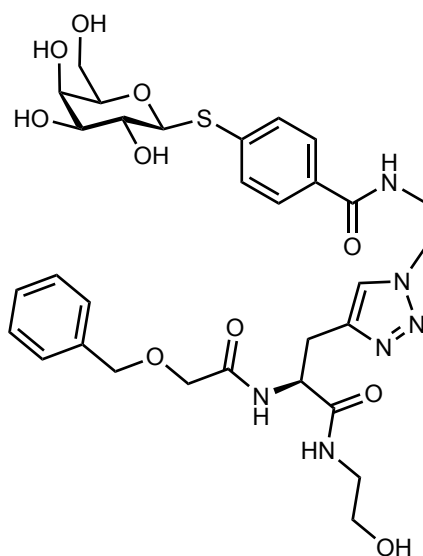

357

358 The product was obtained as a white powder (21.3 mg, 0.031 mmol, 80%, *R*<sub>f</sub> = 0.23;  
 359 CH<sub>2</sub>Cl<sub>2</sub>/MeOH 19:1). <sup>1</sup>H NMR (500 MHz, DMSO-*d*<sub>6</sub>) δ 8.56 (t, *J* = 5.7 Hz, 1H,  
 360 NHCH<sub>2</sub>CH<sub>2</sub>triazole), 8.03 (t, *J* = 5.7 Hz, 1H, NHCH<sub>2</sub>CH<sub>2</sub>OH), 7.83 (d, *J* = 8.2 Hz, 1H, CHNHCO),  
 361 7.80 (s, 1H, triazole-H), 7.73 – 7.69 (m, 2H, 2x SArCH), 7.50 – 7.46 (m, 2H, 2x SArCH), 7.38 –  
 362 7.27 (m, 5H, 5x ArCH), 5.22 (d, *J* = 6.1 Hz, 1H, OH-2), 4.93 (d, *J* = 5.6 Hz, 1H, OH-3), 4.76 –  
 363 4.63 (m, 3H, H-1, OH-4, NHCH<sub>2</sub>CH<sub>2</sub>OH), 4.56 – 4.51 (m, 2H, OH-6?, CH<sub>2</sub>CHCO), 4.49 (d, *J* =  
 364 0.9 Hz, 2H, COCH<sub>2</sub>O), 4.47 (t, *J* = 6.3 Hz, 2H, NHCH<sub>2</sub>CH<sub>2</sub>triazole), 3.94 – 3.84 (m, 2H, OCH<sub>2</sub>Ar),  
 365 3.72 (t, *J* = 4.0 Hz, 1H, H-4), 3.69 – 3.56 (m, 2H, NHCH<sub>2</sub>CH<sub>2</sub>triazole), 3.56 – 3.43 (m, 4H, H-2,  
 366 H-3, NHCH<sub>2</sub>CH<sub>2</sub>OH), 3.40 – 3.36 (m, 3H, H-5?, H-6?), 3.19 – 3.11 (m, 1H, 1x triazoleCH<sub>2</sub>CH),

367 3.11 – 3.03 (m, 2H, NHCH<sub>2</sub>CH<sub>2</sub>OH), 2.99 (dd, *J* = 14.7, 7.7 Hz, 1H, 1x triazoleCH<sub>2</sub>CH). <sup>13</sup>C NMR  
 368 (126 MHz, DMSO-*d*<sub>6</sub>) δ 170.25 (C=O), 168.78 NHCOCH<sub>2</sub>O, 166.12 (C=O), 142.61 (SArC),  
 369 140.20 (SArC), 137.62 (ArC), 131.14 (triazole-C), 128.34 (2x ArCH), 127.78 (2x ArCH), 127.74  
 370 (ArCH), 127.71 (2x SArCH), 127.61 (2x SArCH), 123.24 (triazole-CH), 86.68 (C-1), 79.30 (C-5),  
 371 74.68 (C-3), 72.32 (OCH<sub>2</sub>Ar), 69.14 (C-2), 69.05 (COCH<sub>2</sub>O), 68.41 (C-4), 60.63  
 372 (NHCH<sub>2</sub>CH<sub>2</sub>OH), 59.63 (C-6), 51.90 (CH<sub>2</sub>CHNHCO), 48.51 (NHCH<sub>2</sub>CH<sub>2</sub>triazole), 41.58  
 373 (NHCH<sub>2</sub>CH<sub>2</sub>OH), 39.78 (NH<sub>2</sub>CH<sub>2</sub>CH<sub>2</sub>triazole) 28.43 (triazoleCH<sub>2</sub>CH). HRMS (ESI) calcd. for **2**  
 374 [C<sub>31</sub>H<sub>40</sub>N<sub>6</sub>O<sub>10</sub>S + H]<sup>+</sup> 689.2599; found, 689.2592.

375

### 376 Phenylethoxy-modified galactoside **3**

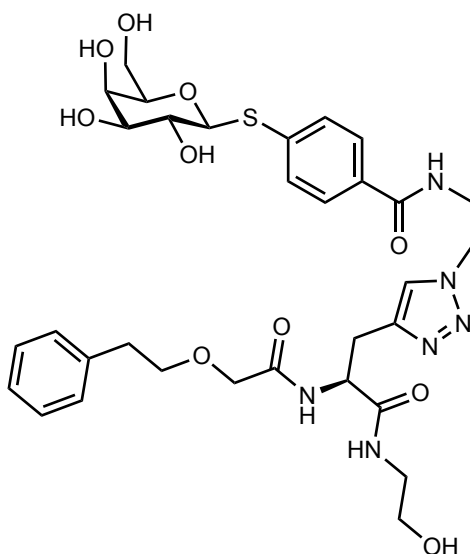

377

378 The product was obtained as a white powder (24.5 mg, 0.035 mmol, 90%, *R<sub>f</sub>* = 0.33;  
 379 CH<sub>2</sub>Cl<sub>2</sub>/MeOH 19:1). <sup>1</sup>H NMR (500 MHz, DMSO-*d*<sub>6</sub>) δ 8.55 (t, *J* = 5.6 Hz, 1H,  
 380 NHCH<sub>2</sub>CH<sub>2</sub>triazole), 8.00 (t, *J* = 5.7 Hz, 1H, NHCH<sub>2</sub>CH<sub>2</sub>OH), 7.77 (s, 1H, triazole-H), 7.75 –  
 381 7.69 (m, 2H, 2x SArCH), 7.68 (d, *J* = 8.3 Hz, 1H, CONHCH), 7.51 – 7.46 (m, 2H, 2x SArCH),  
 382 7.30 – 7.21 (m, 4H, 4x ArCH), 7.21 – 7.16 (m, 1H, ArCH), 4.70 (d, *J* = 9.6 Hz, 1H, H-1), 4.51 (td,  
 383 *J* = 7.9, 5.4 Hz, 1H, NHCHCH<sub>2</sub>CO), 4.45 (t, *J* = 6.4 Hz, 2H, NHCH<sub>2</sub>CH<sub>2</sub>triazole), 3.90 – 3.79 (m,  
 384 2H, COCH<sub>2</sub>O), 3.72 (d, *J* = 3.2 Hz, 1H, H-4), 3.69 – 3.55 (m, 2H, NHCH<sub>2</sub>CH<sub>2</sub>triazole), 3.60 (t, *J*  
 385 = 7.0 Hz, 2H, PhCH<sub>2</sub>CH<sub>2</sub>O), 3.56 – 3.44 (m, 4H, H-2, H-5, H-6), 3.44 – 3.33 (m, 4H,  
 386 NHCH<sub>2</sub>CH<sub>2</sub>OH, H-3), 3.18 – 2.91 (m, 4H, NHCH<sub>2</sub>CH<sub>2</sub>OH, CHCH<sub>2</sub>triazole), 2.83 (t, *J* = 7.0 Hz,  
 387 2H, PhCH<sub>2</sub>CH<sub>2</sub>O). <sup>13</sup>C NMR (126 MHz, DMSO-*d*<sub>6</sub>) δ 170.20 (C=O), 168.94 (C=O), 166.08  
 388 (C=O), 142.56 (ArC), 140.17 (SArC), 138.66 (triazole-C), 131.13 (SArC), 128.89 (2x ArCH),



389 128.26 (2x ArCH), 127.73 (2x SArCH), 127.58 (2x SArCH), 126.10 (ArCH), 123.17 (triazole-  
390 CH), 86.67 (C-1), 79.28 (C-5), 74.66 (C-3), 71.66 (PhCH<sub>2</sub>CH<sub>2</sub>O), 69.51 (COCH<sub>2</sub>O), 69.12 (C-2),  
391 68.38 (C-4), 60.60 (C-6), 59.61 (NHCH<sub>2</sub>CH<sub>2</sub>OH), 51.81 (NHCHCH<sub>2</sub>CO), 48.47  
392 (NHCH<sub>2</sub>CH<sub>2</sub>triazole), 41.54 (NHCH<sub>2</sub>CH<sub>2</sub>OH), 39.61 (NH<sub>2</sub>CH<sub>2</sub>CH<sub>2</sub>triazole), 35.32  
393 (PhCH<sub>2</sub>CH<sub>2</sub>OH), 28.42 (CHCH<sub>2</sub>triazole). HR-MS (ESI): calcd. for **3** [C<sub>32</sub>H<sub>42</sub>N<sub>6</sub>O<sub>10</sub>S + H]<sup>+</sup>  
394 703.2756; found 703.2751.

395

#### 396 Phenylpropoxy-modified galactoside **4**

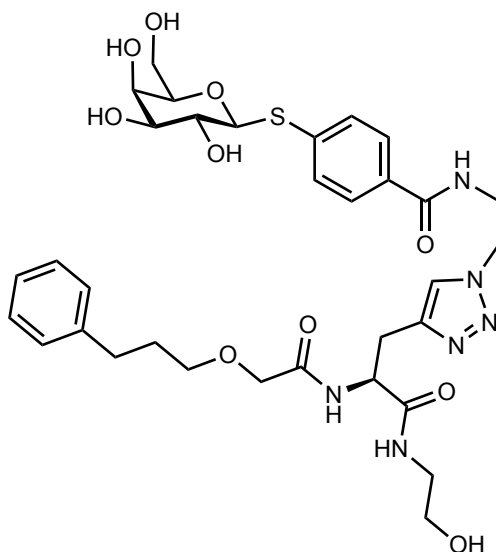

397  
398 The product was obtained as a white powder (25.6 mg, 0.036 mmol, 92%, *R<sub>f</sub>* = 0.41;  
399 CH<sub>2</sub>Cl<sub>2</sub>/MeOH 19:1). <sup>1</sup>H NMR (500 MHz, DMSO-*d*<sub>6</sub>) δ 8.55 (t, *J* = 5.7 Hz, 1H,  
400 NHCH<sub>2</sub>CHtriazole), 8.00 (t, *J* = 5.7 Hz, 1H, NHCH<sub>2</sub>CH<sub>2</sub>OH), 7.80 (s, 1H, triazole-H), 7.73 (d, *J*  
401 = 10.7 Hz, 1H, NHCHCH<sub>2</sub>CO), 7.71 (m, 2H, 2x SArCH), 7.51 – 7.46 (m, 2H, 2x SArCH), 7.27  
402 (t, *J* = 7.5 Hz, 2H, 2x ArCH), 7.23 – 7.13 (m, 3H, 3x ArCH), 4.70 (d, *J* = 9.6 Hz, 1H, H-1), 4.52  
403 (td, *J* = 7.8, 5.4 Hz, 1H, NHCHCH<sub>2</sub>CO), 4.46 (t, *J* = 6.4 Hz, 2H, NHCH<sub>2</sub>CH<sub>2</sub>triazole), 3.83 (q, *J*  
404 = 15.1 Hz, 2H, COCH<sub>2</sub>O), 3.72 (d, *J* = 3.2 Hz, 1H, H-4), 3.63 (tdd, *J* = 13.7, 7.6, 5.9 Hz, 2H,  
405 NHCH<sub>2</sub>CH<sub>2</sub>triazole), 3.55 – 3.44 (m, 5H, H-2, H-5, H-6), 3.43 – 3.32 (m, 5H, H-3,  
406 NHCH<sub>2</sub>CH<sub>2</sub>OH, PhCH<sub>2</sub>CH<sub>2</sub>CH<sub>2</sub>O), 3.18 – 2.95 (m, 4H, CHCH<sub>2</sub>triazole, NHCH<sub>2</sub>CH<sub>2</sub>OH), 2.64 –  
407 2.58 (m, 2H, PhCH<sub>2</sub>CH<sub>2</sub>CH<sub>2</sub>O), 1.84 – 1.77 (m, 2H, PhCH<sub>2</sub>CH<sub>2</sub>CH<sub>2</sub>O). <sup>13</sup>C NMR (126 MHz,  
408 DMSO-*d*<sub>6</sub>) δ 170.20 (C=O), 169.00 (C=O), 166.07 (C=O), 142.54 (ArC), 141.69 (SArC), 140.16  
409 (triazole-C), 131.12 (SArC), 128.31 (2x ArCH), 128.29 (2x ArCH), 127.72 (2x SArCH), 127.57  
410 (2x SArCH), 125.72 (ArCH), 123.19 (triazole-CH), 86.67 (C-1), 79.27 (C-5), 74.66 (C-3), 70.13

411 (PhCH<sub>2</sub>CH<sub>2</sub>CH<sub>2</sub>O), 69.57 (COCH<sub>2</sub>O), 69.12 (C-2), 68.38 (C-4), 60.59 (C-6), 59.61  
 412 (NHCH<sub>2</sub>CH<sub>2</sub>OH), 51.81 (NHCH<sub>2</sub>CH<sub>2</sub>CO), 48.48 (NHCH<sub>2</sub>CH<sub>2</sub>triazole), 41.54 (NHCH<sub>2</sub>CH<sub>2</sub>OH),  
 413 39.78 (NHCH<sub>2</sub>CH<sub>2</sub>triazole), 31.54 (PhCH<sub>2</sub>CH<sub>2</sub>CH<sub>2</sub>O), 30.80 (PhCH<sub>2</sub>CH<sub>2</sub>CH<sub>2</sub>O), 28.41  
 414 (CHCH<sub>2</sub>triazole). HR-MS (ESI): calcd. for 4 [C<sub>33</sub>H<sub>44</sub>N<sub>6</sub>O<sub>10</sub>S + H]<sup>+</sup> 717.2912; found 717.2902.

415

#### 416 Phenylbutoxy-modified galactoside 5

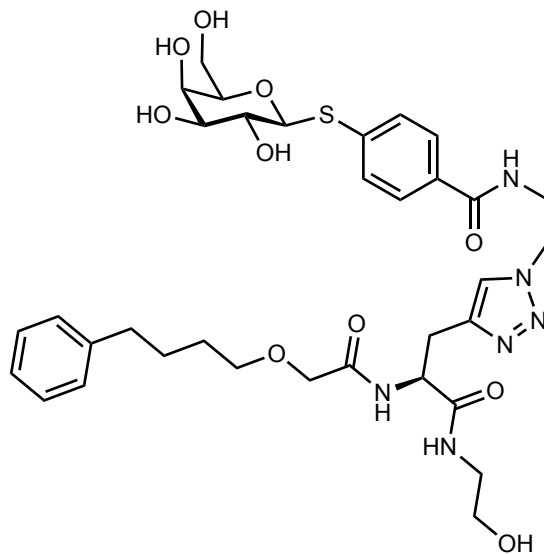

417  
 418 The product was obtained as a white powder (24.2 mg, 0.033, 85%,  $R_f = 0.44$ ; CH<sub>2</sub>Cl<sub>2</sub>/MeOH  
 419 19:1). <sup>1</sup>H NMR (500 MHz, DMSO-*d*<sub>6</sub>) δ 8.55 (t,  $J = 5.6$  Hz, 1H, NHCH<sub>2</sub>CH<sub>2</sub>triazole), 8.01 (t,  $J =$   
 420 5.7 Hz, 1H, NHCH<sub>2</sub>CH<sub>2</sub>OH), 7.79 (s, 1H, triazole-H), 7.71 (d,  $J = 8.5$  Hz, 2H, 2x SArCH), 7.68  
 421 (d,  $J = 8.2$  Hz, 1H, CONHCH), 7.48 (d,  $J = 8.6$  Hz, 2H, 2x SArCH), 7.26 (t,  $J = 7.5$  Hz, 2H, 2x  
 422 ArCH), 7.23 – 7.12 (m, 3H, 3x ArCH), 5.20 (s, 1H, OH-2), 4.90 (s, 1H, OH-3), 4.70 (d,  $J = 9.6$  Hz,  
 423 1H, H-1), 4.66 (s, 1H, OH-4), 4.51 (td,  $J = 7.8, 5.4$  Hz, 1H, NHCH<sub>2</sub>CH<sub>2</sub>OH), 4.45 (t,  $J = 6.3$  Hz,  
 424 2H, NHCH<sub>2</sub>CH<sub>2</sub>triazole), 3.88 – 3.75 (m, 2H, COCH<sub>2</sub>O), 3.72 (d,  $J = 3.2$  Hz, 1H, H-4), 3.69 –  
 425 3.56 (m, 2H, NHCH<sub>2</sub>CH<sub>2</sub>triazole), 3.55 – 3.44 (m, 5H, H-2, H-5, H-6), 3.42 – 3.27 (m, 6H,  
 426 NHCH<sub>2</sub>CH<sub>2</sub>OH, PhCH<sub>2</sub>CH<sub>2</sub>CH<sub>2</sub>CH<sub>2</sub>O, H-3), 3.18 – 2.94 (m, 4H, NHCH<sub>2</sub>CH<sub>2</sub>OH,  
 427 CHCH<sub>2</sub>triazole), 2.57 (t,  $J = 7.5$  Hz, 2H, PhCH<sub>2</sub>CH<sub>2</sub>CH<sub>2</sub>CH<sub>2</sub>O), 1.65 – 1.56 (m, 2H,  
 428 PhCH<sub>2</sub>CH<sub>2</sub>CH<sub>2</sub>CH<sub>2</sub>O), 1.56 – 1.47 (m, 2H, PhCH<sub>2</sub>CH<sub>2</sub>CH<sub>2</sub>CH<sub>2</sub>O). <sup>13</sup>C NMR (126 MHz,  
 429 DMSO-*d*<sub>6</sub>) δ 170.19 (C=O), 169.02 (C=O), 166.07 (C=O), 142.52 (ArC), 142.09 (SArC), 140.17  
 430 (triazole-C), 131.13 (SArC), 128.30 (2x ArCH), 128.23 (2x ArCH), 127.73 (2x SArCH), 127.58  
 431 (2x SArCH), 125.64 (ArCH), 123.16 (triazole-CH), 86.68 (C-1), 79.28 (C-5), 74.66 (C-3), 70.62  
 432 (PhCH<sub>2</sub>CH<sub>2</sub>CH<sub>2</sub>CH<sub>2</sub>O), 69.58 (COCH<sub>2</sub>O), 69.12 (C-2), 68.38 (C-4), 60.60 (C-6), 59.60

433 (NHCH<sub>2</sub>CH<sub>2</sub>OH), 51.79 (NHCHCH<sub>2</sub>CO), 48.47 (NHCH<sub>2</sub>CH<sub>2</sub>triazole), 41.55 (NHCH<sub>2</sub>CH<sub>2</sub>OH),  
 434 39.78 (NHCH<sub>2</sub>CH<sub>2</sub>triazole), 34.84 (PhCH<sub>2</sub>CH<sub>2</sub>CH<sub>2</sub>CH<sub>2</sub>O), 28.59 (PHCH<sub>2</sub>CH<sub>2</sub>CH<sub>2</sub>CH<sub>2</sub>O), 28.45  
 435 (CHCH<sub>2</sub>triazole), 27.36 (PhCH<sub>2</sub>CH<sub>2</sub>CH<sub>2</sub>CH<sub>2</sub>O). HR-MS (ESI): calcd. for **5** [C<sub>34</sub>H<sub>46</sub>N<sub>6</sub>O<sub>10</sub>S + H]<sup>+</sup>  
 436 731.3069; found 731.3061.

437

438 ***p*-Tolyloxy-modified galactoside **6****

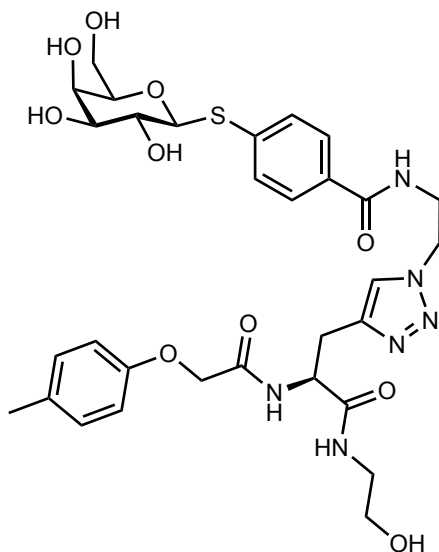

439  
 440 The product was obtained as a white powder (22.9 mg, 0.033 mmol, 85%,  $R_f = 0.28$ ;  
 441 CH<sub>2</sub>Cl<sub>2</sub>/MeOH 19:1). <sup>1</sup>H NMR (500 MHz, DMSO-*d*<sub>6</sub>) δ 8.56 (t,  $J = 5.7$  Hz, 1H,  
 442 NHCH<sub>2</sub>CH<sub>2</sub>triazole), 8.13 (d,  $J = 8.2$  Hz, 1H, CHNHCO), 8.00 (t,  $J = 5.7$  Hz, 1H, NHCH<sub>2</sub>CH<sub>2</sub>OH),  
 443 7.74 (s, 1H, triazole-H), 7.71 (d,  $J = 8.6$  Hz, 2H, 2x SArCH), 7.48 (d,  $J = 8.6$  Hz, 2H, 2x SArCH),  
 444 7.10 – 7.05 (m, 2H, 2x OArCH), 6.79 (d,  $J = 8.6$  Hz, 2H, 2x OArCH), 5.22 (d,  $J = 6.0$  Hz, 1H,  
 445 OH-2), 4.92 (d,  $J = 5.6$  Hz, 1H, OH-3), 4.70 (d,  $J = 9.2$  Hz, 1H, H-1), 4.66 (t,  $J = 5.8$  Hz, 1H,  
 446 OH-6), 4.55 – 4.49 (m, 2H, CH<sub>2</sub>CHNH, OH-4), 4.48 – 4.39 (m, 4H, COCH<sub>2</sub>O,  
 447 NHCH<sub>2</sub>CH<sub>2</sub>triazole), 3.72 (t,  $J = 4.0$  Hz, 1H, H-4), 3.69 – 3.55 (m, 2H, NHCH<sub>2</sub>CH<sub>2</sub>triazole), 3.56  
 448 – 3.44 (m, 4H, H-2, H-3, NHCH<sub>2</sub>CH<sub>2</sub>OH), 3.40 – 3.36 (m, 1H, H-5?), 3.32 (s, 2H, H-6), 3.17 –  
 449 3.09 (m, 1H, 1x triazoleCH<sub>2</sub>CH), 3.09 – 3.03 (m, 2H, NHCH<sub>2</sub>CH<sub>2</sub>OH), 2.97 (dd,  $J = 14.7, 8.1$  Hz,  
 450 1H, 1x triazoleCH<sub>2</sub>CH), 2.22 (s, 3H, CH<sub>3</sub>). <sup>13</sup>C NMR (126 MHz, DMSO-*d*<sub>6</sub>) δ 170.21 (C=O),  
 451 167.67 (C=O), 166.08 (C=O), 155.56 (OArC), 142.64 (SArC), 140.15 (SArC), 131.13 (triazole-C),  
 452 129.90 (OArCCH<sub>3</sub>), 129.82 (2x OArCH), 127.73 (2x SArCH), 127.57 (2x SArCH), 123.16  
 453 (triazole-CH), 114.50 (2x OArCH), 86.67 (C-1), 79.28 (C-5), 74.66 (C-3), 69.12 (C-2), 68.39



476 (NHCH<sub>2</sub>CH<sub>2</sub>OH), 39.77 (NHCH<sub>2</sub>CH<sub>2</sub>triazole), 28.31 (triazoleCH<sub>2</sub>CH). HRMS (ESI) calcd. for 7  
477 [C<sub>30</sub>H<sub>37</sub>FN<sub>6</sub>O<sub>10</sub>S + H]<sup>+</sup> 693.2349; found, 693.2339.

478

479 **Naphthyloxy-modified galactoside 8**

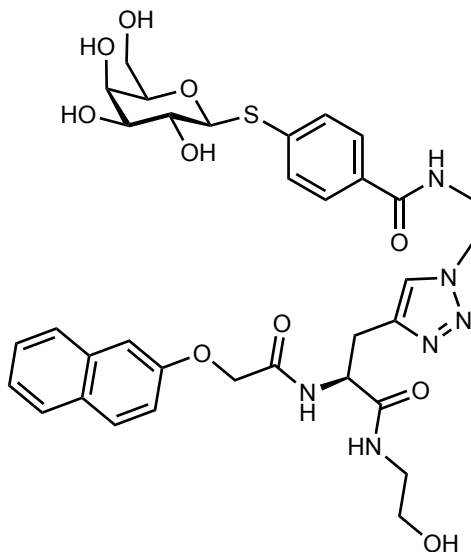

480  
481 The product was obtained as a white powder (25.0 mg, 0.034 mmol, 88%, *R<sub>f</sub>* = 0.31;  
482 CH<sub>2</sub>Cl<sub>2</sub>/MeOH 19:1). <sup>1</sup>H NMR (500 MHz, DMSO-*d*<sub>6</sub>) δ 8.55 (t, *J* = 5.7 Hz, 1H,  
483 NHCH<sub>2</sub>CH<sub>2</sub>triazole), 8.28 (d, *J* = 8.1 Hz, 1H, CHNHCO), 8.04 (t, *J* = 5.7 Hz, 1H, NHCH<sub>2</sub>CH<sub>2</sub>OH),  
484 7.84 (dd, *J* = 8.5, 5.1 Hz, 2H, 2x naphthyl-H), 7.78 (d, *J* = 8.2 Hz, 1H, naphthyl-H), 7.76 (s, 1H,  
485 triazole-H), 7.71 (d, *J* = 8.3 Hz, 2H, 2x SArCH), 7.49 – 7.44 (m, 3H, 2x SArCH, naphthyl-H), 7.36  
486 (ddd, *J* = 8.1, 6.7, 1.2 Hz, 1H, naphthyl-H), 7.26 (d, *J* = 2.6 Hz, 1H, naphthyl-H), 7.22 (dd, *J* = 8.9,  
487 2.5 Hz, 1H, naphthyl-H), 4.70 (d, *J* = 9.6 Hz, 1H, H-1), 4.67 – 4.59 (m, 2H, COCH<sub>2</sub>O), 4.59 – 4.53  
488 (m, 1H, CH<sub>2</sub>CHNHCO), 4.39 (td, *J* = 6.3, 2.4 Hz, 2H, NHCH<sub>2</sub>CH<sub>2</sub>triazole), 3.72 (d, *J* = 3.2 Hz,  
489 1H, H-4), 3.59 (td, *J* = 13.8, 7.1 Hz, 2H, NHCH<sub>2</sub>CH<sub>2</sub>triazole), 3.55 – 3.43 (m, 4H, H-2, H-3,  
490 NHCH<sub>2</sub>CH<sub>2</sub>OH), 3.40 – 3.34 (m, 3H, H-5, H-6), 3.19 – 3.10 (m, 1H, 1x triazolCH<sub>2</sub>CH), 3.10 –  
491 3.05 (m, 2H, NHCH<sub>2</sub>CH<sub>2</sub>OH), 3.05 – 2.97 (m, 1H, 1x triazolCH<sub>2</sub>CH). <sup>13</sup>C NMR (126 MHz,  
492 DMSO-*d*<sub>6</sub>) δ 170.29 (C=O), 167.48 (C=O), 166.10 (C=O), 155.53 (naphthyl-C), 142.72 (ArC),  
493 140.18 (ArC), 134.07 (naphthyl-C), 131.15 (naphthyl-C), 129.41 (naphthyl-CH), 128.74  
494 (triazole-C), 127.73 (2x SArCH), 127.60 (2x SArCH), 127.56 (naphthyl-CH), 126.80 (naphthyl-  
495 CH) 126.53 (naphthyl-CH), 123.91 (naphthyl-CH), 123.18 (triazole-CH), 118.56 (naphthyl-CH),  
496 107.31 (naphthyl-CH), 86.68 (C-1), 79.30 (H-5), 74.67 (C-3), 69.13 (C-2), 68.41 (C-4), 66.76  
497 (COCH<sub>2</sub>OAr), 60.63 (NHCH<sub>2</sub>CH<sub>2</sub>OH), 59.63 (C-6), 52.24 (CH<sub>2</sub>CHNHCO), 48.48

498 (NHCH<sub>2</sub>CH<sub>2</sub>triazole), 41.59 (NHCH<sub>2</sub>CH<sub>2</sub>OH), 39.78 (NHCH<sub>2</sub>CH<sub>2</sub>triazole) 28.32  
499 (triazoleCH<sub>2</sub>CH). HRMS (ESI) calcd. for **8** [C<sub>34</sub>H<sub>40</sub>N<sub>6</sub>O<sub>10</sub>S +H]<sup>+</sup> 725.2599; found, 725.2591.

500

501 ***o*-Hydroxyphenyl-modified galactoside **9****

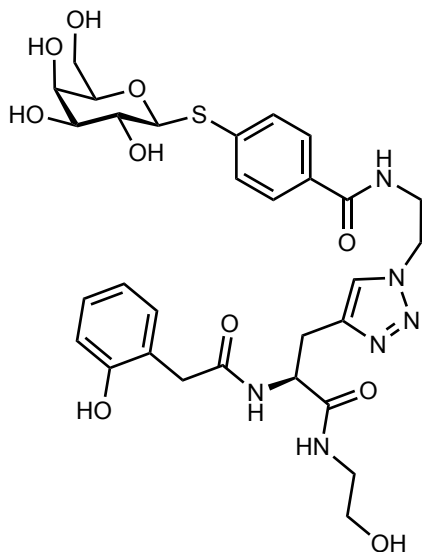

502  
503 The product was obtained as a white powder (19.1 mg, 0.028 mmol, 73%, *R<sub>f</sub>* = 0.21;  
504 CH<sub>2</sub>Cl<sub>2</sub>/MeOH 19:1). <sup>1</sup>H NMR (500 MHz, DMSO-*d*<sub>6</sub>) δ 9.63 (s, 1H, ArOH), 8.58 (t, *J* = 5.7 Hz,  
505 1H, NHCH<sub>2</sub>CH<sub>2</sub>triazole), 8.11 (d, *J* = 8.2 Hz, 1H, CHNHCO), 7.94 (t, *J* = 5.7 Hz, 1H,  
506 NHCH<sub>2</sub>CH<sub>2</sub>OH), 7.72 (d, *J* = 8.5 Hz, 1H, SArCH), 7.65 (s, 1H, triazole-H), 7.48 (d, *J* = 8.5 Hz,  
507 1H, SArCH), 7.04 (td, *J* = 7.7, 1.7 Hz, 1H, ArCH), 6.99 (dd, *J* = 7.6, 1.7 Hz, 1H, ArCH), 6.78 (dd,  
508 *J* = 8.1, 1.3 Hz, 1H, ArCH), 6.71 (td, *J* = 7.4, 1.3 Hz, 1H, ArCH), 5.22 (d, *J* = 6.1 Hz, 1H, OH-2),  
509 4.93 (d, *J* = 5.7 Hz, 1H, OH-3), 4.70 (d, *J* = 9.7 Hz, 1H, H-1), 4.68 (s, 1H, OH-6), 4.54 (d, *J* =  
510 4.4 Hz, 1H, OH-4), 4.49 – 4.41 (m, 3H, NHCH<sub>2</sub>CH<sub>2</sub>triazole, CH<sub>2</sub>CHNHCO), 3.72 (t, *J* = 3.8 Hz,  
511 1H, H-4), 3.70 – 3.55 (m, 1H, NHCH<sub>2</sub>CH<sub>2</sub>triazole), 3.55 – 3.44 (m, 4H, H-2, H-3?,  
512 NHCH<sub>2</sub>CH<sub>2</sub>OH), 3.41 (s, 2H, COCH<sub>2</sub>Ar), 3.39 – 3.37 (m, 3H, H-5, H-6), 3.19 – 3.10 (m, 1H, 1x  
513 triazoleCH<sub>2</sub>CH), 3.10 – 2.98 (m, 2H, NHCH<sub>2</sub>CH<sub>2</sub>OH), 2.93 – 2.84 (m, 1H, 1x triazoleCH<sub>2</sub>CH).  
514 <sup>13</sup>C NMR (126 MHz, DMSO-*d*<sub>6</sub>) δ 170.74 (C=O), 170.52 (C=O), 166.15 (C=O), 155.27 (ArCOH),  
515 142.73 (SArC), 140.22 (SArC), 131.14 (triazole-C), 130.70 (ArCH), 127.78 (ArCH), 127.76 (2x  
516 SArCH), 127.63 (2x SArCH), 123.11 (ArC), 122.56 (triazole-CH), 118.99 (ArCH), 115.16  
517 (ArCH), 86.68 (C-1), 79.31 (C-5), 74.68 (C-3), 69.15 (C-2), 68.43 (C-4), 60.65 (NHCH<sub>2</sub>CH<sub>2</sub>OH),  
518 59.63 (C-6), 52.51 (CH<sub>2</sub>CHNHCO), 48.52 (NHCH<sub>2</sub>CH<sub>2</sub>triazole), 41.52 (NHCH<sub>2</sub>CH<sub>2</sub>OH), 39.78

519 (NHCH<sub>2</sub>CH<sub>2</sub>triazole), 37.17 (COCH<sub>2</sub>Ar), 28.55 (triazoleCH<sub>2</sub>CH). HRMS (ESI) calcd. for **9**  
520 [C<sub>30</sub>H<sub>38</sub>N<sub>6</sub>O<sub>10</sub>S +H]<sup>+</sup> 675.2443; found, 675.2433.  
521

522 **Molecular Dynamics**523 **Table S1:** Analyzed LecA PDB structures and corresponding co-crystalized ligands, when present.

| Ligand                                                                                                                                                                            | PDB ID | Resolution (Å) |
|-----------------------------------------------------------------------------------------------------------------------------------------------------------------------------------|--------|----------------|
| Apo                                                                                                                                                                               | 117l   | 1.5            |
| Apo                                                                                                                                                                               | 1uoj   | 2.4            |
| $\beta$ -D-galactose / $\alpha$ -D-galactose                                                                                                                                      | 1oko   | 1.6            |
| Gal $\alpha$ (1 $\rightarrow$ 3) Gal $\beta$ (1 $\rightarrow$ 4) Glc                                                                                                              | 2vxj   | 1.9            |
| Gal- $\alpha$ (1 $\rightarrow$ 2) Gal $\beta$ -O-Me                                                                                                                               | 2wyf   | 2.4            |
| 4-Hydroxybenzoic acid 4-O-galactoside                                                                                                                                             | 3zyb   | 2.29           |
| 4-Nitrophenyl $\beta$ -D-galactopyranoside                                                                                                                                        | 3zyf   | 1.94           |
| 3-( $\beta$ -D-galactopyranosylthio)propanoic acid                                                                                                                                | 3zyh   | 1.5            |
| Naphthalen-2-YL-Thio- $\beta$ -D-galactopyranoside                                                                                                                                | 4a6s   | 2.15           |
| Melibiose (Gal $\alpha$ (1 $\rightarrow$ 6) Glc)                                                                                                                                  | 4al9   | 1.75           |
| (4S)-N-Ethyl-4- {[N-methyl-3-(1-{2-[(4-sulfanylbenzoyl)-aminoethyl]-1H-1,2,3-triazol-4-yl)-L-alanyl]amino}-L-prolinamide- $\beta$ -D-galactoside                                  | 4cp9   | 1.65           |
| (4S)-N-Ethyl-4- {[N-methyl-3-(1-{2-[(4-sulfanylbenzoyl)-aminoethyl]-1H-1,2,3-triazol-4-yl)-L-alanyl]amino}-L-prolinamide- $\beta$ -D-galactoside                                  | 4cpb   | 1.57           |
| N-Methyl-3-indolyl $\beta$ -D-galactopyranoside                                                                                                                                   | 4ljh   | 1.45           |
| Chlorophenol Red- $\beta$ -D-galactopyranoside                                                                                                                                    | 4lk6   | 2.86           |
| Resorufin- $\beta$ -D-galactopyranoside                                                                                                                                           | 4lk7   | 1.76           |
| 4-Hydroxybenzoic acid 4-O-galactoside                                                                                                                                             | 4lkd   | 2.31           |
| 4-Hydroxybenzoic acid 4-O-galactoside                                                                                                                                             | 4lke   | 1.65           |
| 4-Hydroxybenzoic acid 4-O-galactoside                                                                                                                                             | 4lkf   | 1.64           |
| N-[(2S)-6-amino-1-oxo-1-(pyrrolidin-1-yl)hexan-2-yl]-4-(beta-D- galactopyranosyloxy)benzamide                                                                                     | 4yw6   | 1.4            |
| (2R,3R,4S,5R,6R,2'R,3'R,4'S,5'R,6'R)-2,2'-([(2R,3R,4S,5S,6S)-3,4- dihydroxy-6-(hydroxymethyl)tetrahydro-2H-pyran-2,5- diyl]bis{1H- 1,2,3-triazole-1,4-diyl}[(2S,3R,4S,5S,6S)-3,4- | 4yw7   | 1.82           |



dihydroxy-6- (hydroxymethyl)tetrahydro-2H-pyran-2,5-diyl]-  
 1H-1,2,3-triazole-1,4- diylpropane-3,1-diyloxy})bis[6-  
 (hydroxymethyl)tetrahydro-2H-pyran- 3,4,5-triol]  
 Phenyl 6,7-dideoxy-6,7-epoxy-beta-D-galacto-  
 heptopyranoside(6D) 5mih 1.8

524

525 **Table S2:** Analyzed dimer LecA structures of different PDB files to determine the volume of the  
 526 cavity.

| PDB ID | Number of cavities | Nature            | Volume (Å <sup>3</sup> ) |
|--------|--------------------|-------------------|--------------------------|
| 117l   | 0                  |                   |                          |
| 1oko   | 1                  | Central pocket    | 236                      |
| 1uoj   | 0                  |                   |                          |
| 2vxj   | 1                  | Central pocket    | 297                      |
| 2wyf   | 1                  | Central pocket    | 307                      |
| 2wyf   | 2                  | Central pocket    | 297                      |
| 3zyf   | 0                  |                   |                          |
| 3zyh   | 1                  | Additional cavity | 263                      |
| 3zyh   | 2                  | Central pocket    | 243                      |
| 4a6s   | 0                  |                   |                          |
| 4al9   | 1                  | Central pocket    | 280                      |
| 4cp9   | 1                  | Central pocket    | 303                      |
| 4cp9   | 2                  | Central pocket    | 286                      |
| 4cpb   | 1                  | Central pocket    | 253                      |
| 4ljh   | 1                  | Central pocket    | 314                      |
| 4ljh   | 2                  | Central pocket    | 273                      |
| 4lk6   | 1                  | Central pocket    | 344                      |
| 4lk6   | 2                  | Central pocket    | 297                      |
| 4lk7   | 1                  | Central pocket    | 294                      |
| 4lk7   | 2                  | Central pocket    | 260                      |
| 4lkd   | 1                  | Central pocket    | 284                      |
| 4lke   | 1                  | Central pocket    | 341                      |

---

|      |   |                |     |
|------|---|----------------|-----|
| 4lke | 2 | Central pocket | 314 |
| 4lkf | 1 | Central pocket | 297 |
| 4lkf | 2 | Central pocket | 287 |
| 4yw6 | 0 |                |     |
| 4yw7 | 1 | Central pocket | 300 |
| 4ywa | 1 | Central pocket | 182 |
| 5d21 | 0 |                |     |
| 5mih | 1 | Central pocket | 277 |
| 5mih | 2 | Central pocket | 263 |

---

527

528 Isothermal Titration Calorimetry (ITC)

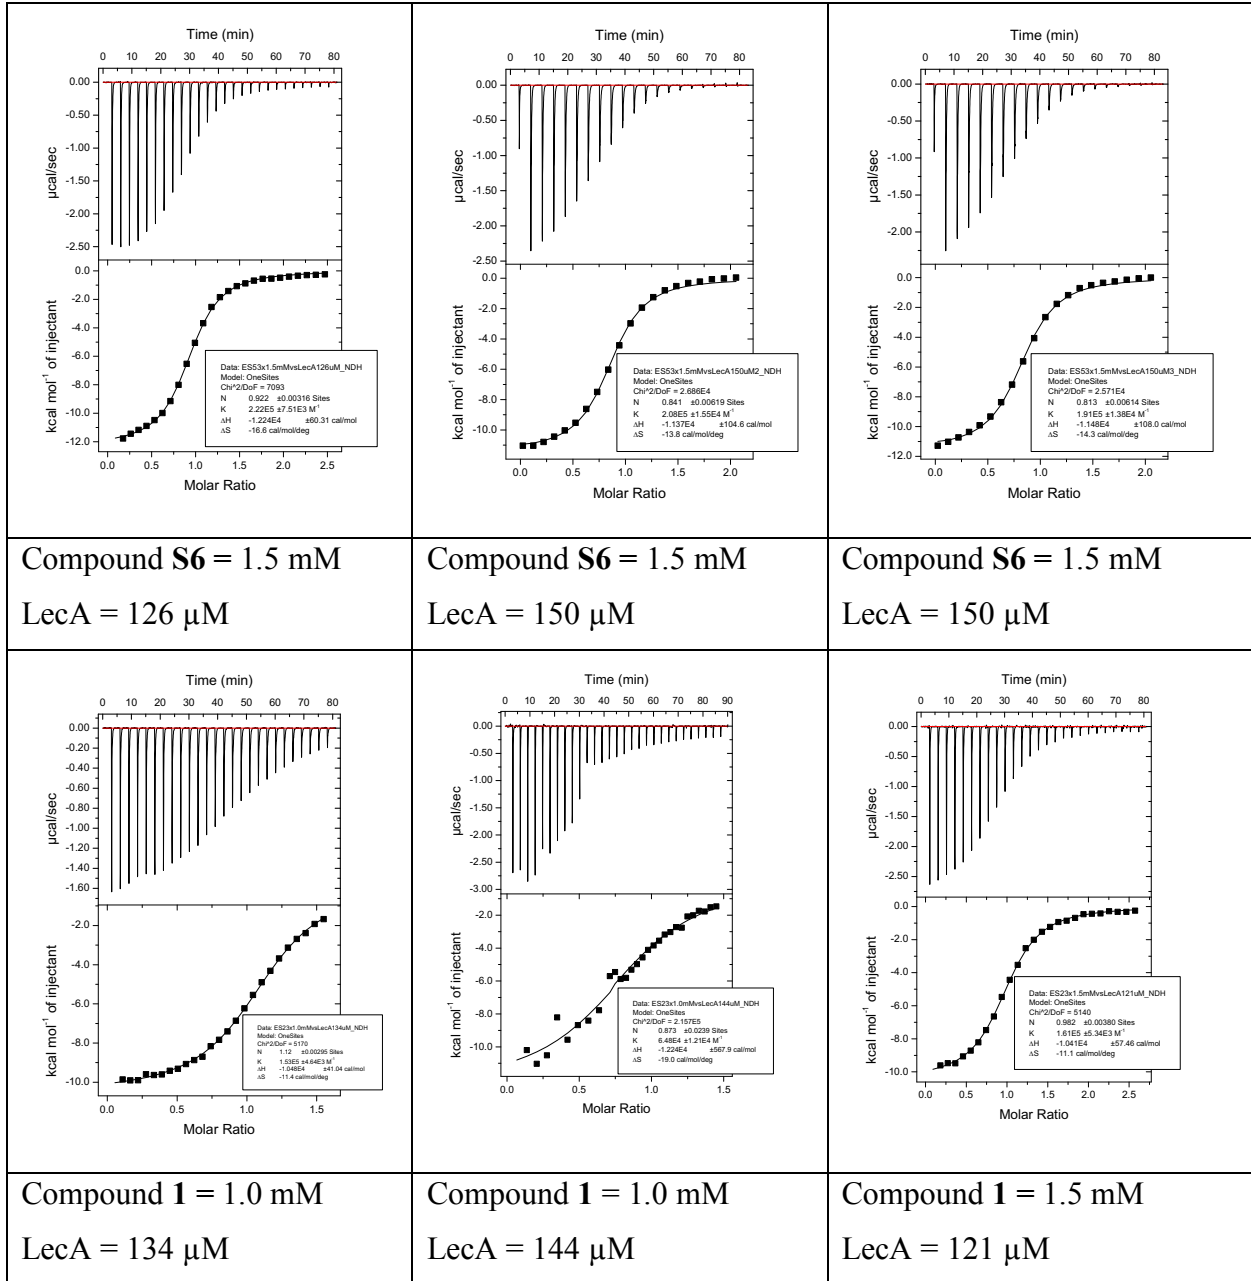

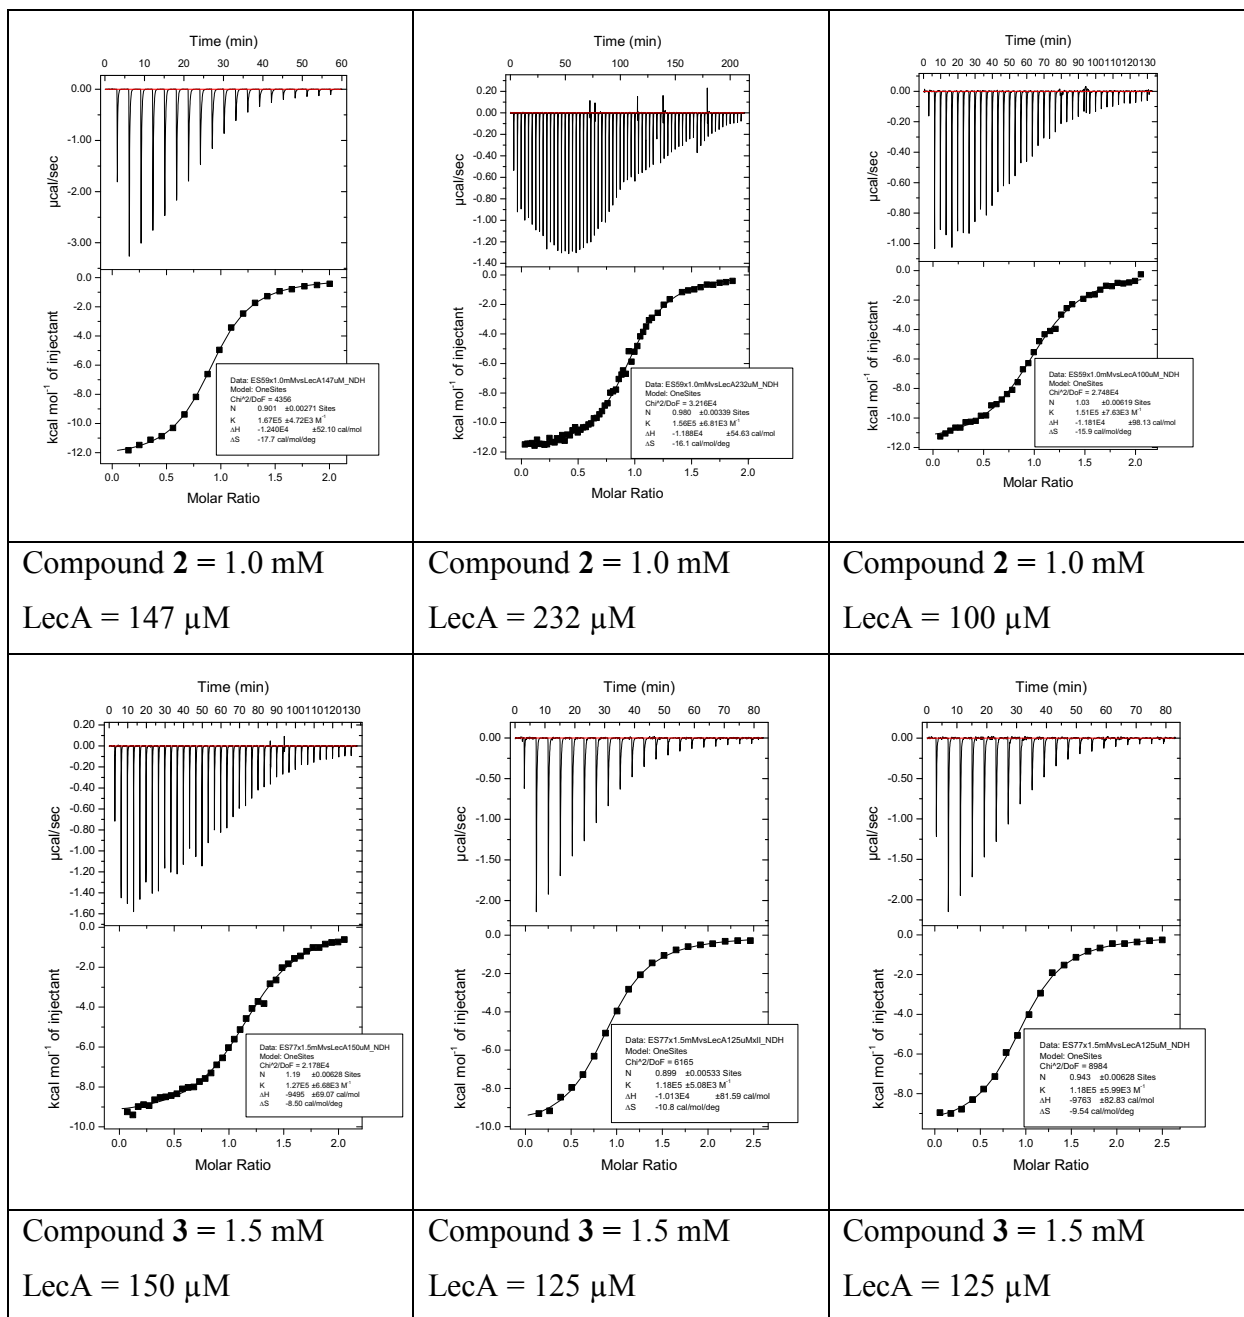

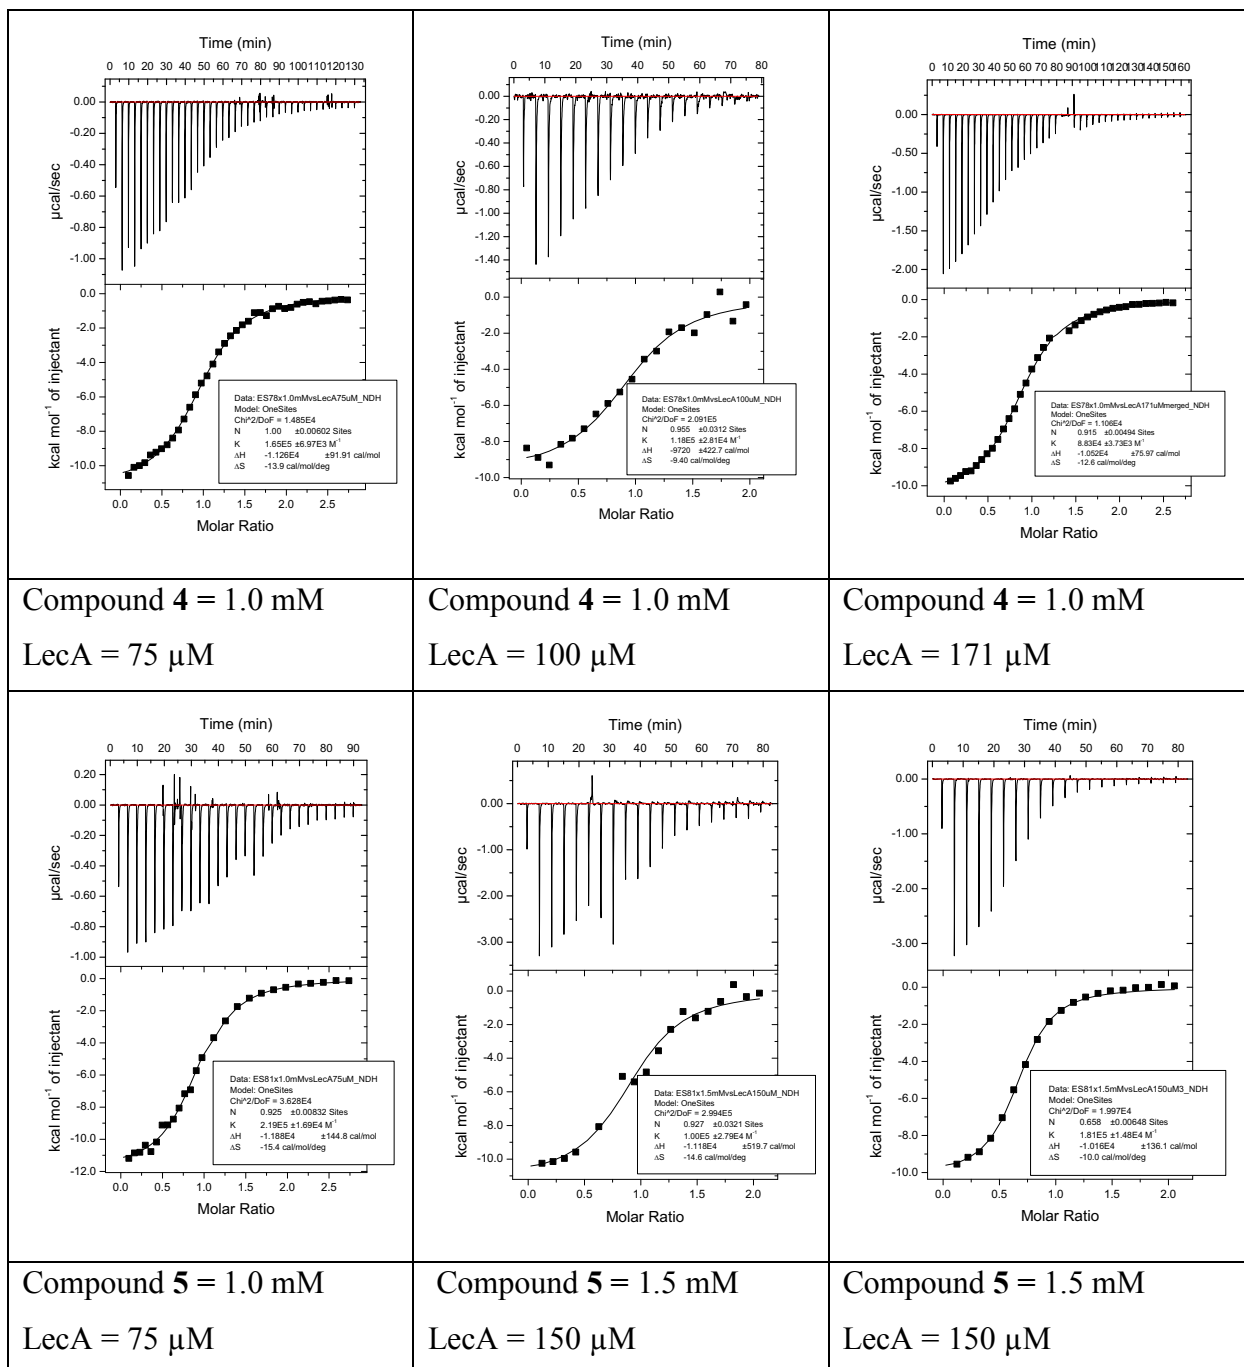

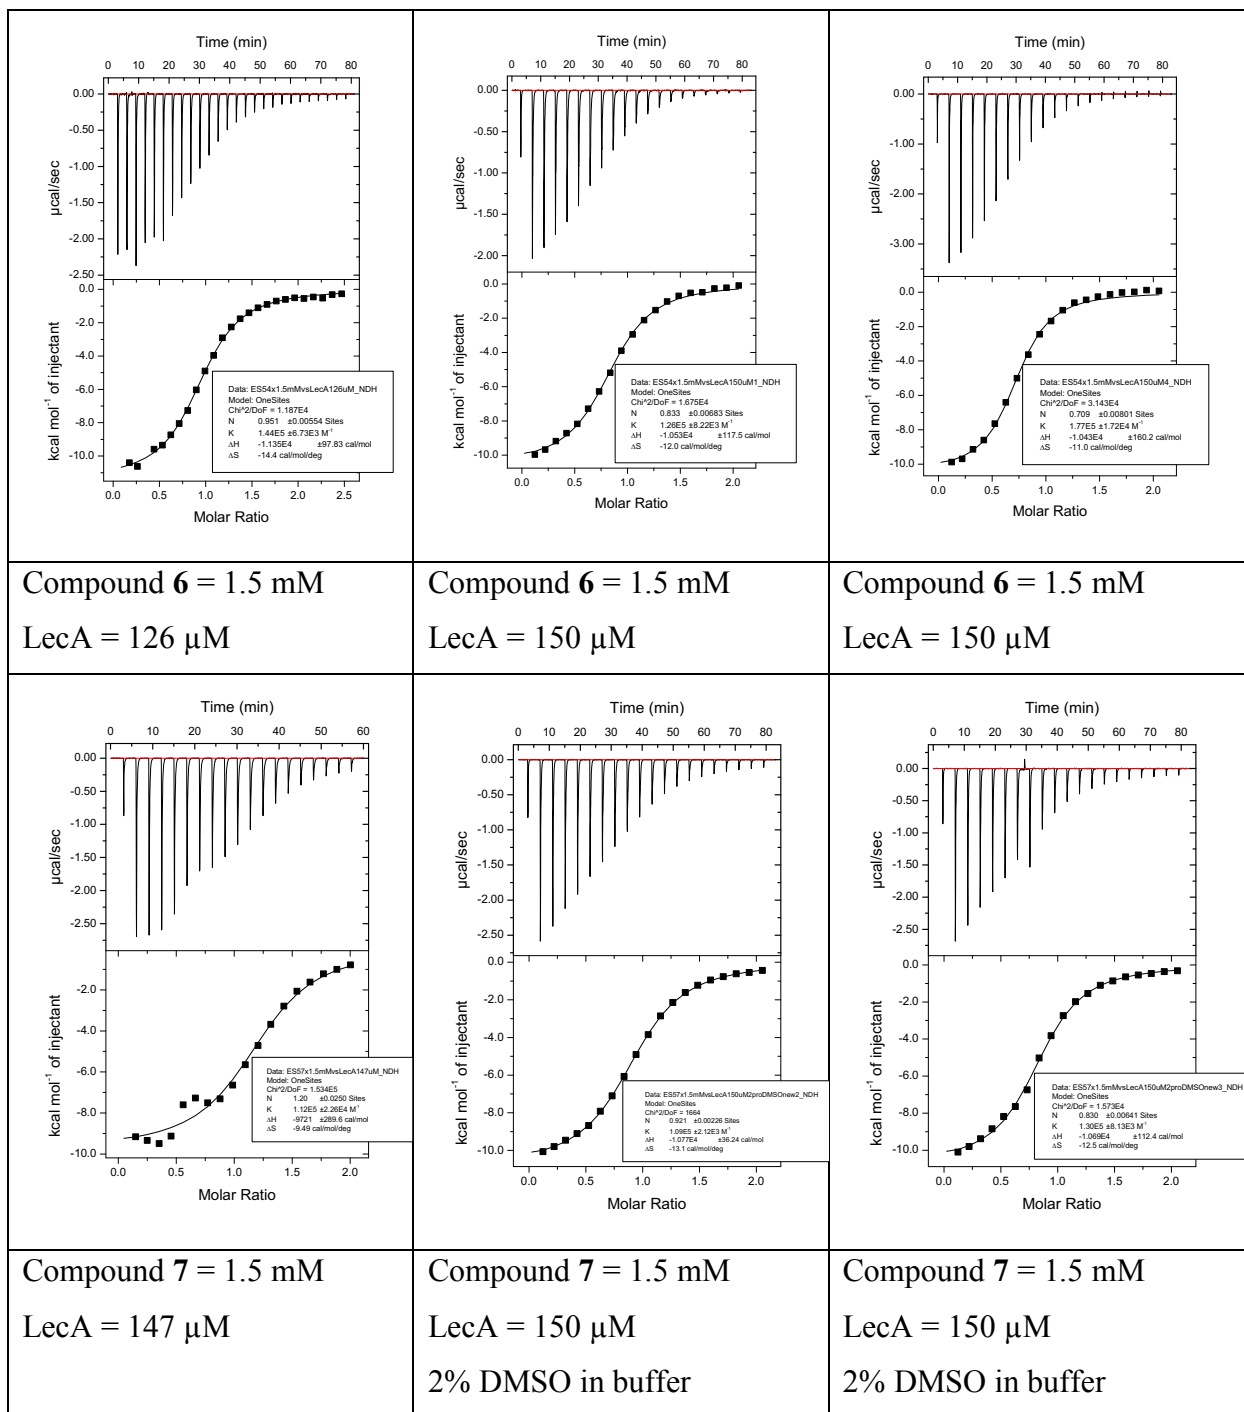

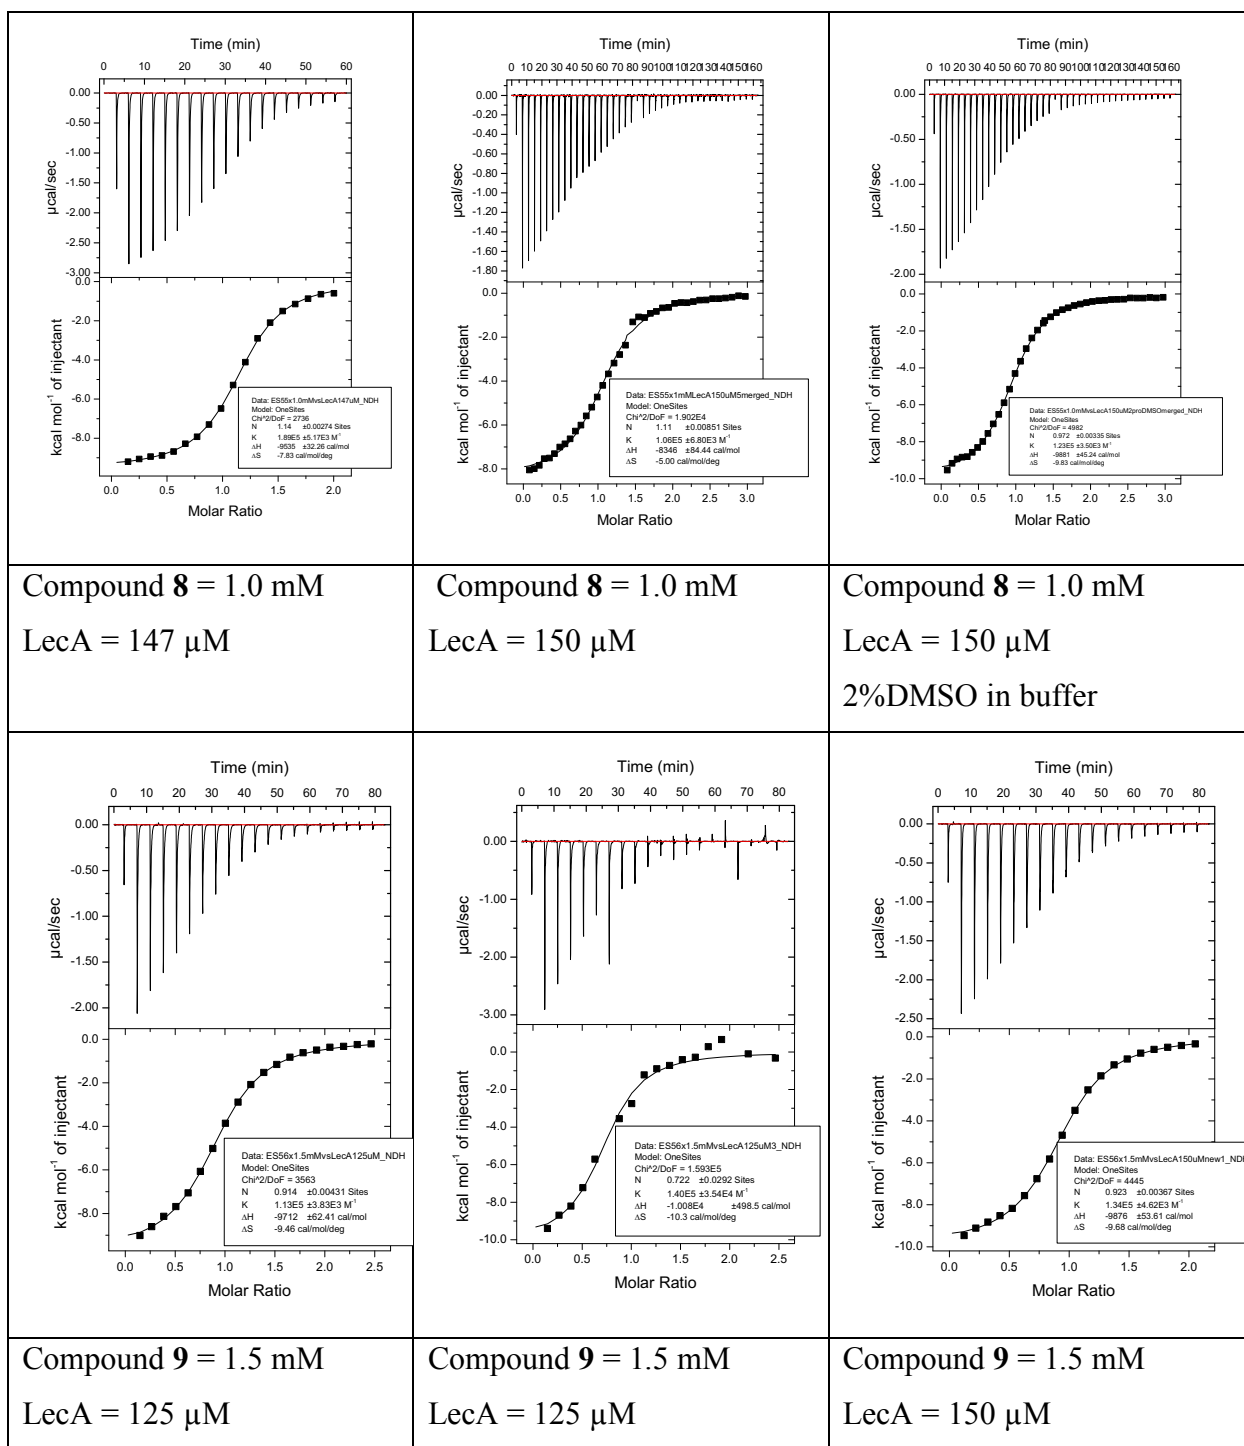

529 **Figure S1:** ITC titration experiments with LecA.

530

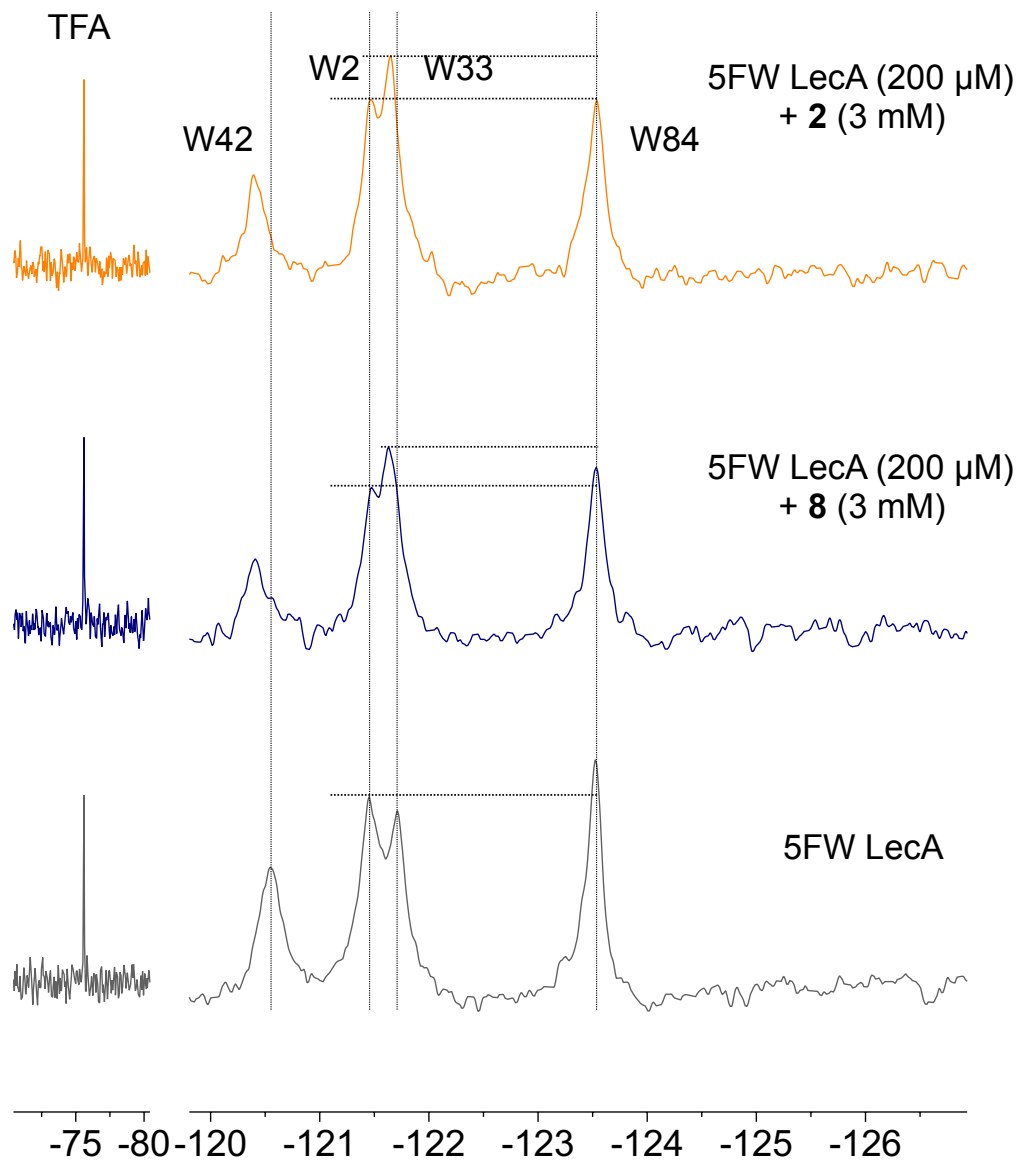

532  
533 **Figure S2:** <sup>19</sup>F PrOF NMR of 5FW LecA: without ligand (gray), with the benzyl ether **2** (orange)  
534 and the naphthyl compound **8** (blue). A chemical shift perturbation of Trp42 and Trp33 has been  
535 observed in presence of both ligands indicating that ligands target the carbohydrate and the central  
536 pockets, respectively.



537 **Surface Plasmon Resonance (SPR)**

538

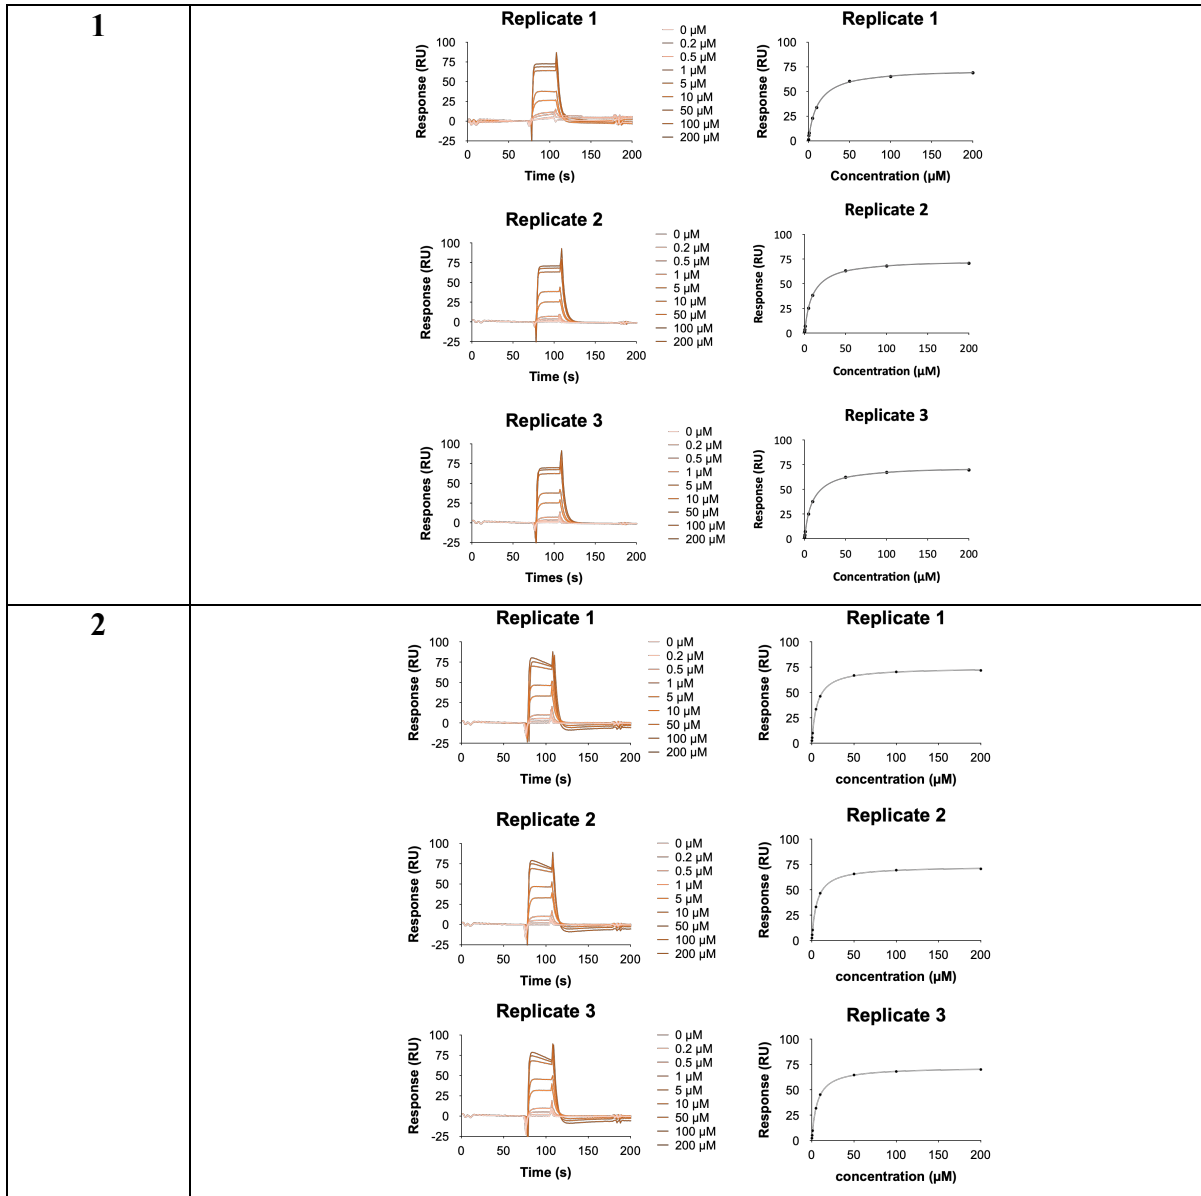

3

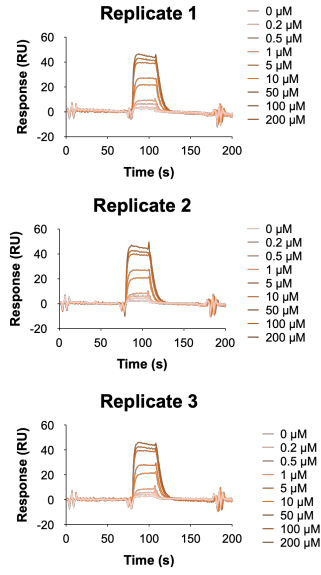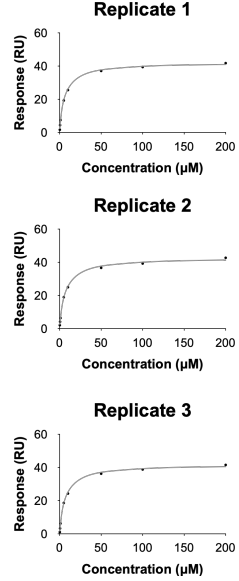

4

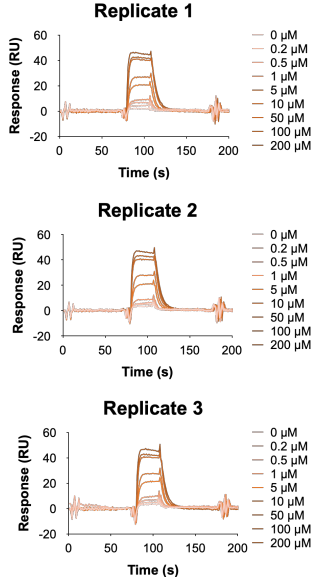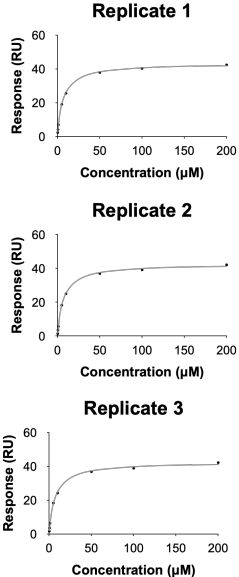

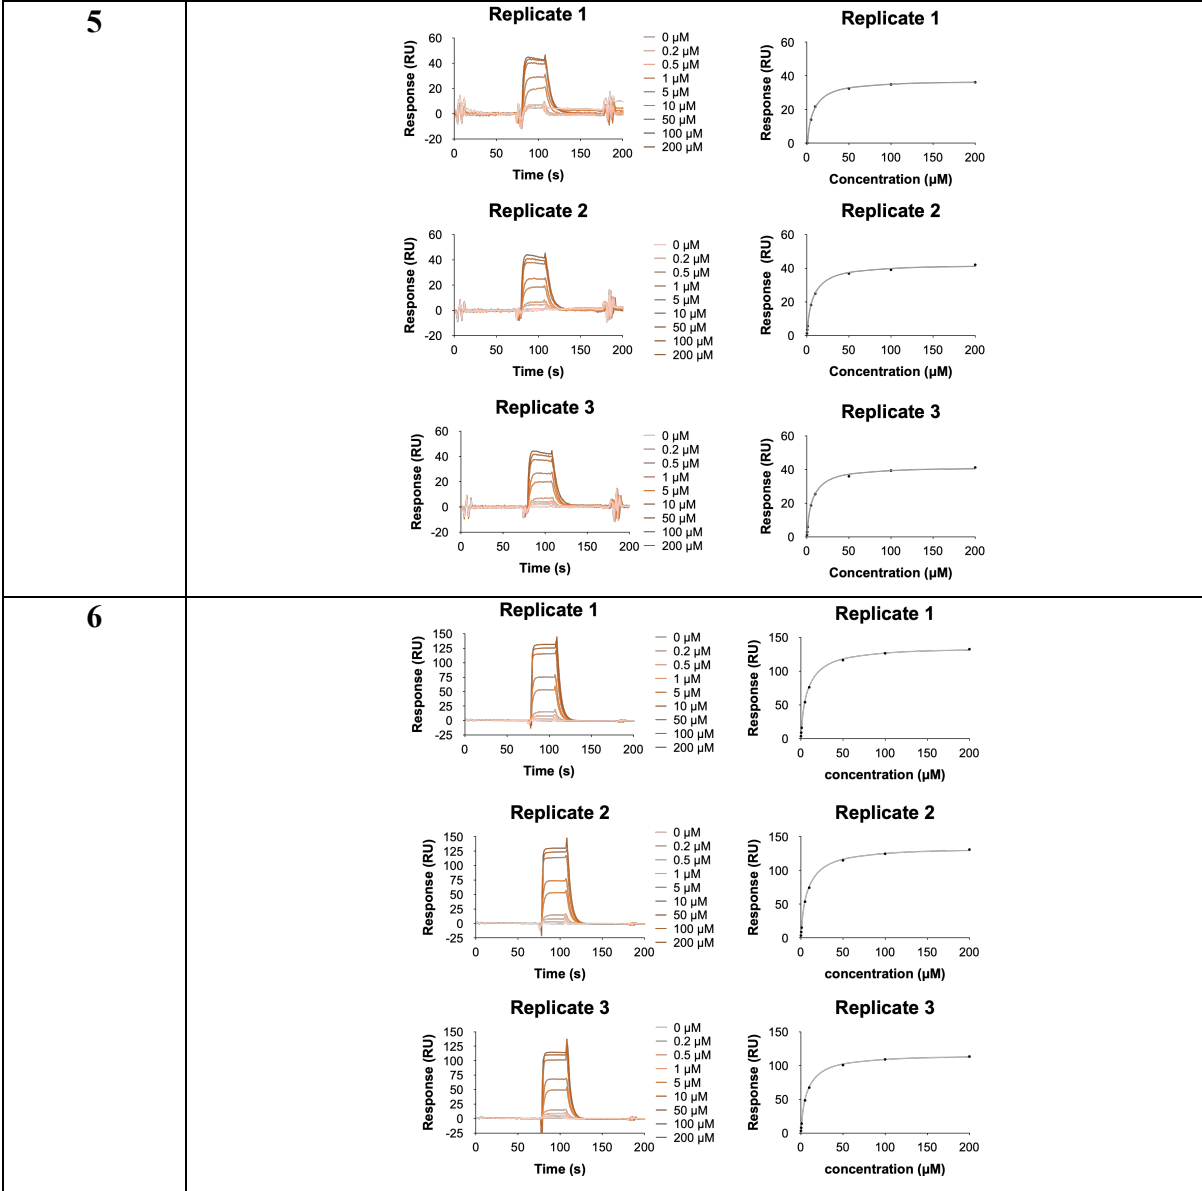

7

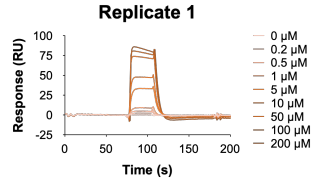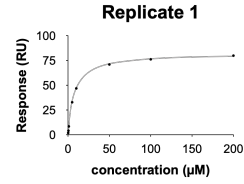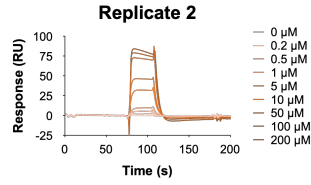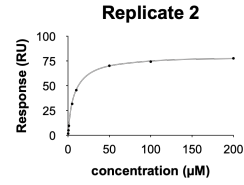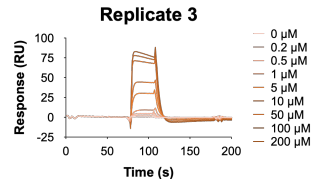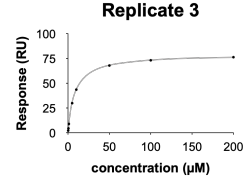

8

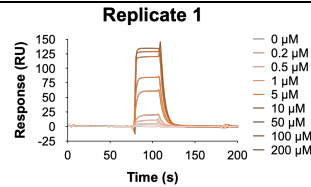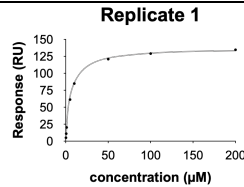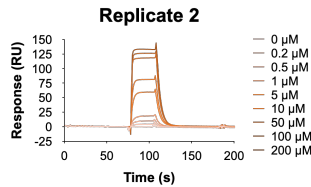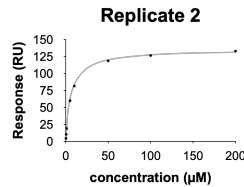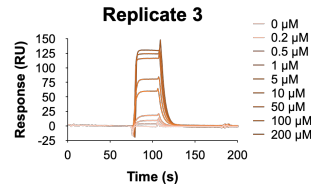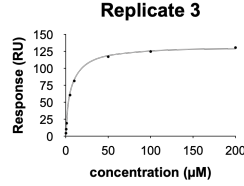

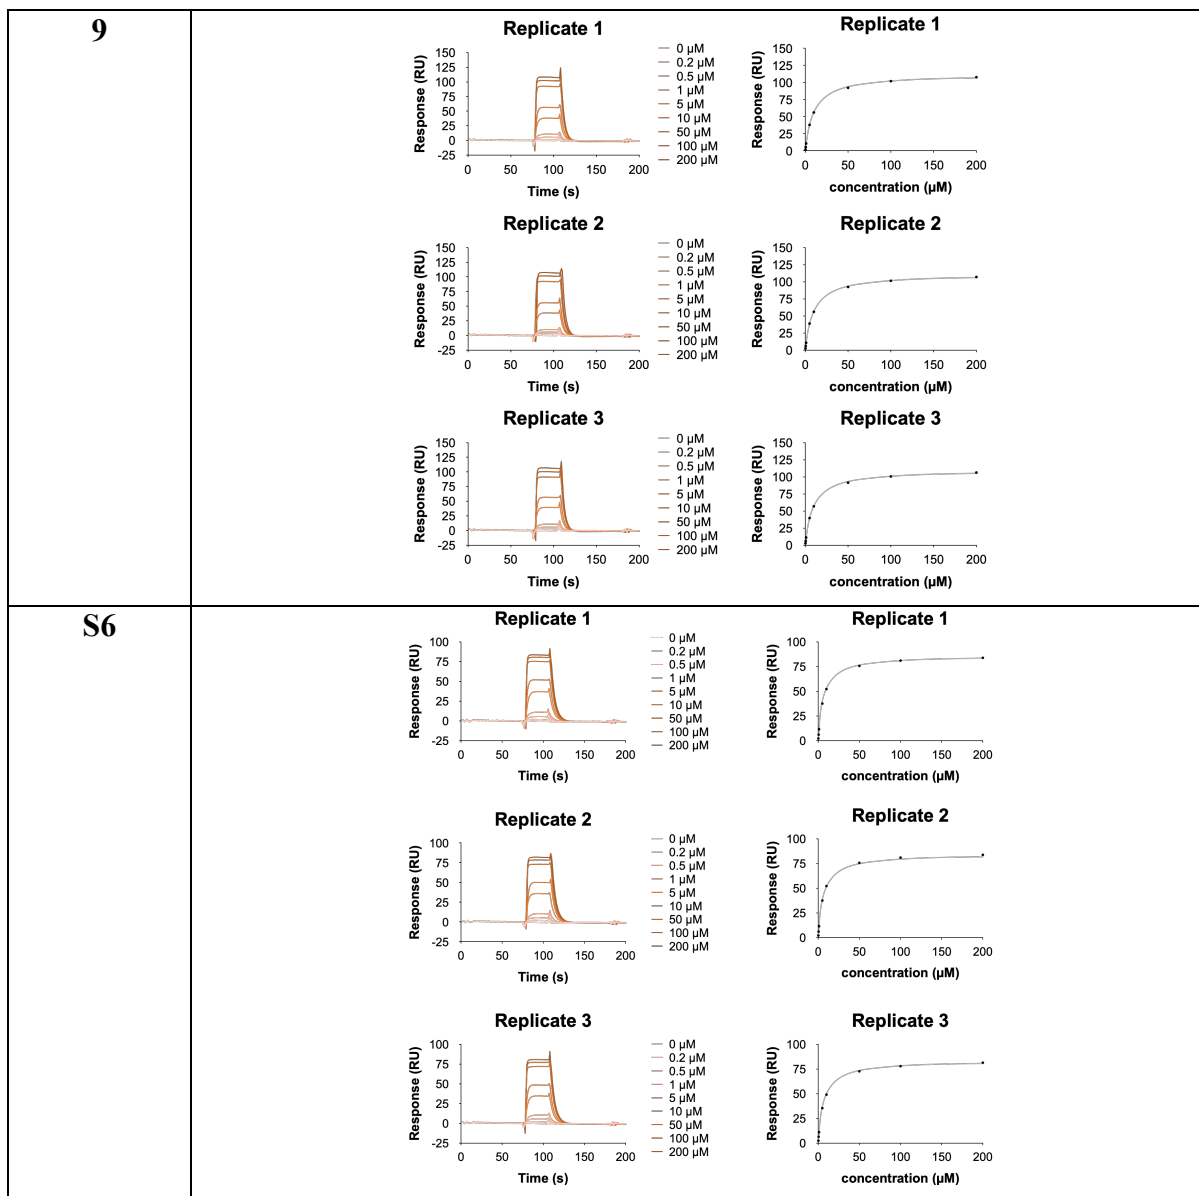

539

540 **Figure S3:** Individual sensorgrams and fits of all replicates for binding to LecA.

541

542 **X-Ray Crystallography**

543

544 **Table S3.** X-ray data collection and processing of LecA in complex with **1**

| PDB code                                                                      | 7FIO                                          |
|-------------------------------------------------------------------------------|-----------------------------------------------|
| <b>Data Collection</b>                                                        |                                               |
| <b>Beamline</b>                                                               | PROXIMA1 (SOLEIL)                             |
| <b>Wavelength (Å)</b>                                                         | 0.9786                                        |
| <b>Detector</b>                                                               | EigerX-16M                                    |
| <b>Resolution (Å)<sup>a</sup></b>                                             | 47.29-1.50 (1.53-1.50)                        |
| <b>Space Group</b>                                                            | P2 <sub>1</sub> 2 <sub>1</sub> 2 <sub>1</sub> |
| <b>a, b, c (Å)</b>                                                            | 49.60 52.68 156.97                            |
| <b>α, β, γ (°)</b>                                                            | 90.0,90.0 ,90.0                               |
| <b>Total observations</b>                                                     | 690,166                                       |
| <b>Unique reflections</b>                                                     | 66,700                                        |
| <b>Multiplicity<sup>a</sup></b>                                               | 10.3 (9.3)                                    |
| <b>Mean I/σ(I)<sup>a</sup></b>                                                | 13.5 (1.7)                                    |
| <b>Completeness (%)<sup>a</sup></b>                                           | 99.8 (99.1)                                   |
| <b>R<sub>merge</sub><sup>a,b</sup></b>                                        | 0.089 (0.999)                                 |
| <b>CC<sub>1/2</sub><sup>a,c</sup></b>                                         | 1.0 (0.6)                                     |
| <b>Refinement</b>                                                             |                                               |
| <b>Reflections: working/free<sup>d</sup></b>                                  | 66,623/3,419                                  |
| <b>R<sub>work</sub>/ R<sub>free</sub><sup>e</sup></b>                         | 0.177/0.212                                   |
| <b>Ramachandran plot:<br/>allowed/favoured/outliers (%)</b>                   | 3/97/0                                        |
| <b>R.m.s. bond deviations (Å)</b>                                             | 0.0162                                        |
| <b>R.m.s. angle deviations (°)</b>                                            | 1.896                                         |
| <b>Mean B-factors: protein/ligand<sup>f</sup>/<br/>/water (Å<sup>2</sup>)</b> | 20/41/29                                      |

545 <sup>a</sup> Values for the outer resolution shell are given in parentheses.546 <sup>b</sup>  $R_{\text{merge}} = \sum_{\text{hkl}} \sum_i |I_i(\text{hkl}) - \langle I(\text{hkl}) \rangle| / \sum_{\text{hkl}} \sum_i I_i(\text{hkl})$ .547 <sup>c</sup> CC<sub>1/2</sub> is the correlation coefficient between symmetry-related intensities taken from random halves of the  
548 dataset.549 <sup>d</sup> The data set was split into "working" and "free" sets consisting of 95 and 5% of the data, respectively.  
550 The free set was not used for refinement.551 <sup>e</sup> The R-factors  $R_{\text{work}}$  and  $R_{\text{free}}$  are calculated as follows:  $R = \sum (|F_{\text{obs}} - F_{\text{calc}}|) / \sum |F_{\text{obs}}|$ , where  $F_{\text{obs}}$  and  $F_{\text{calc}}$   
552 are the observed and calculated structure factor amplitudes, respectively553 <sup>f</sup> refers to ligands bound in the active site and potential surface binding sites

554

555

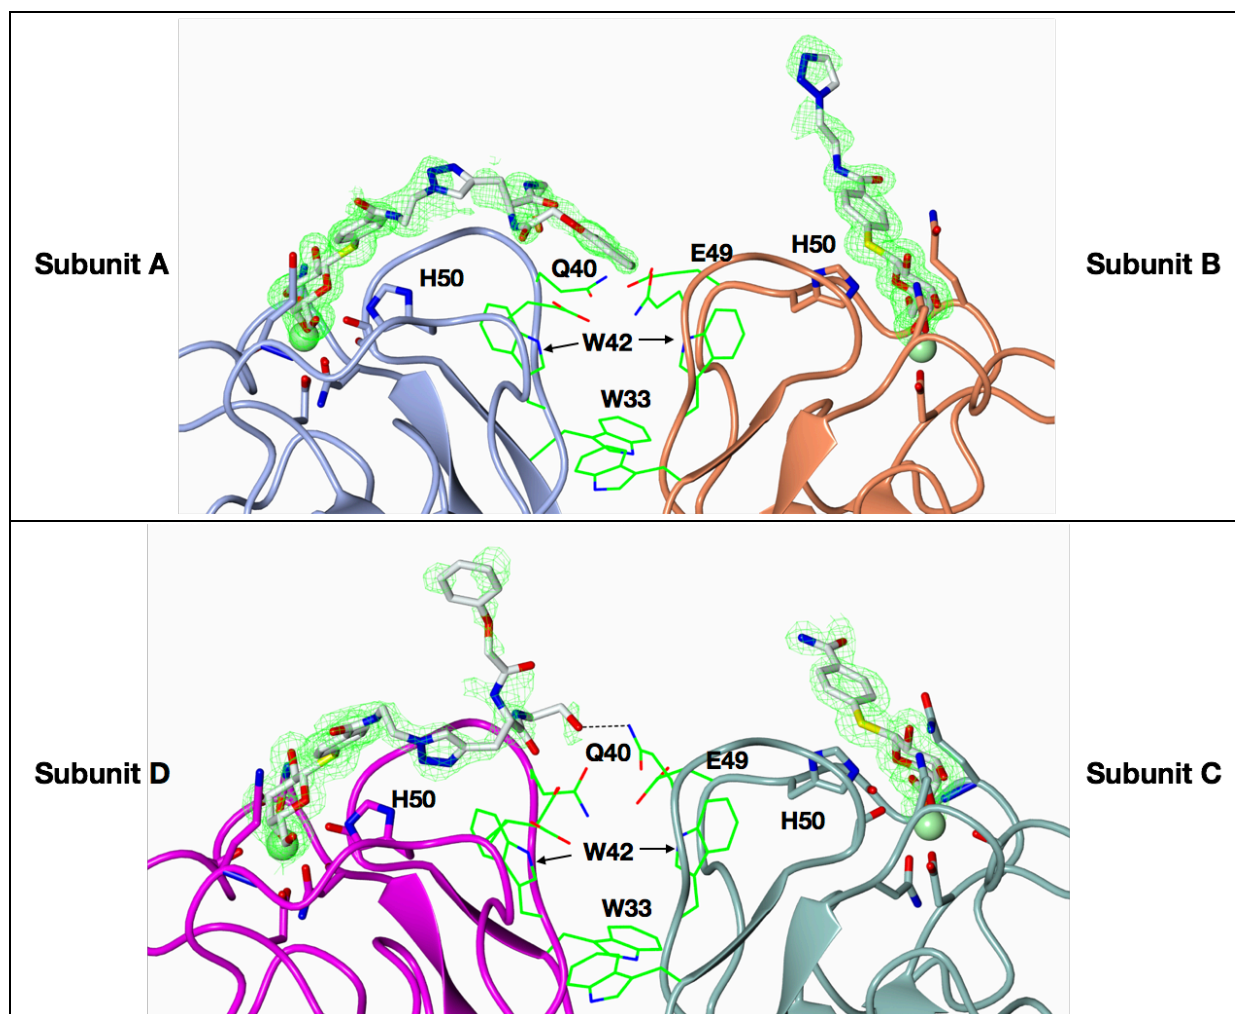

556 **Figure S4:** Co-crystal structure of compound **1** and tetrameric LecA. All carbohydrate binding  
 557 sites of the four monomers are occupied by one ligand by coordination to the calcium ion with the  
 558 galactose moiety. Subunit A shows the ligand with its side chain at the entrance of the central  
 559 pocket. Subunit B and C are not completely resolved. Subunit D shows a hydrogen bonding  
 560 between the ethanol amine function of **1** with Q40 of the neighboring subunit C.

561

562 **References**

- 563 [1] G. R. Fulmer, A. J. M. Miller, N. H. Sherden, H. E. Gottlieb, A. Nudelman, B. M. Stoltz, J.  
564 E. Bercaw, K. I. Goldberg, *Organometallics* **2010**, *29*, 2176–2179.
- 565 [2] A. Novoa, T. Eierhoff, J. Topin, A. Varrot, S. Barluenga, A. Imberty, W. Römer, N.  
566 Winssinger, *Angew. Chemie Int. Ed.* **2014**, *53*, 8885–8889.
- 567 [3] S. Kuhaudomlarp, E. Siebs, E. Shanina, J. Topin, I. Joachim, P. da Silva Figueiredo  
568 Celestino Gomes, A. Varrot, D. Rognan, C. Rademacher, A. Imberty, A. Titz, *Angew.*  
569 *Chemie Int. Ed.* **2021**, *60*, 8104-8114.
- 570 [4] K. Anbarasu, K. K. Ilavenil, *Asian J. Chem.* **2018**, *30*, 2238–2240.
- 571 [5] D. Li, S. Xiong, T. Guo, D. Shu, H. Xiao, G. Li, D. Guo, *Dye. Pigment.* **2018**, *158*, 28–35.
- 572 [6] P. J. Machín, D. N. Hurst, R. M. Bradshaw, L. C. Blaber, D. T. Burden, A. D. Fryer, R. A.  
573 Melarange, C. Shivdasani, *J. Med. Chem.* **1983**, *26*, 1570–1576.
- 574 [7] T. E. Kristensen, K. Vestli, M. G. Jakobsen, F. K. Hansen, T. Hansen, *J. Org. Chem.* **2010**,  
575 *75*, 1620–1629.
- 576 [8] J. C. Sheehan, G. L. Boshart, P. A. Cruickshank, *J. Org. Chem.* **1961**, *26*, 2525–2528.  
577



578 Spectra

ES\_71\_dry.10.fid

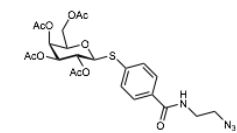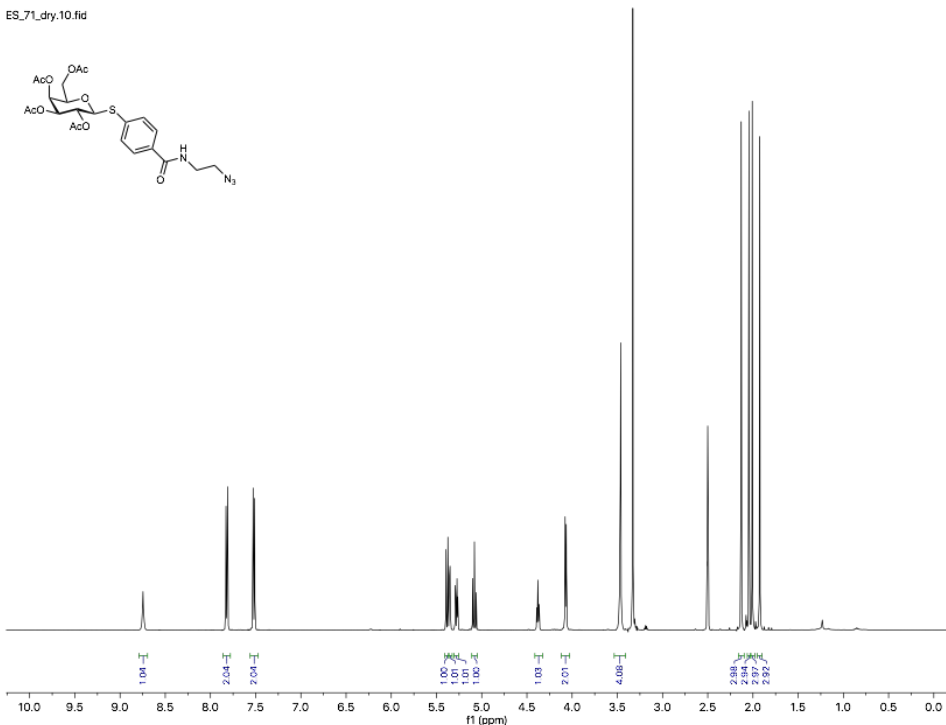

579

ES\_71\_dry.11.fid

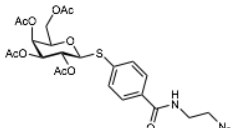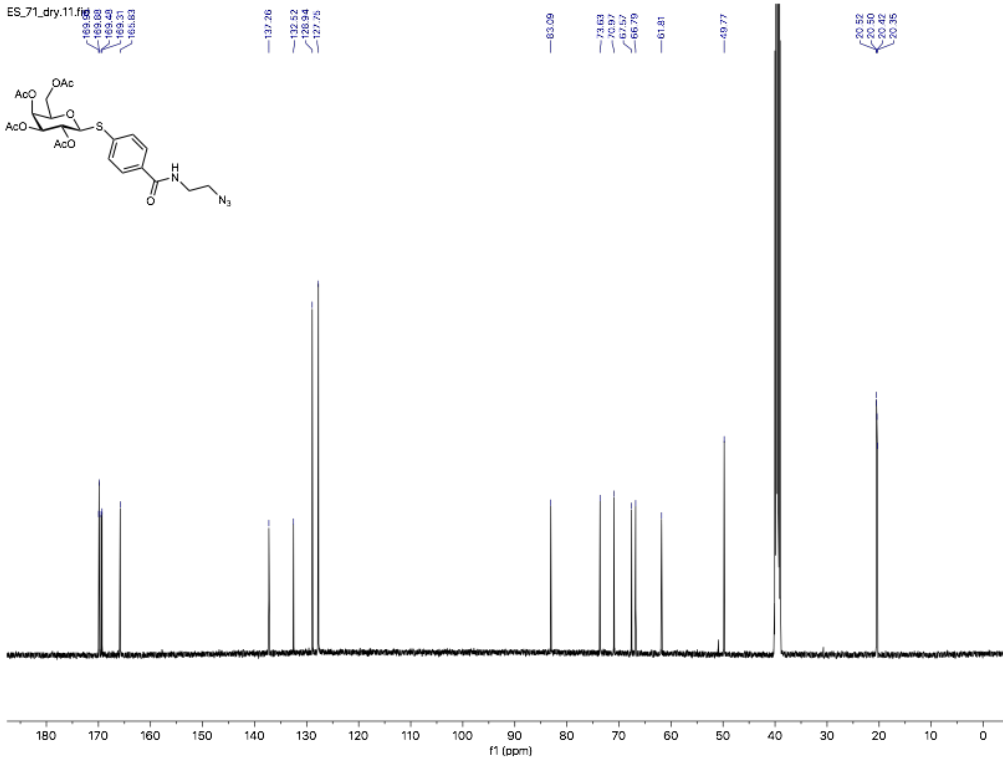

580

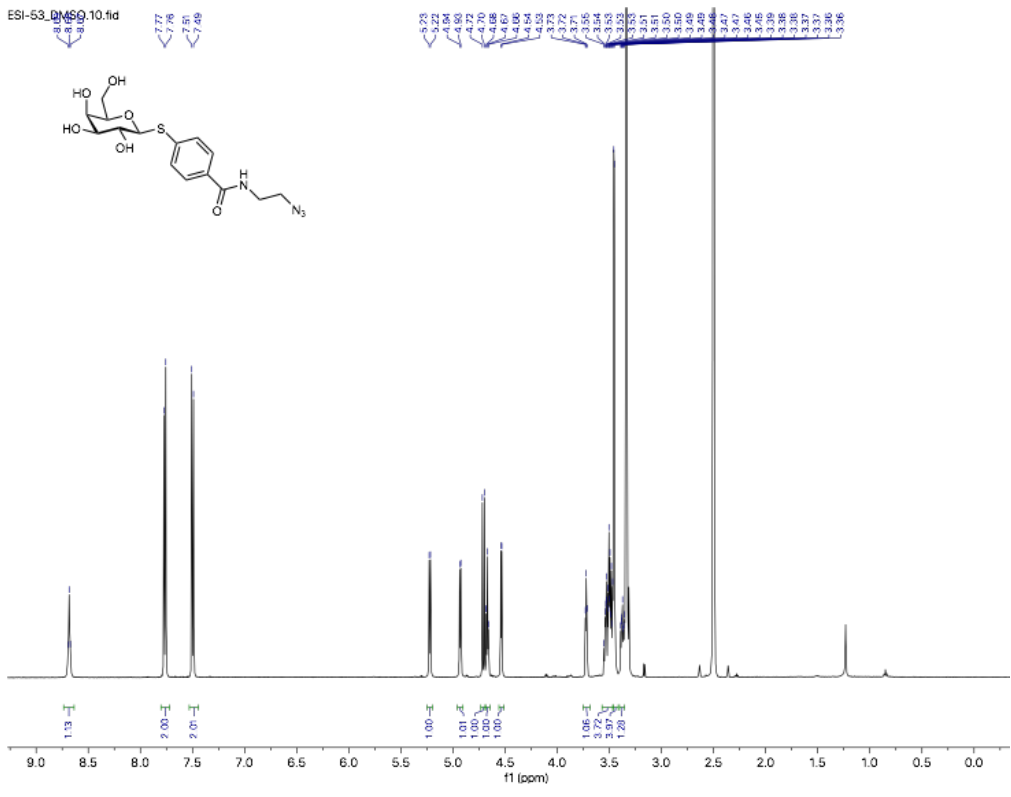

581

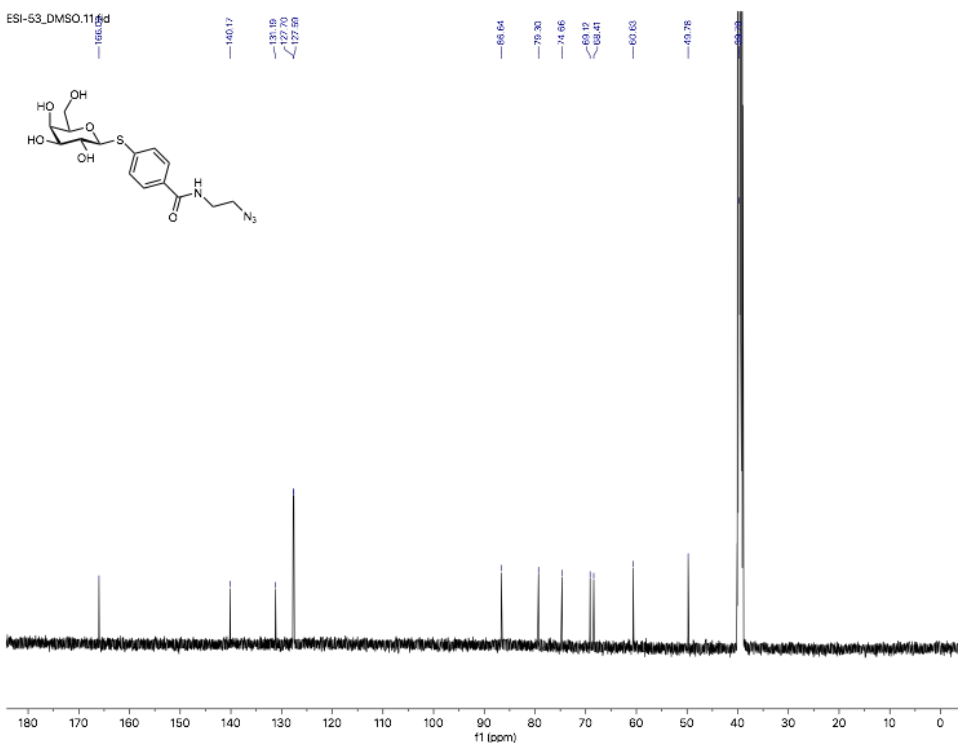

582

CF0-001.10.fid

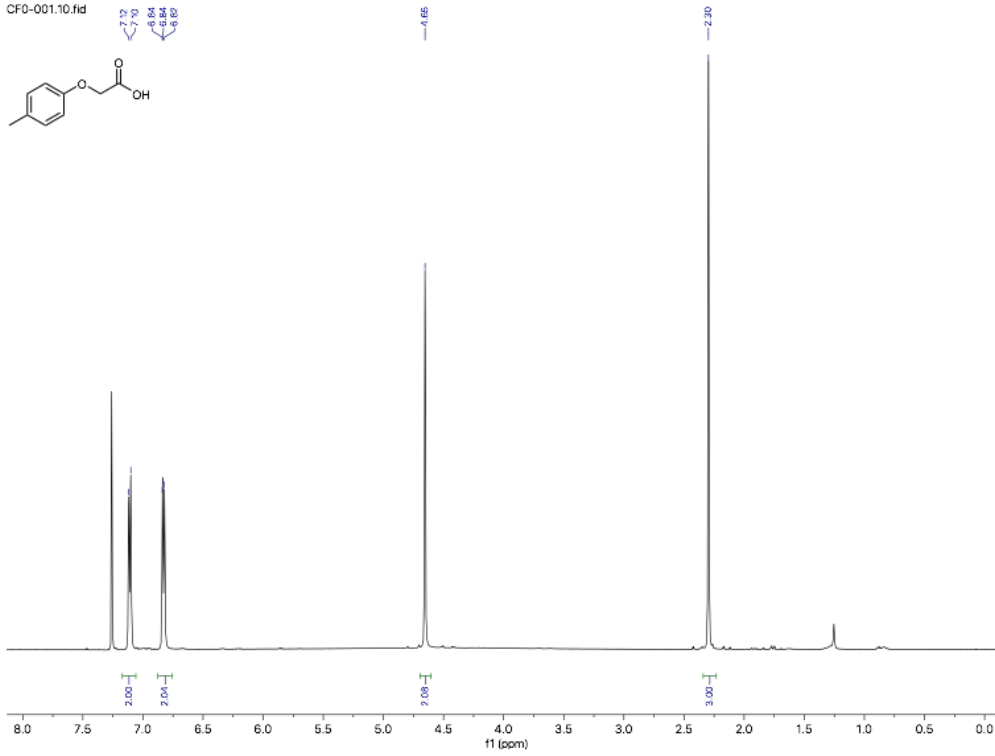

583

CF0-001.13.fid

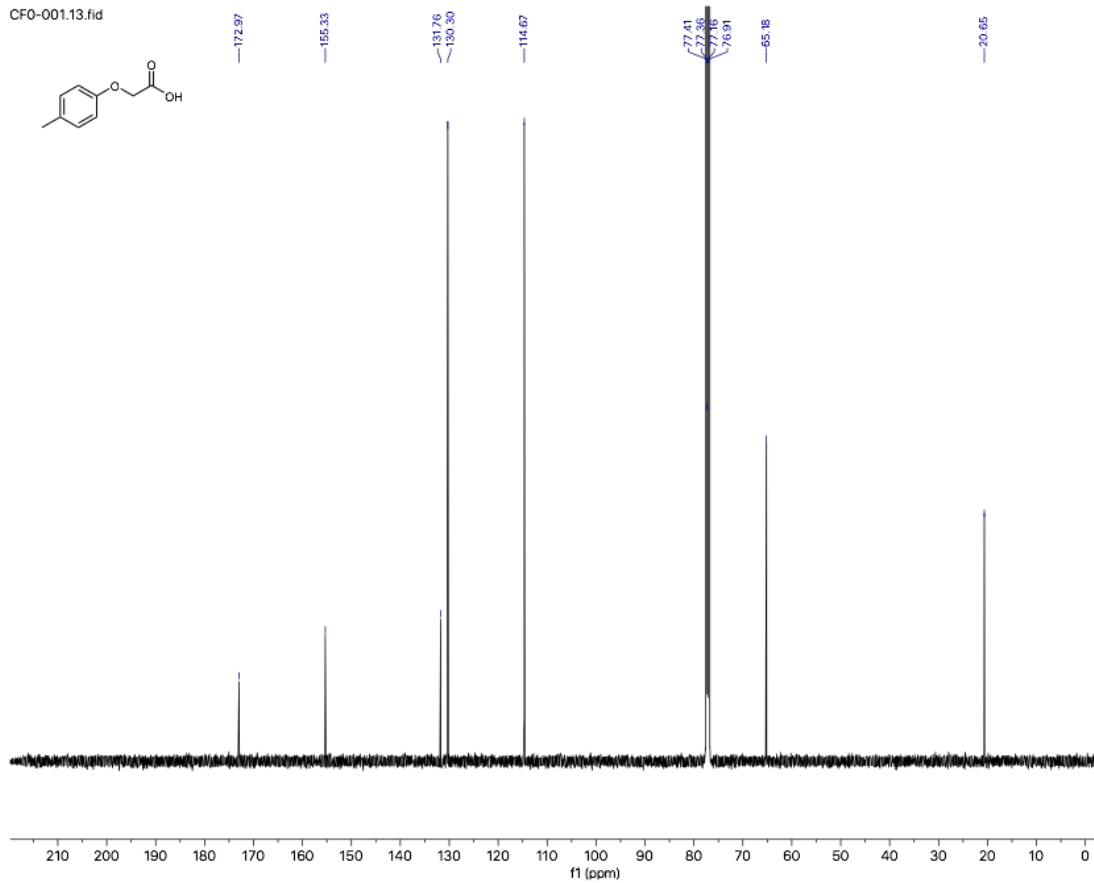

584



ES\_69.10.fid

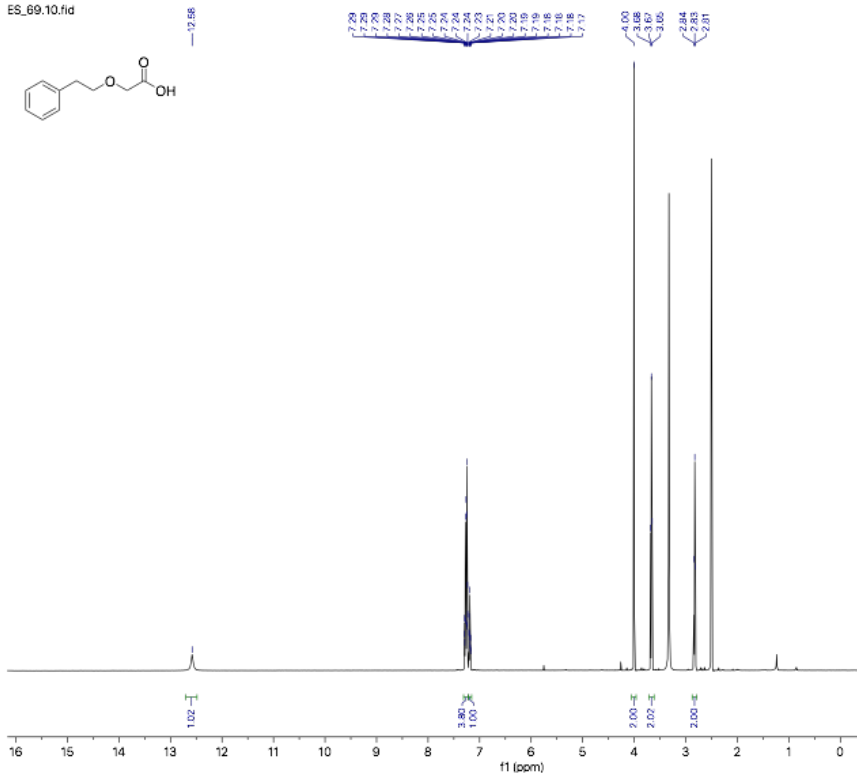

587

ES\_69.12.fid

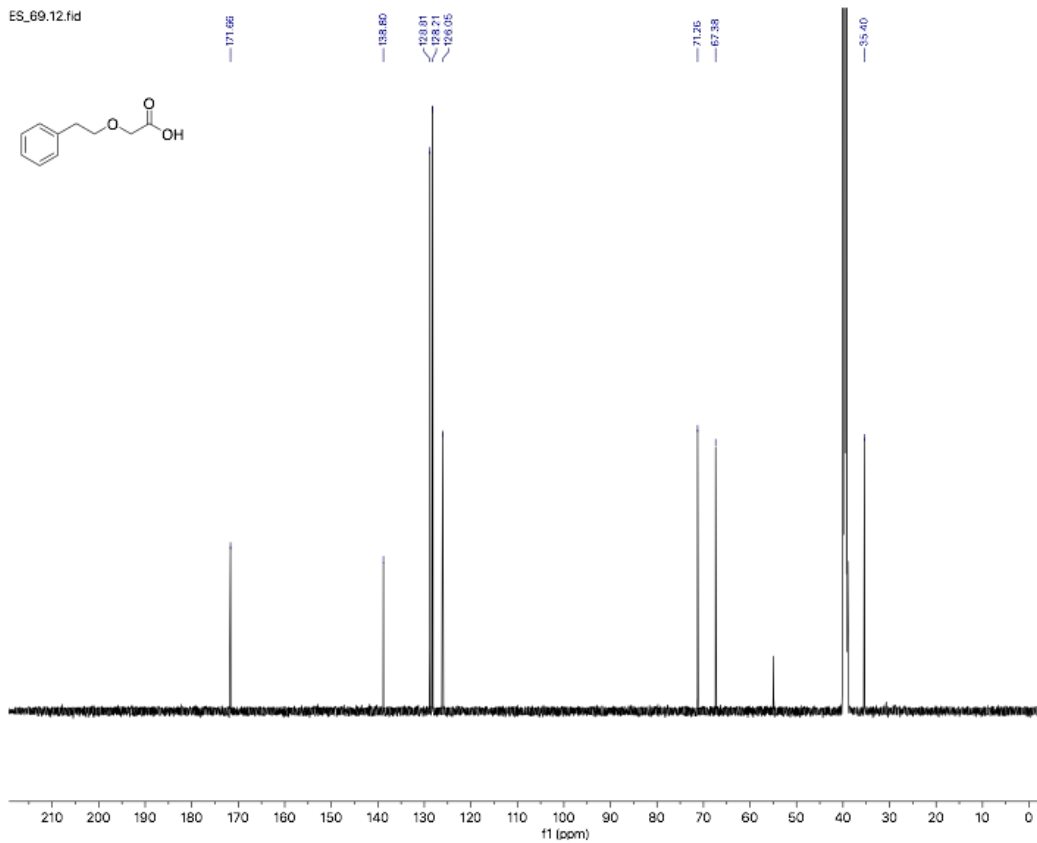

588

ES\_68.20.fid

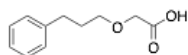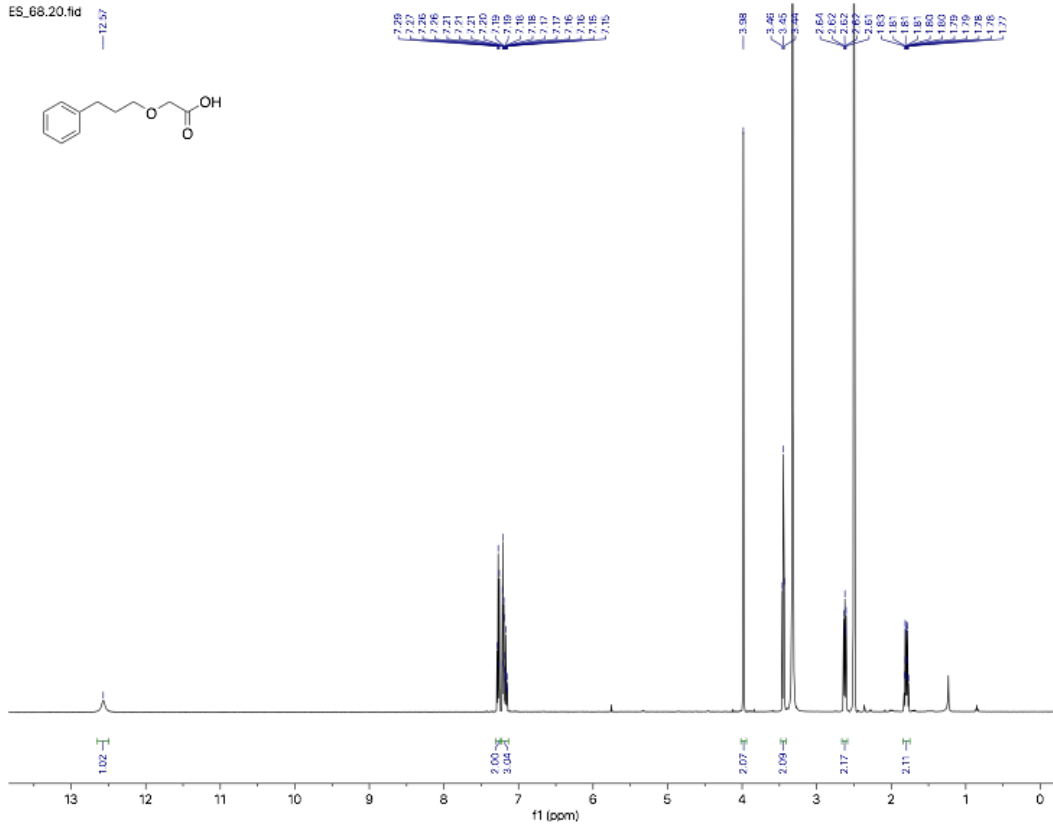

589

ES\_68.22.fid

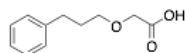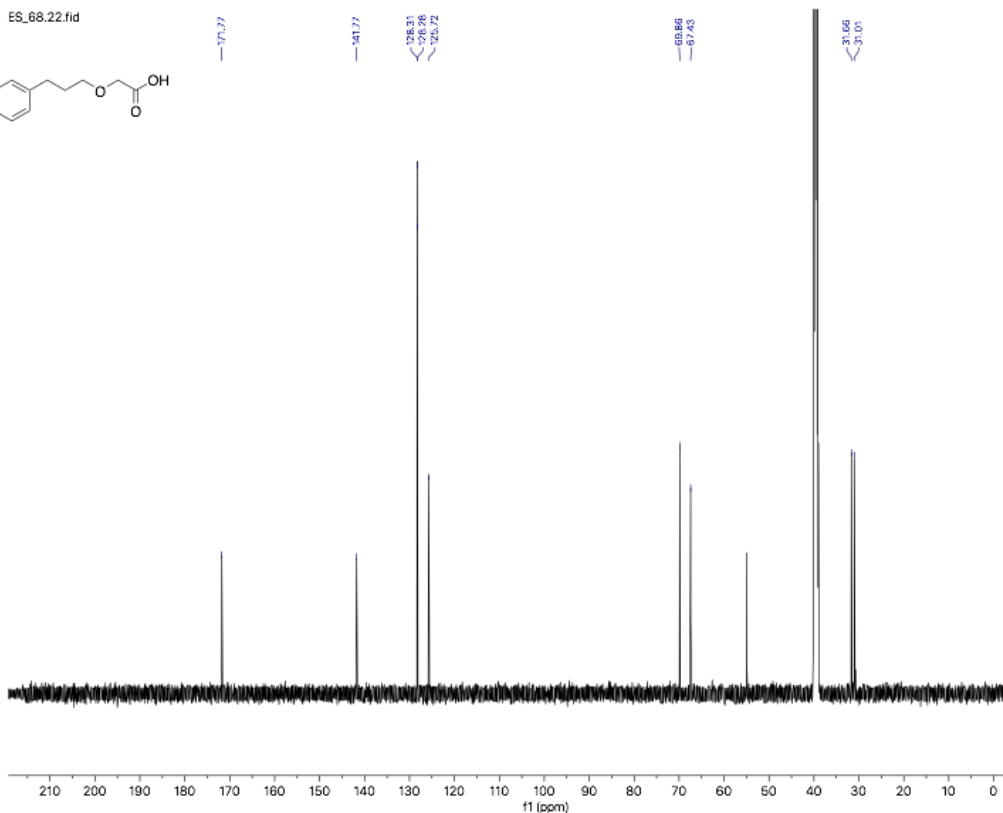

590

ES\_70.10.fid

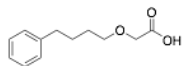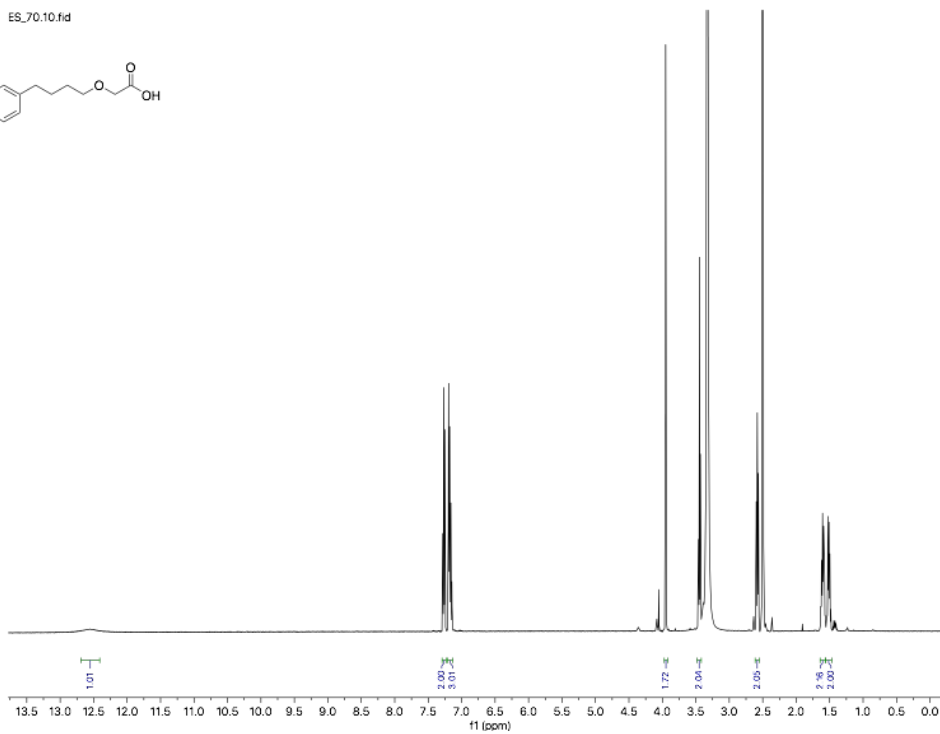

591

ES\_70.12.fid

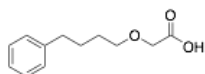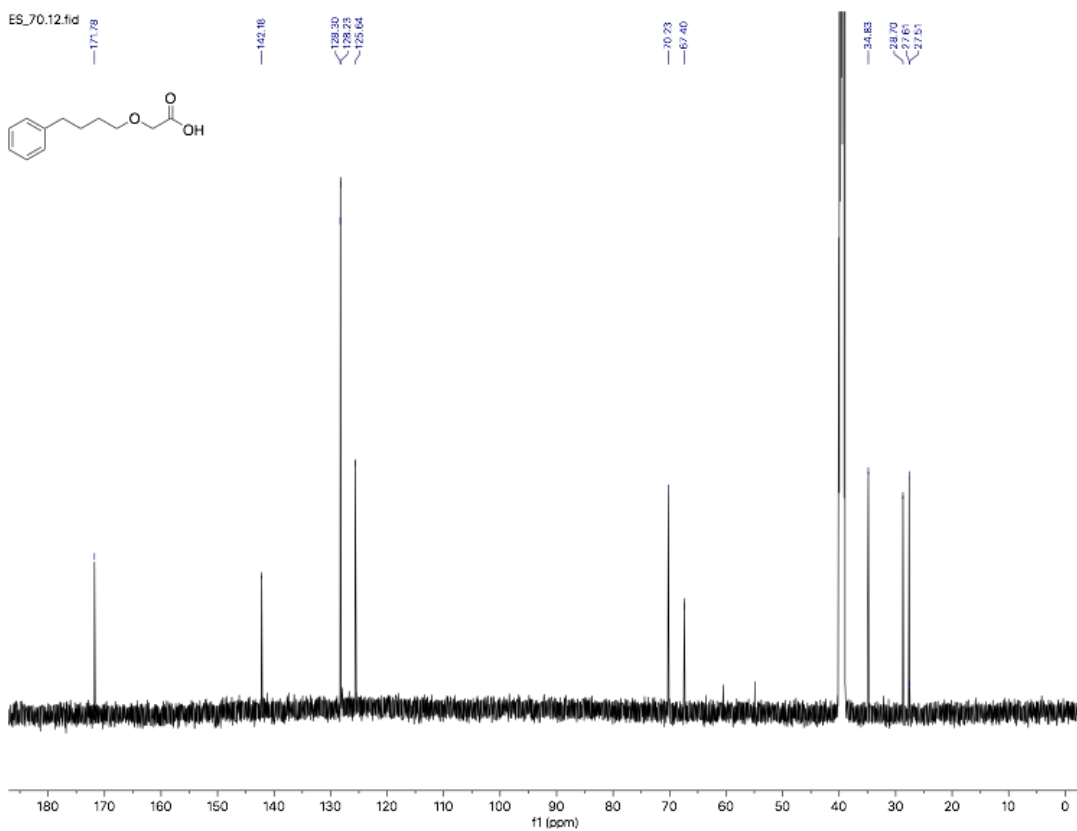

592

ES\_19\_new.10.fid

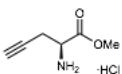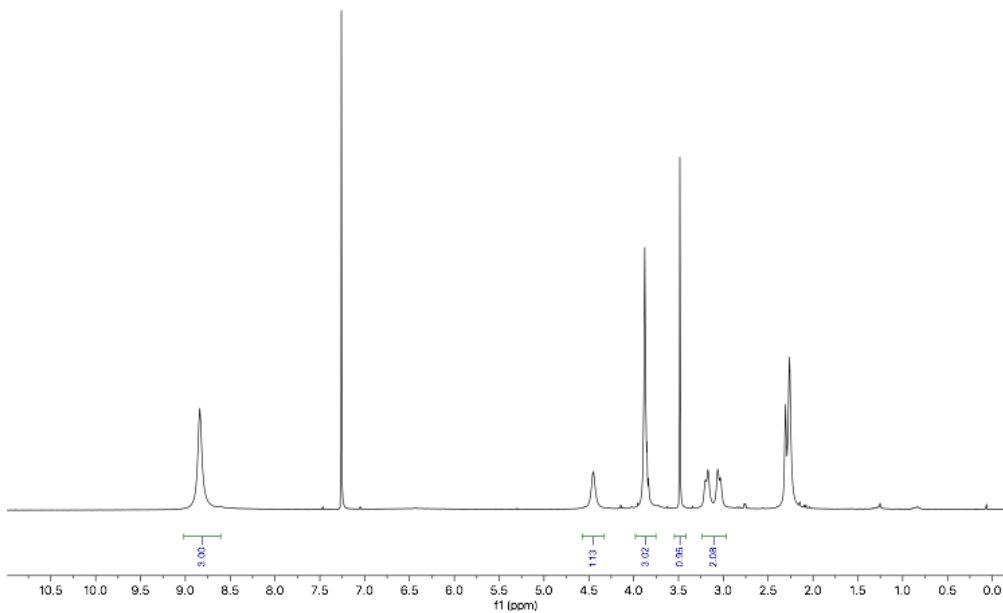

593

ES\_19\_new.11.fid

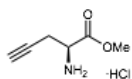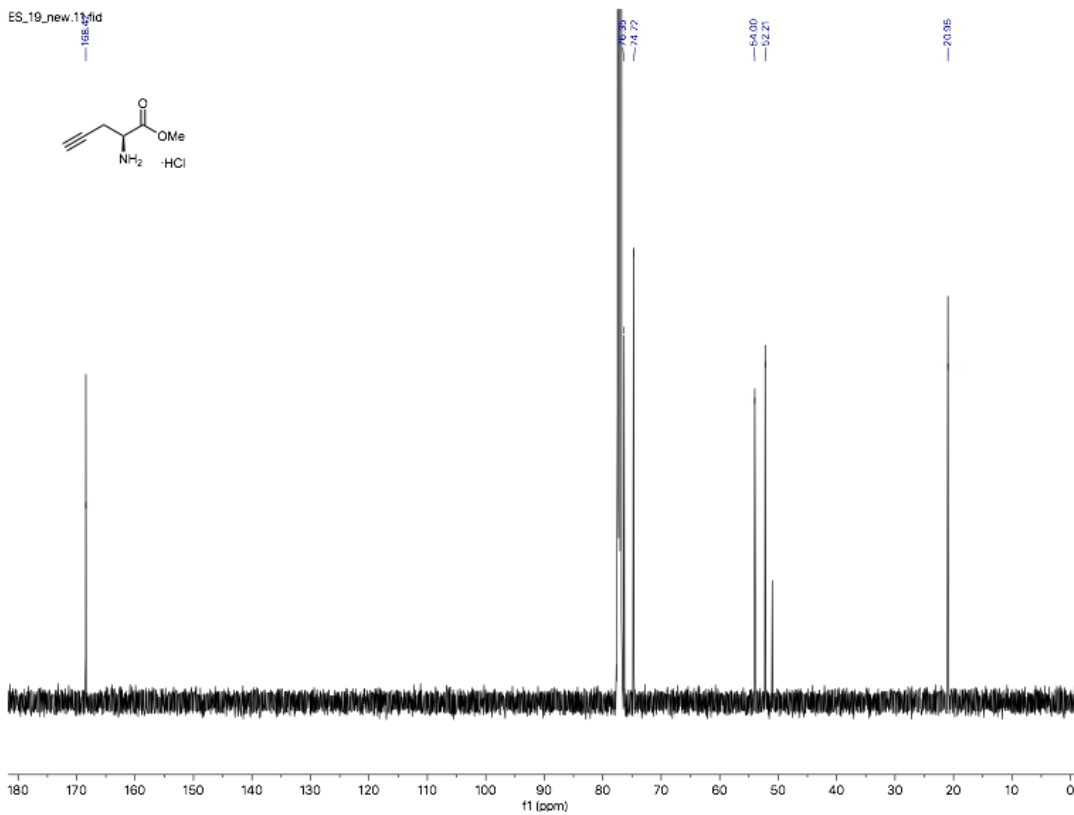

594



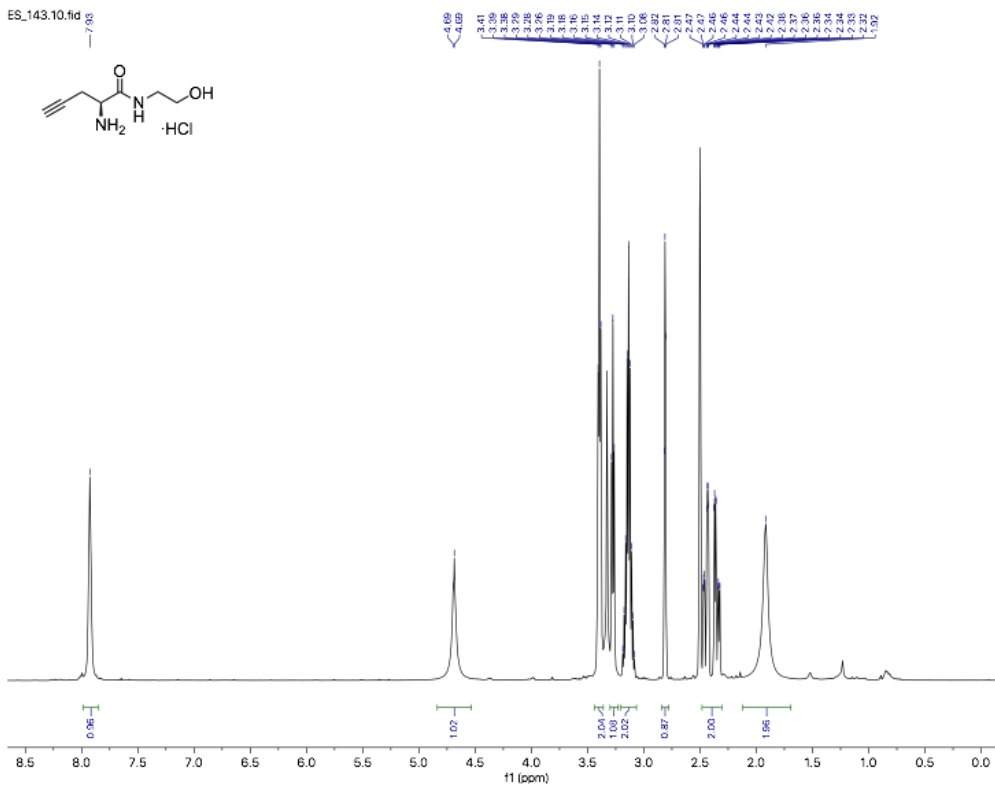

595

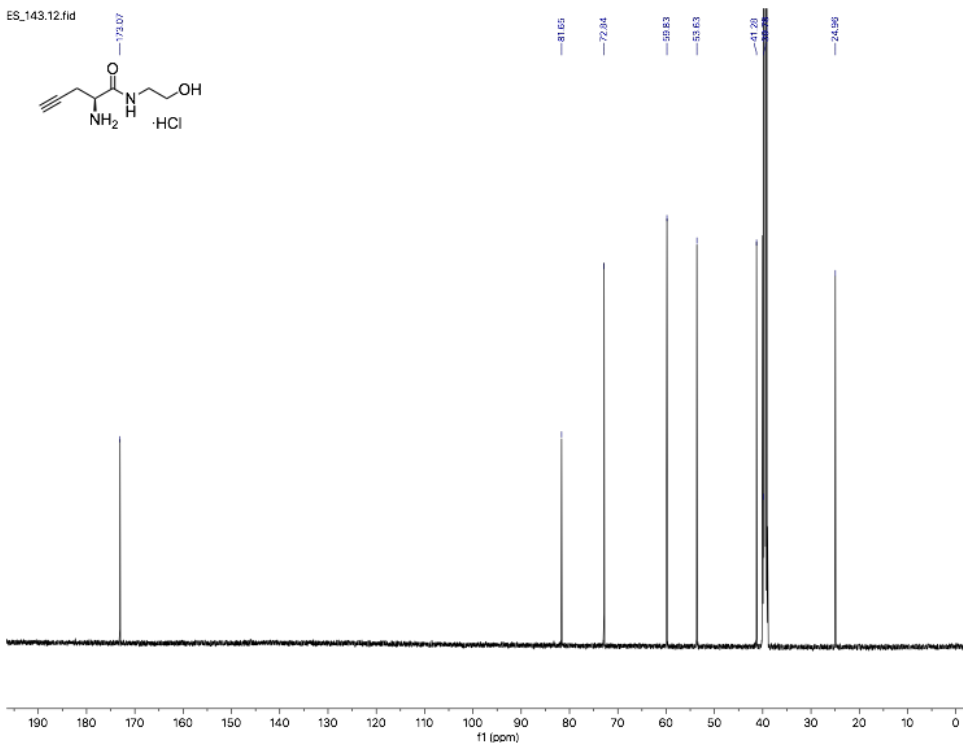

596

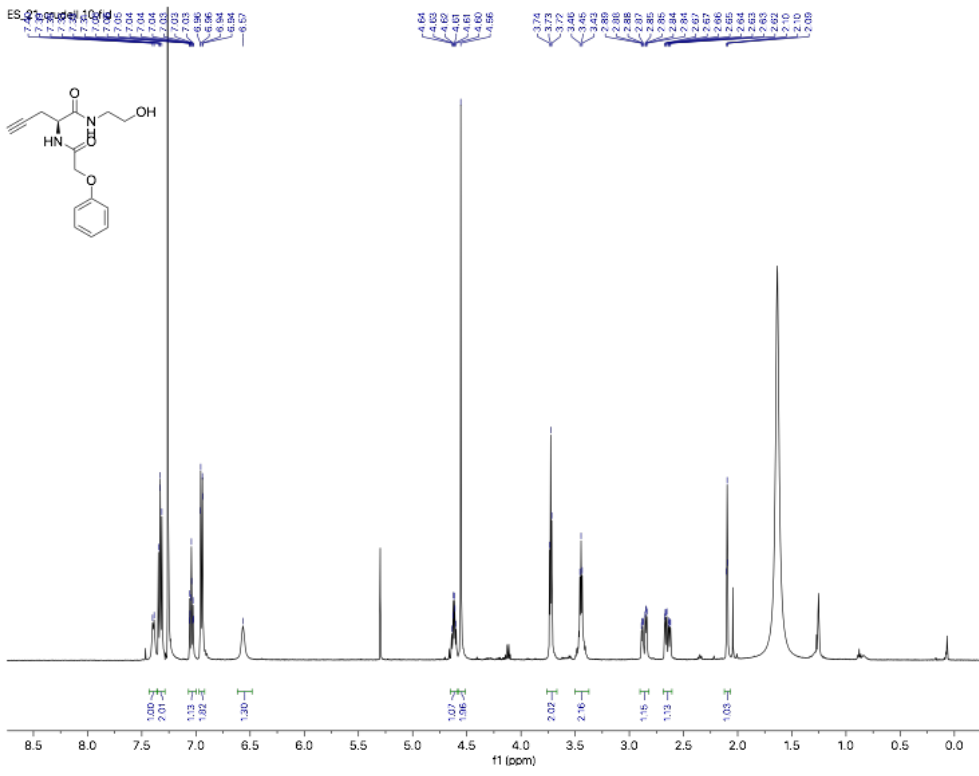

597

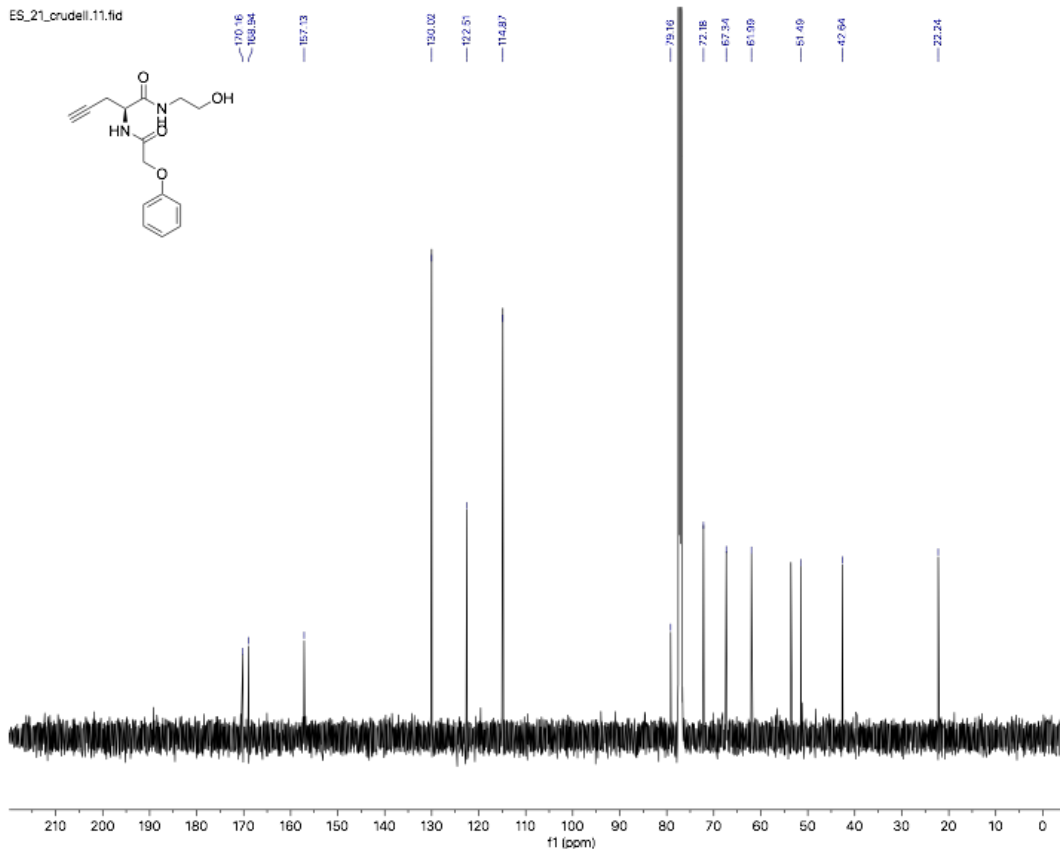

598



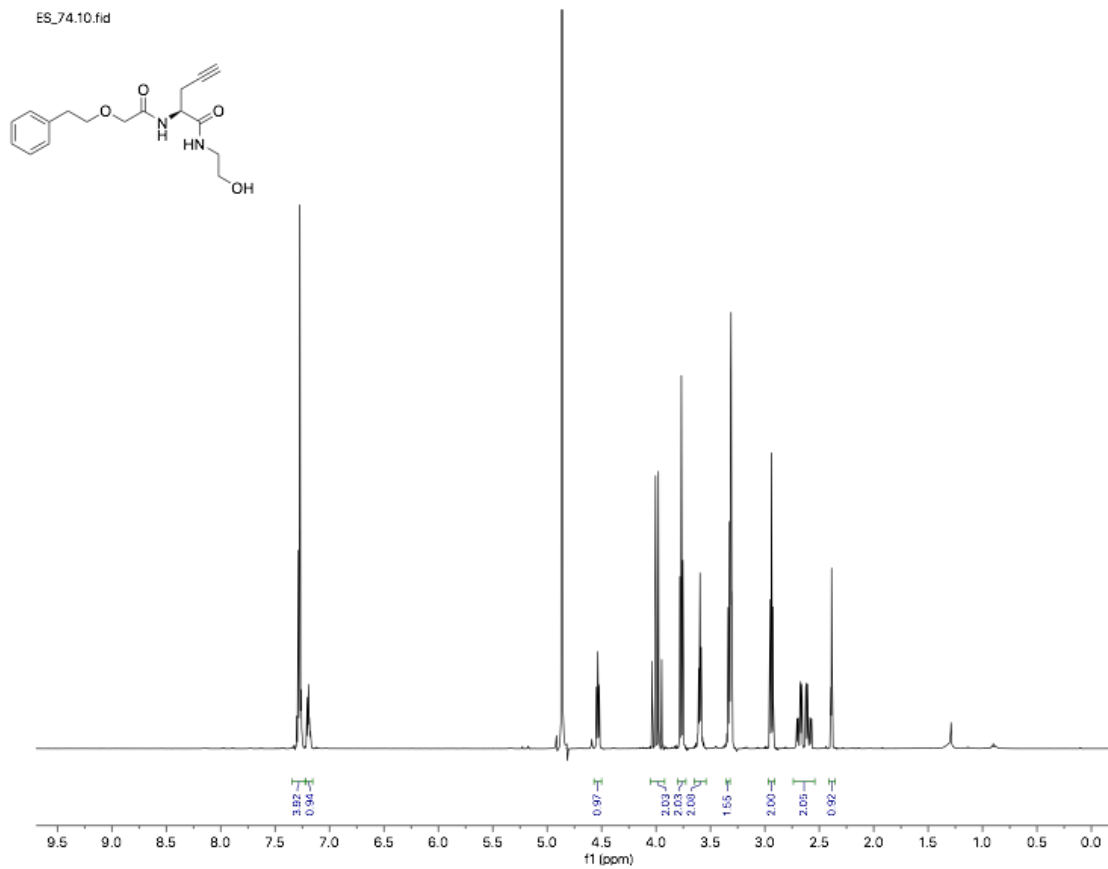

601

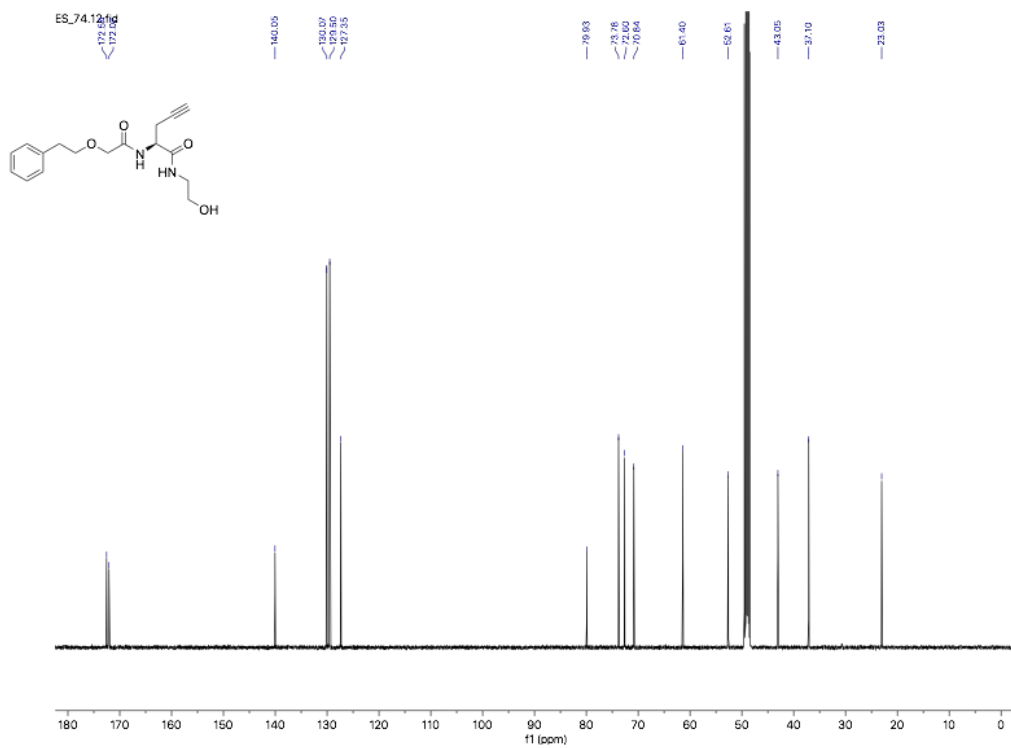

602

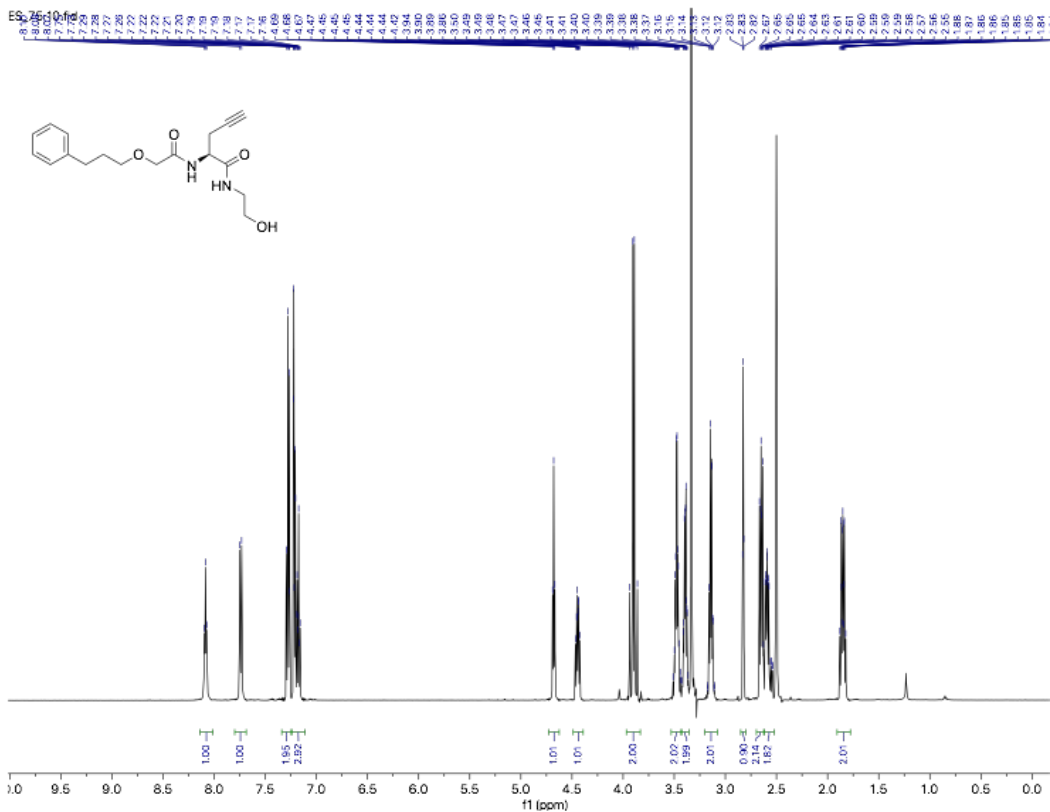

603

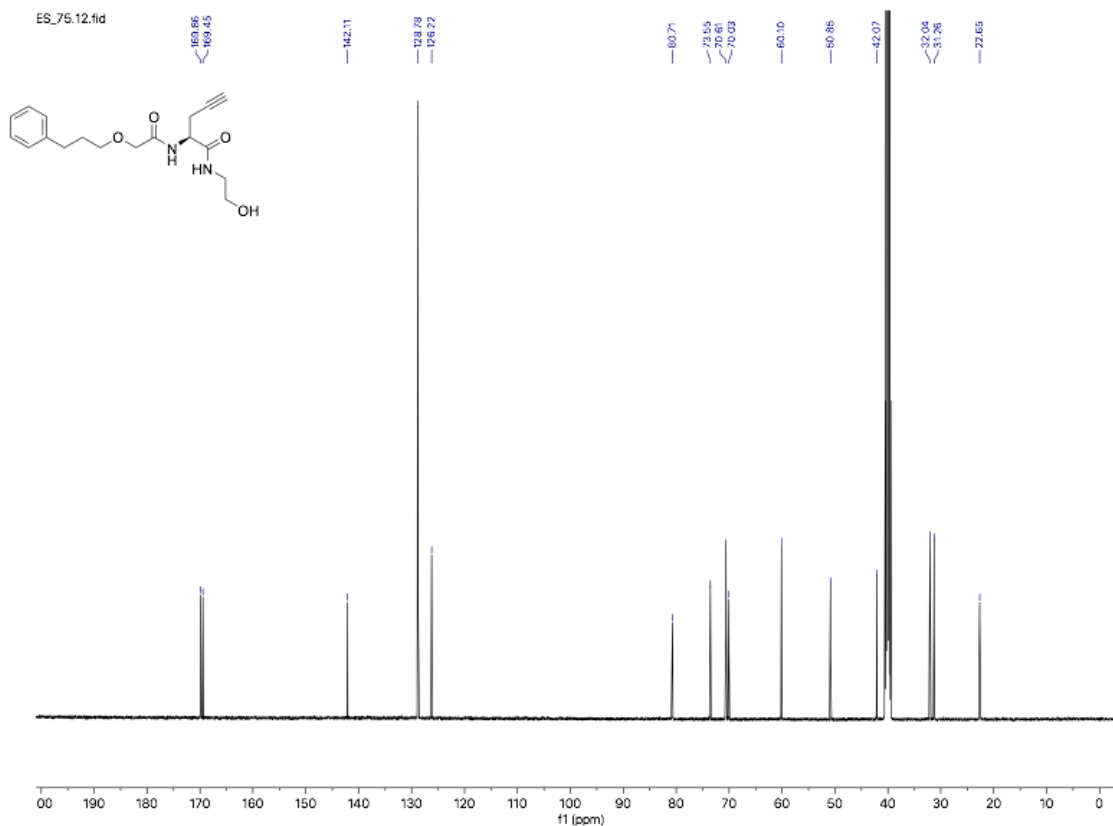

604

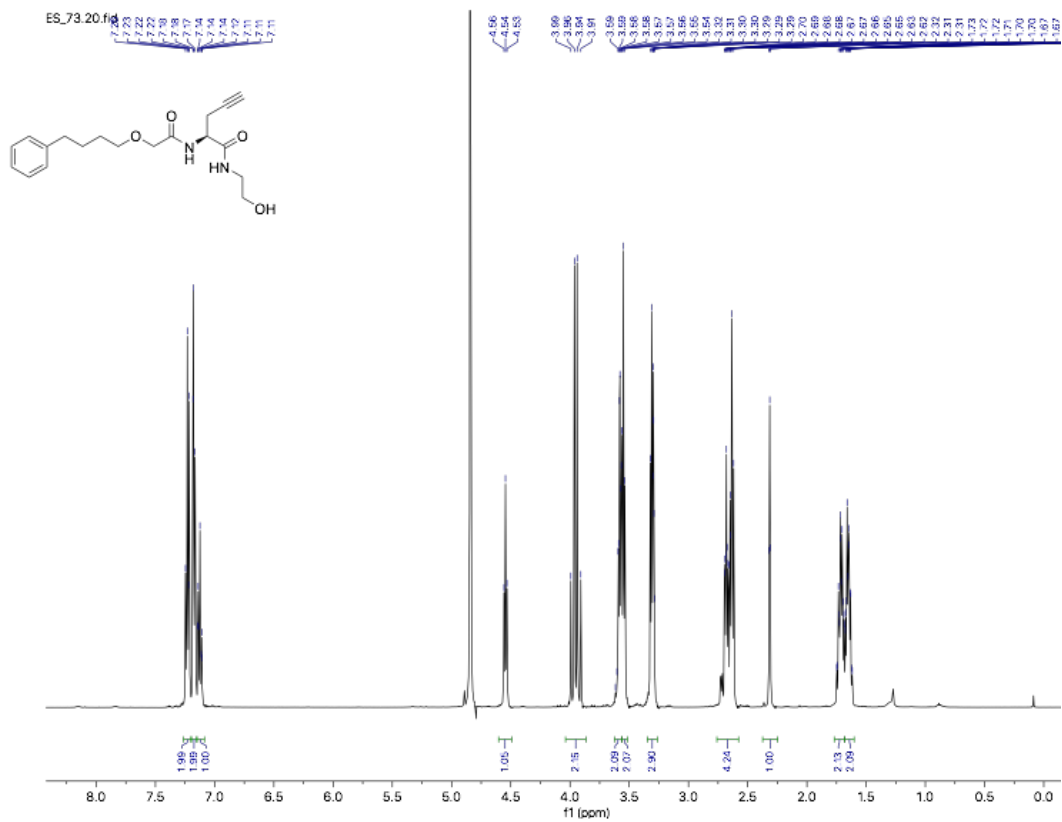

605

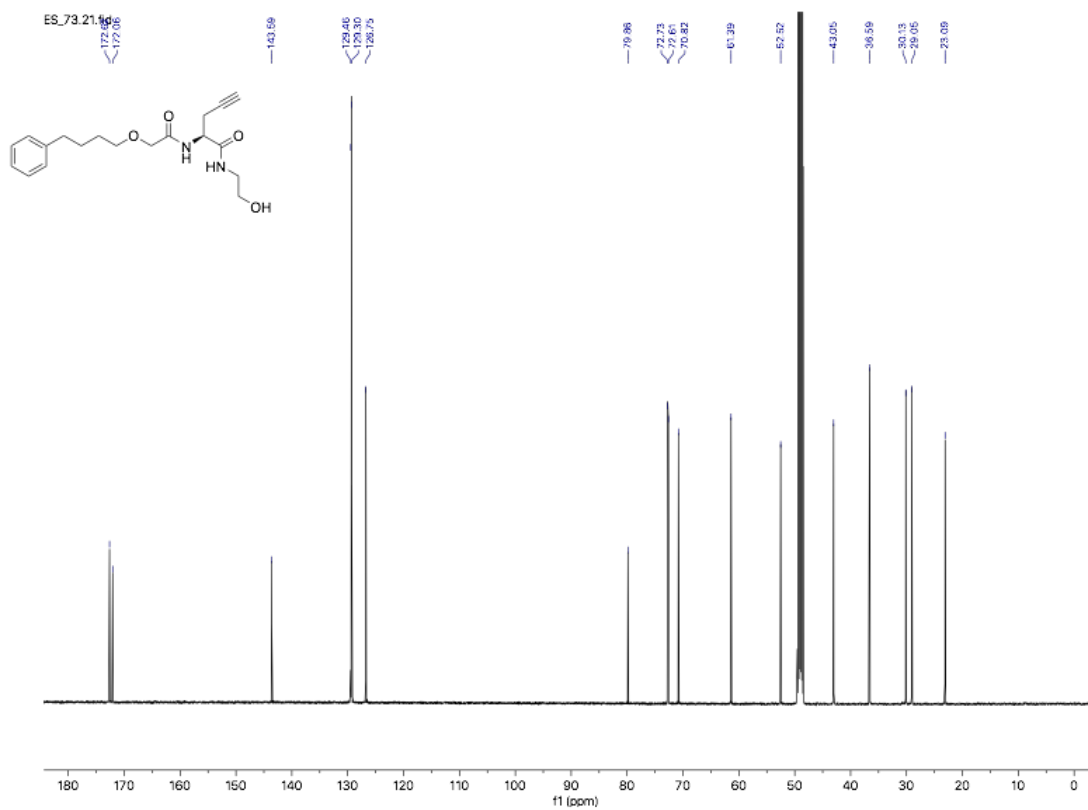

606

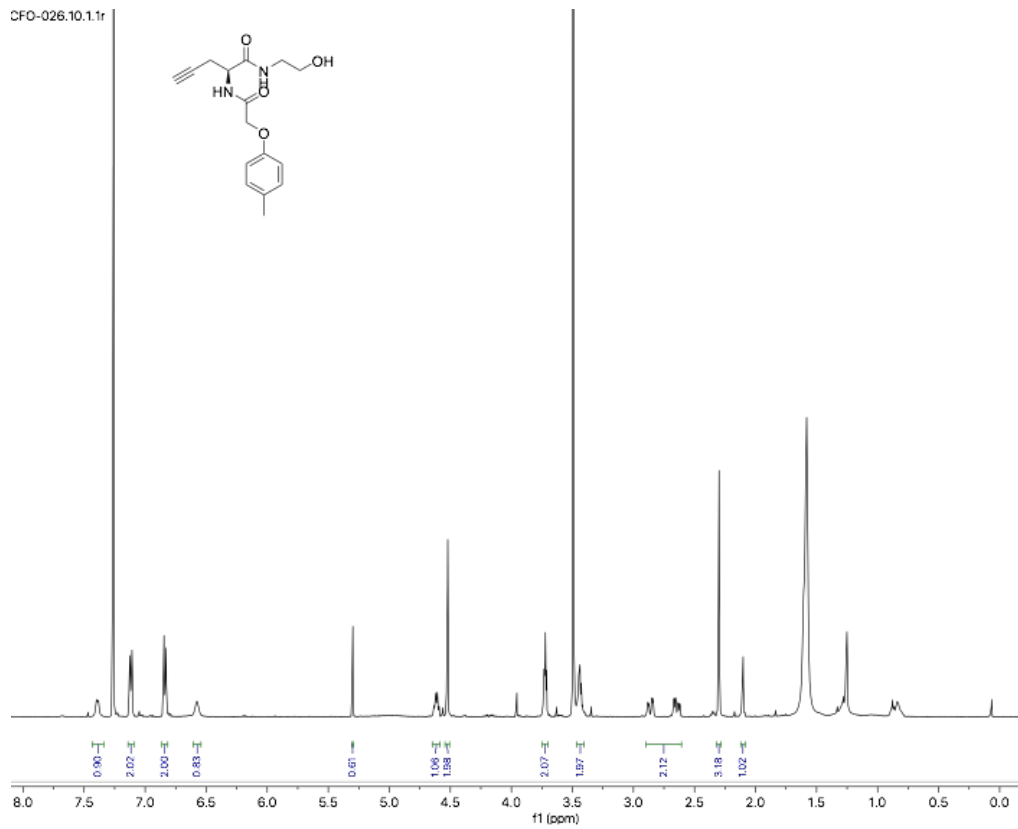

607

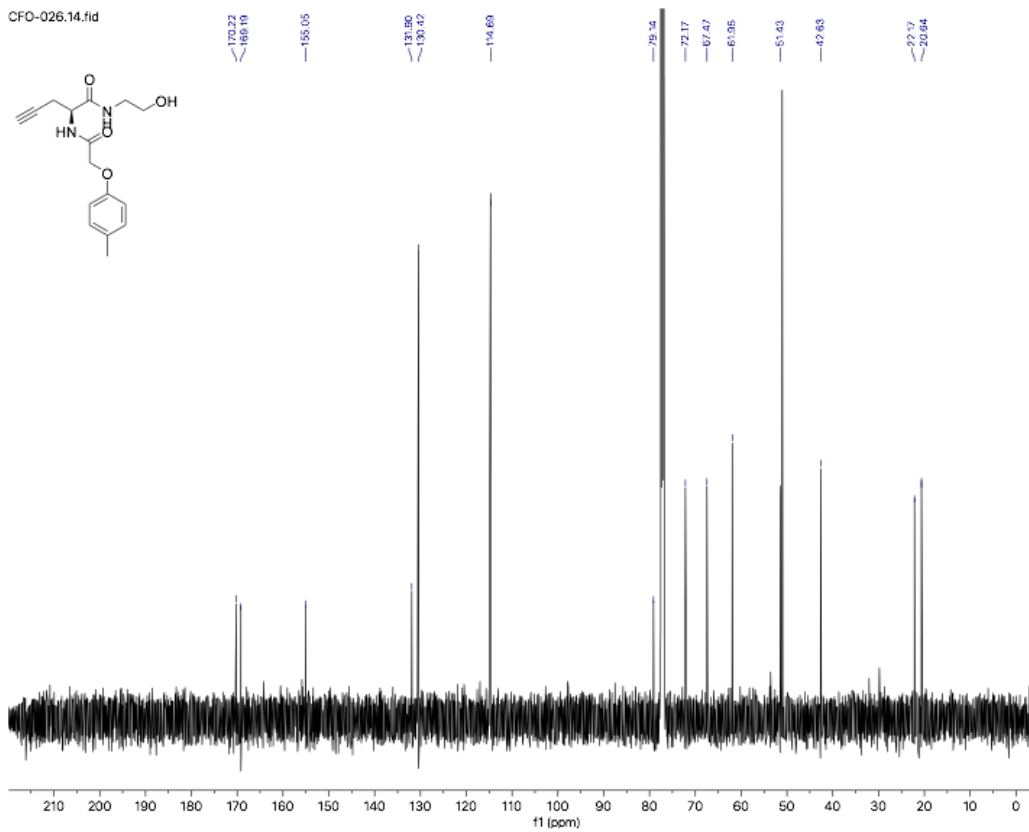

608

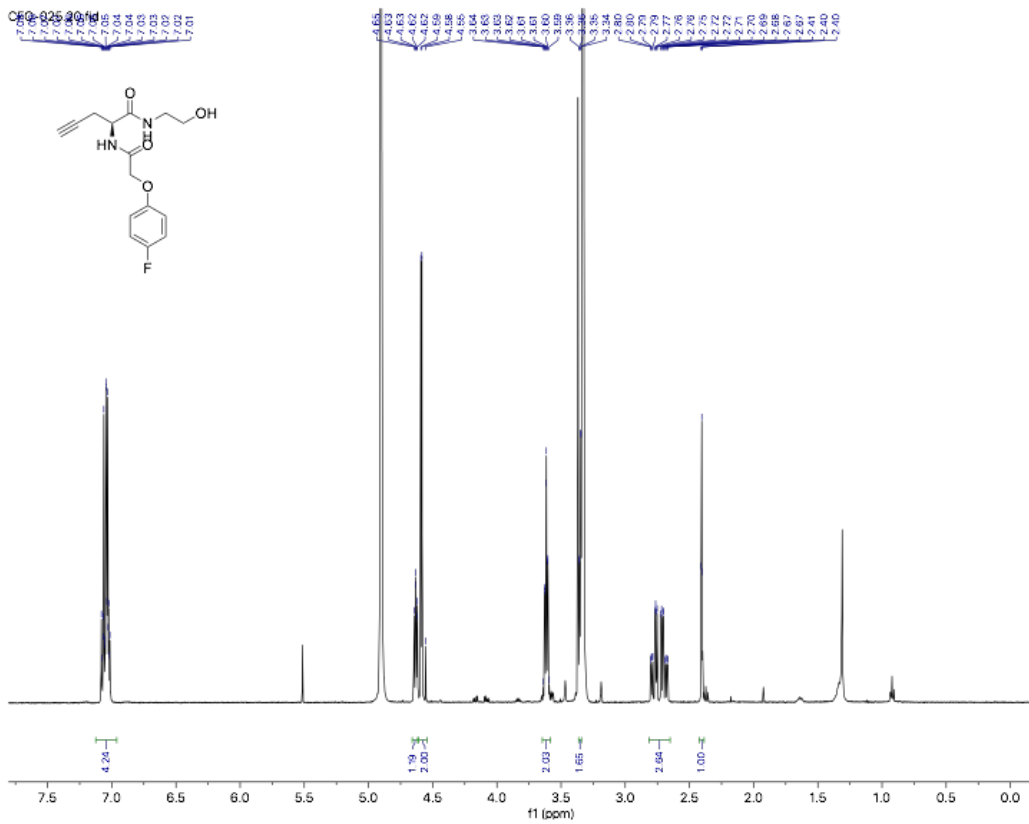

609

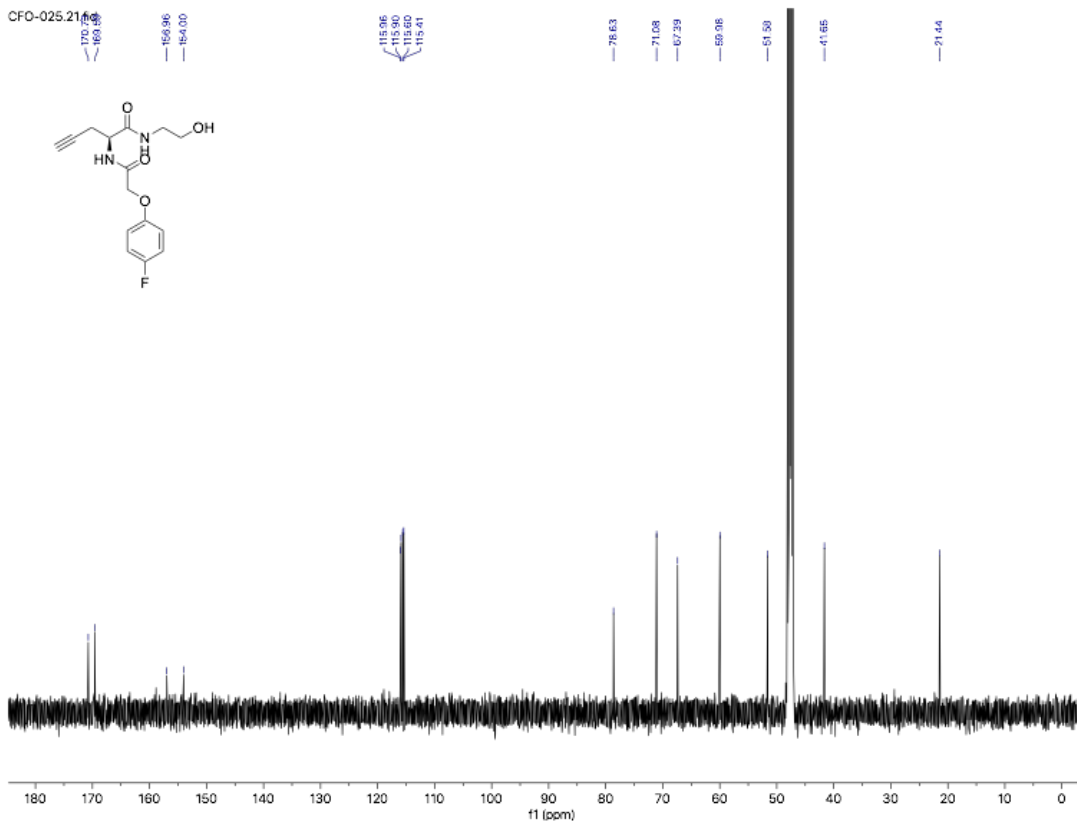

610



611

CFO-027.10.fid

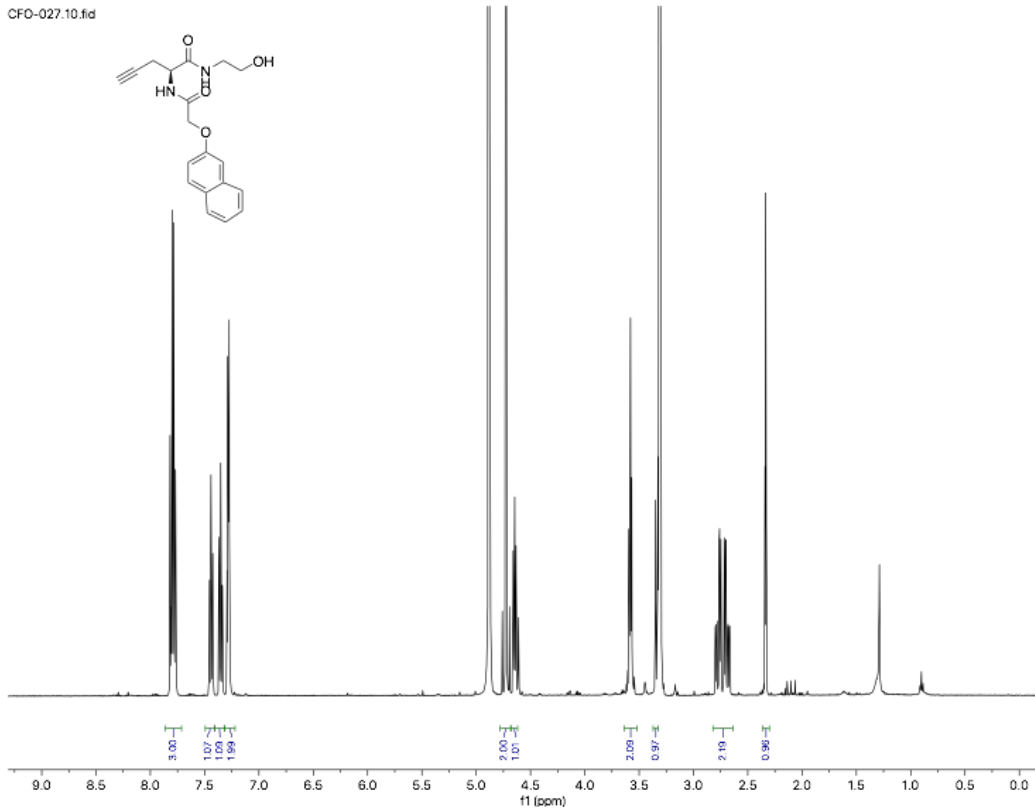

612

CFO-027.12.fid

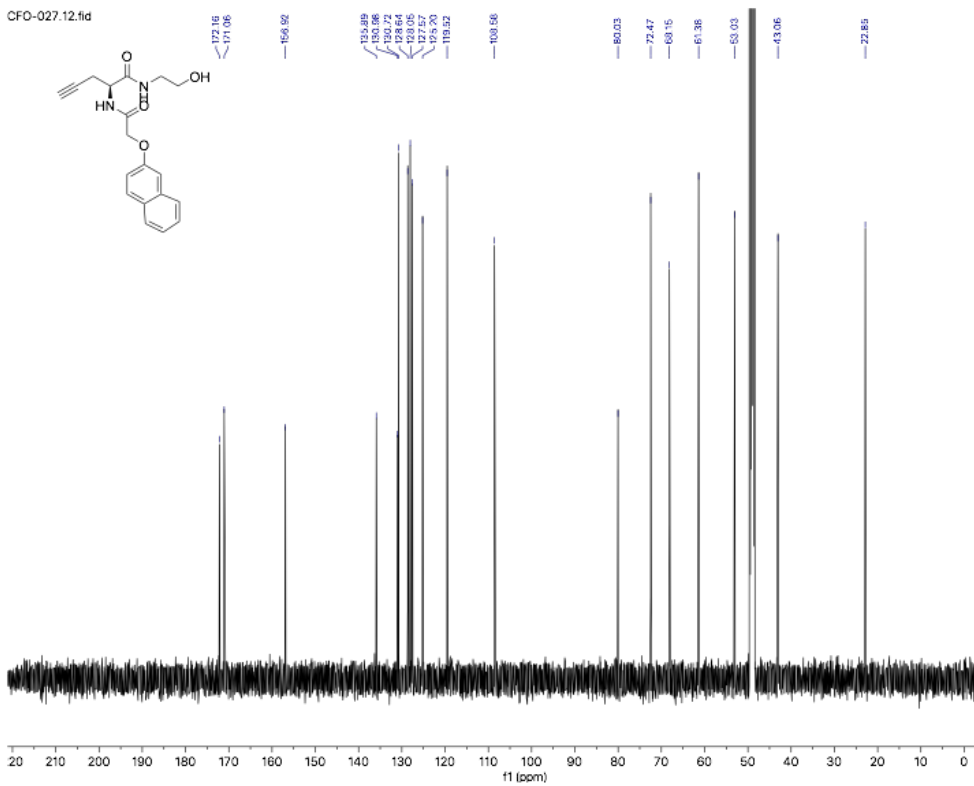

613

ES\_CFO\_28.10.fid

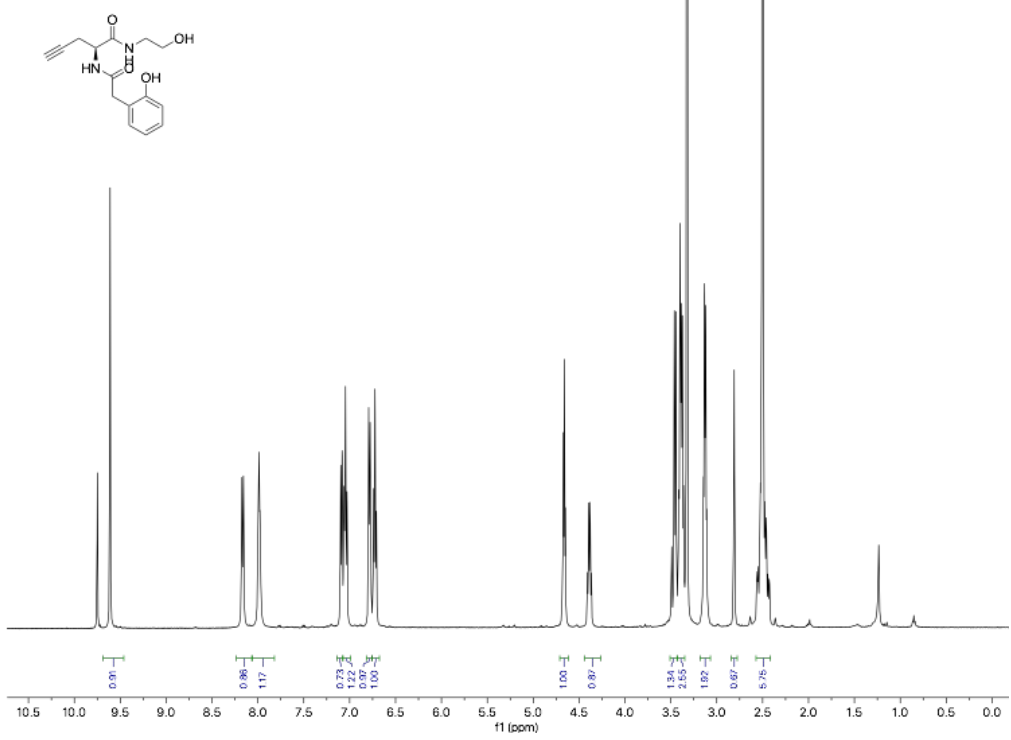

614

ES\_CFO\_28.11.fid

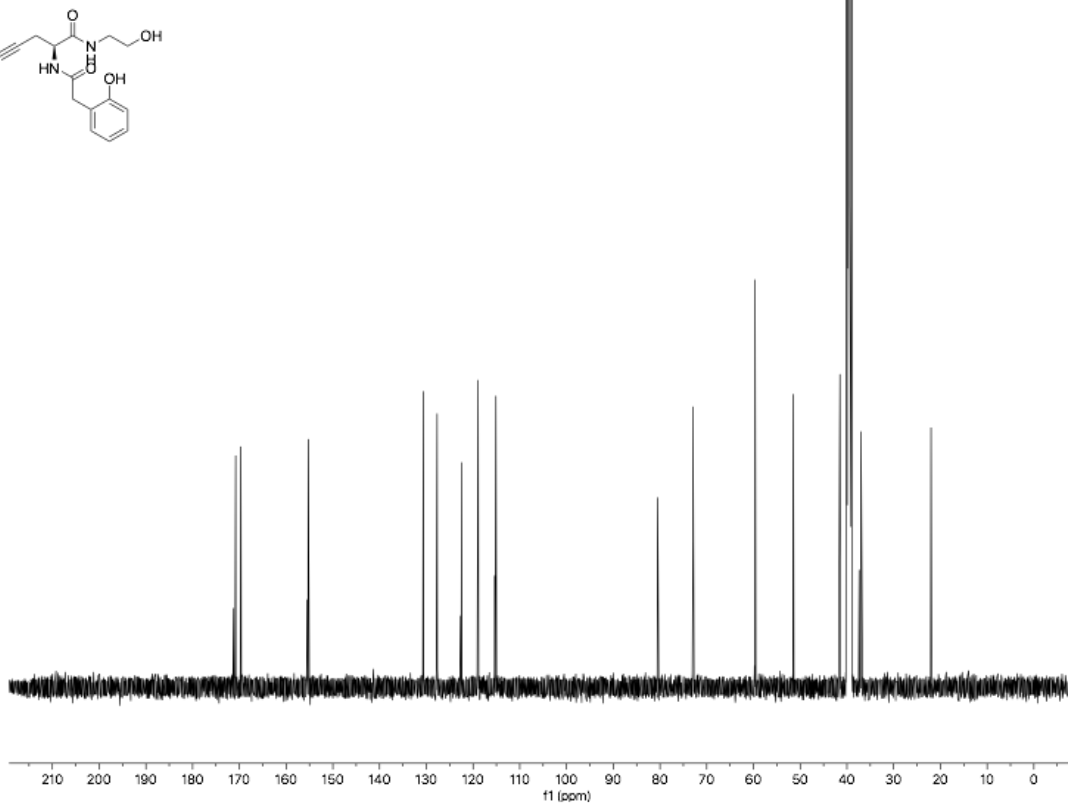

615

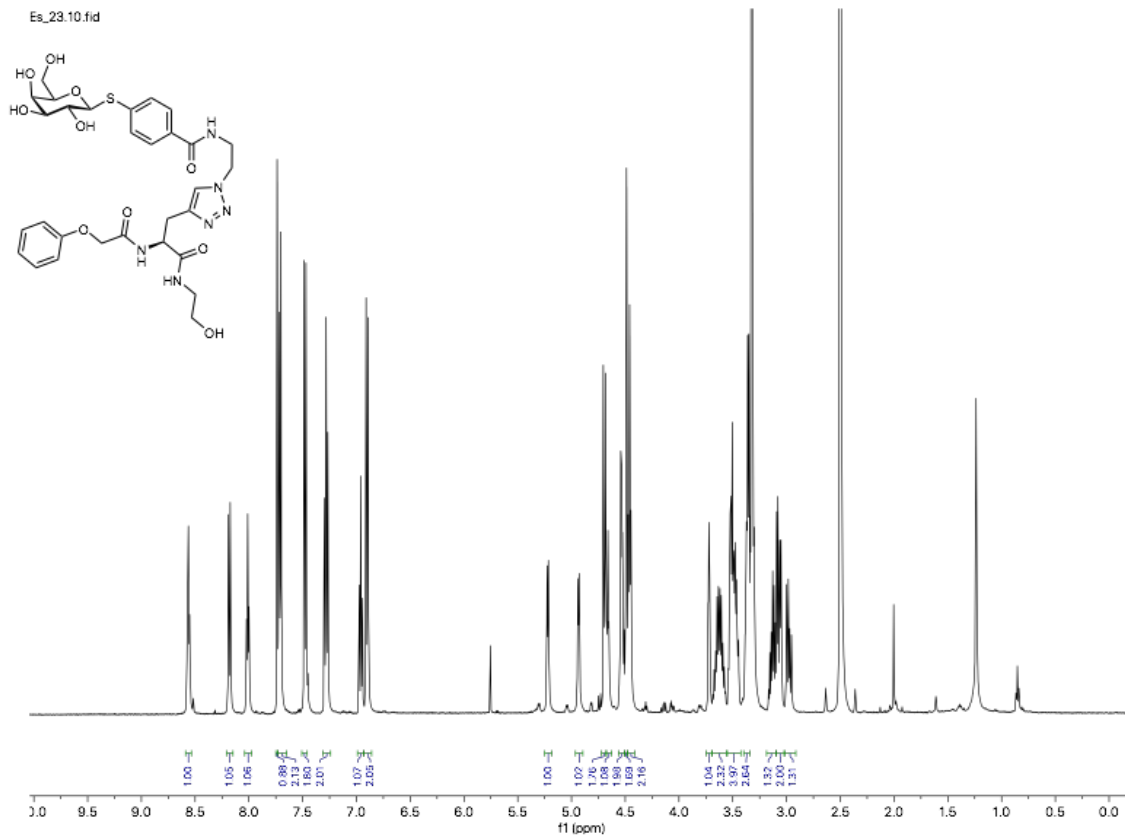

616

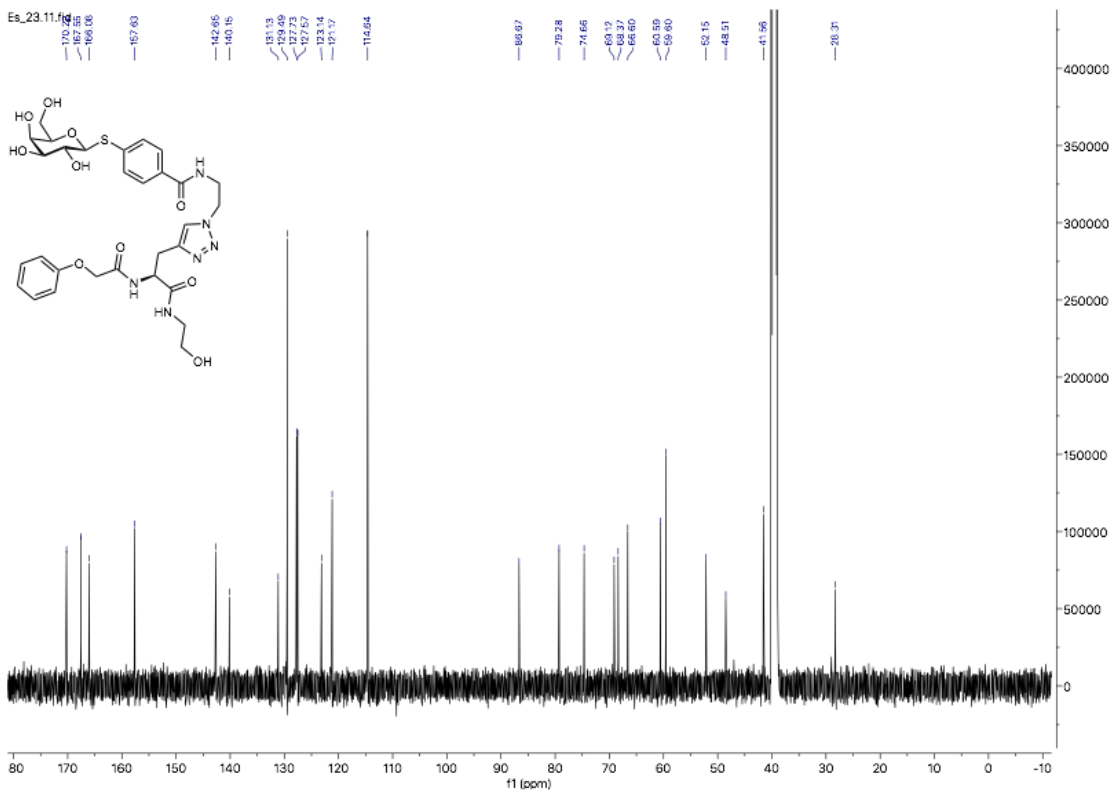

617

618

ES-59.10.fid

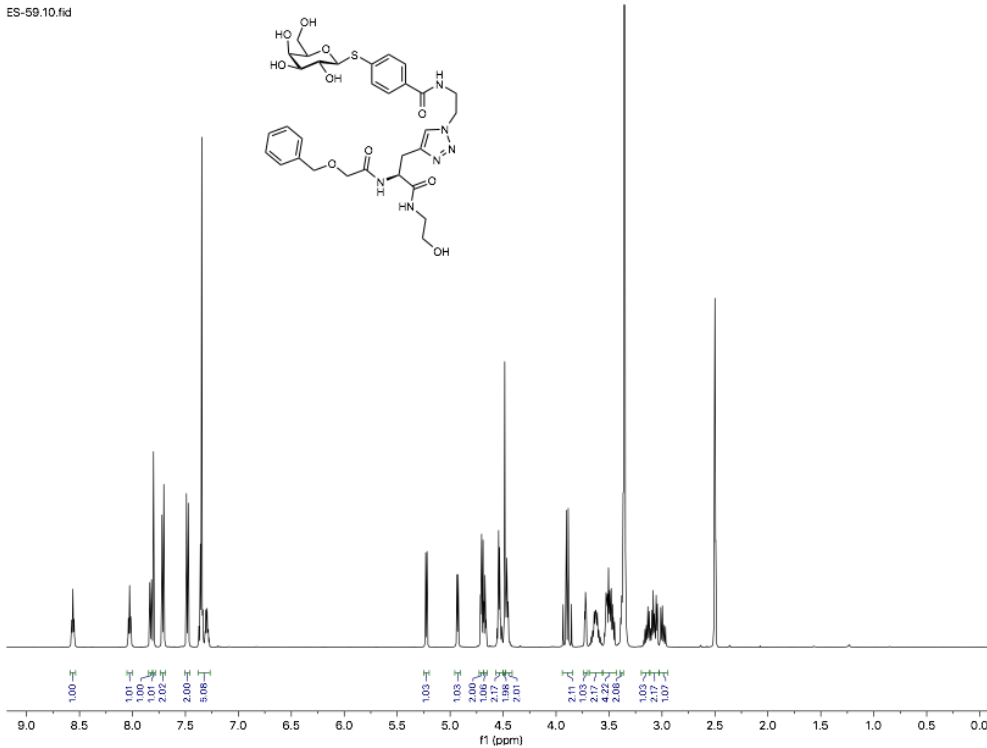

619

ES-59.12.fid

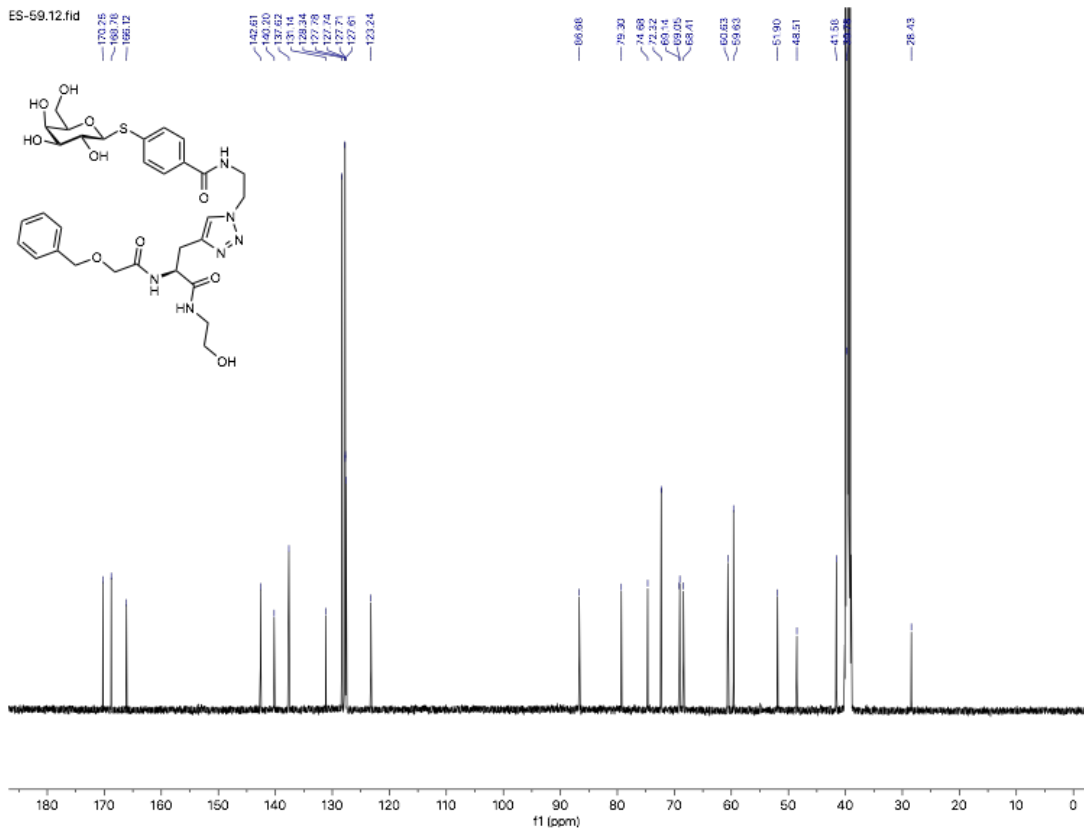

620

60

ES\_77.10.fid

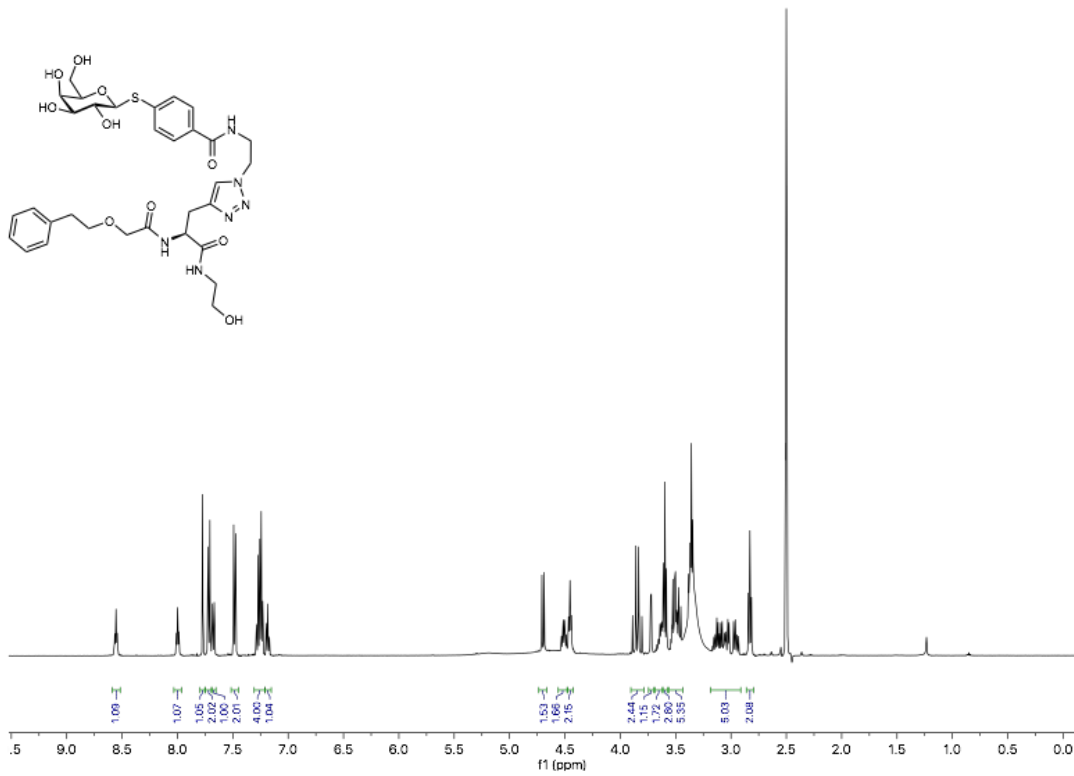

621

ES\_77.11.fid

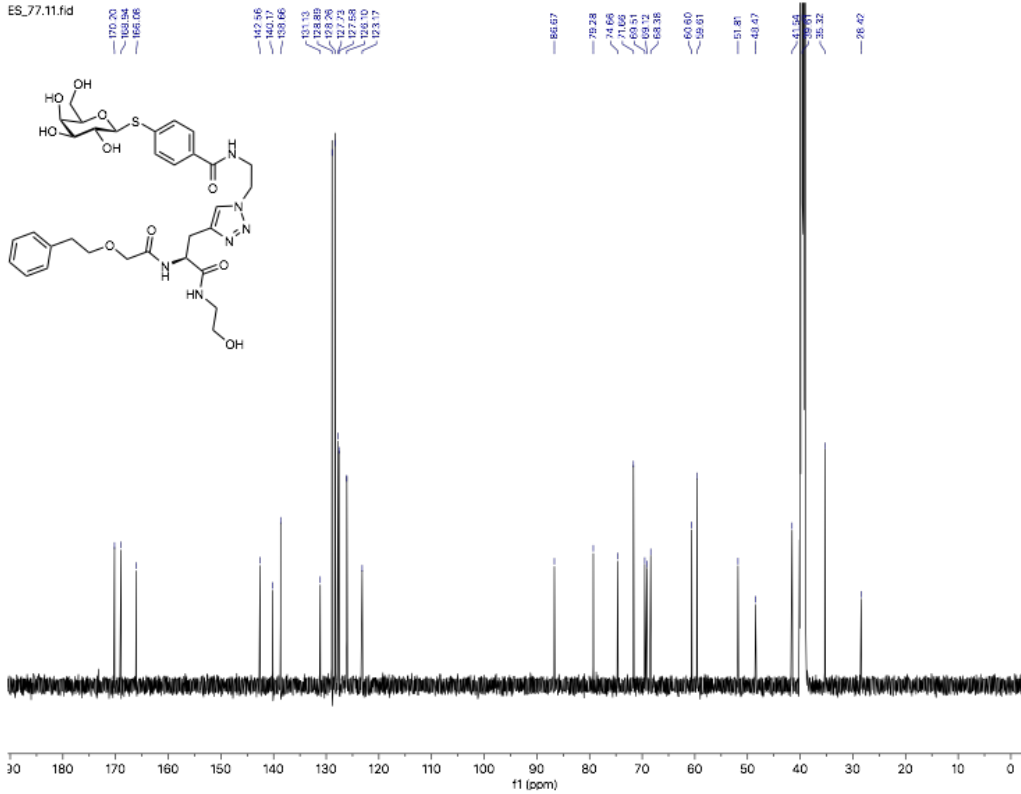

622

ES\_78.10.fid

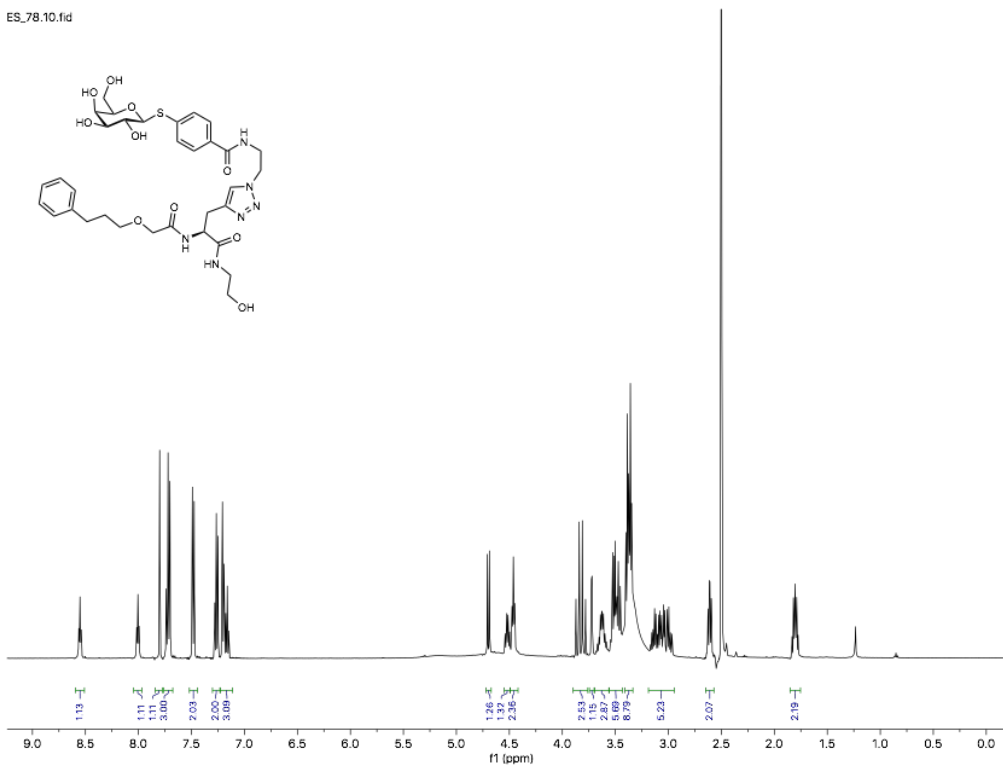

623

ES\_78.12.fid

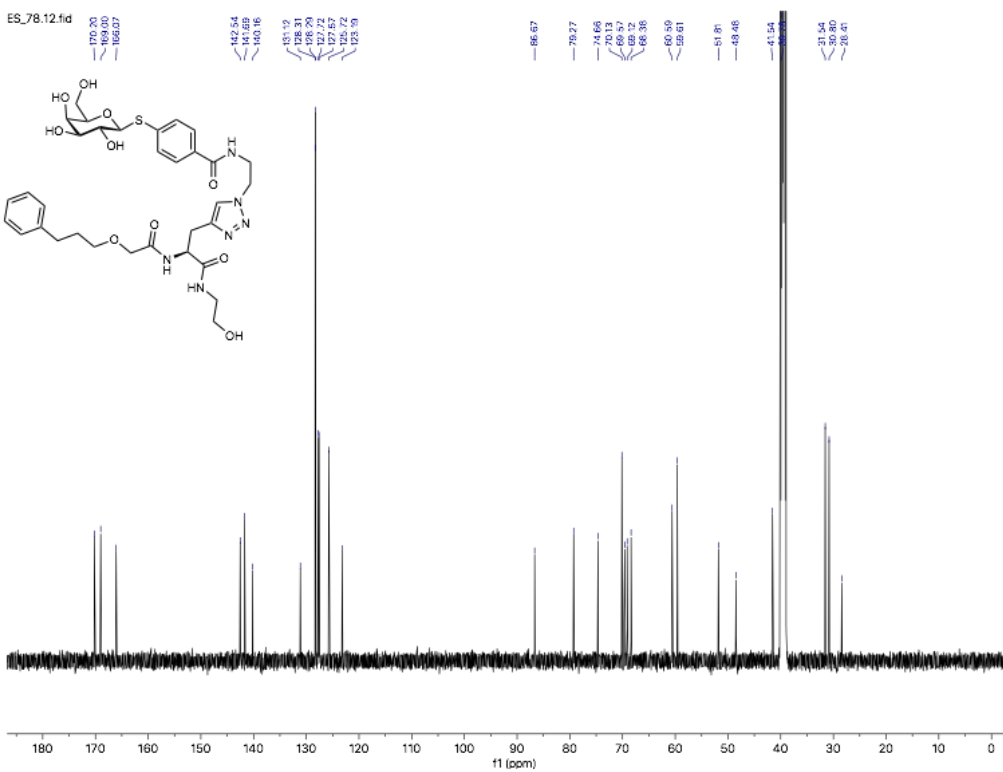

624

ES\_81.10.fid

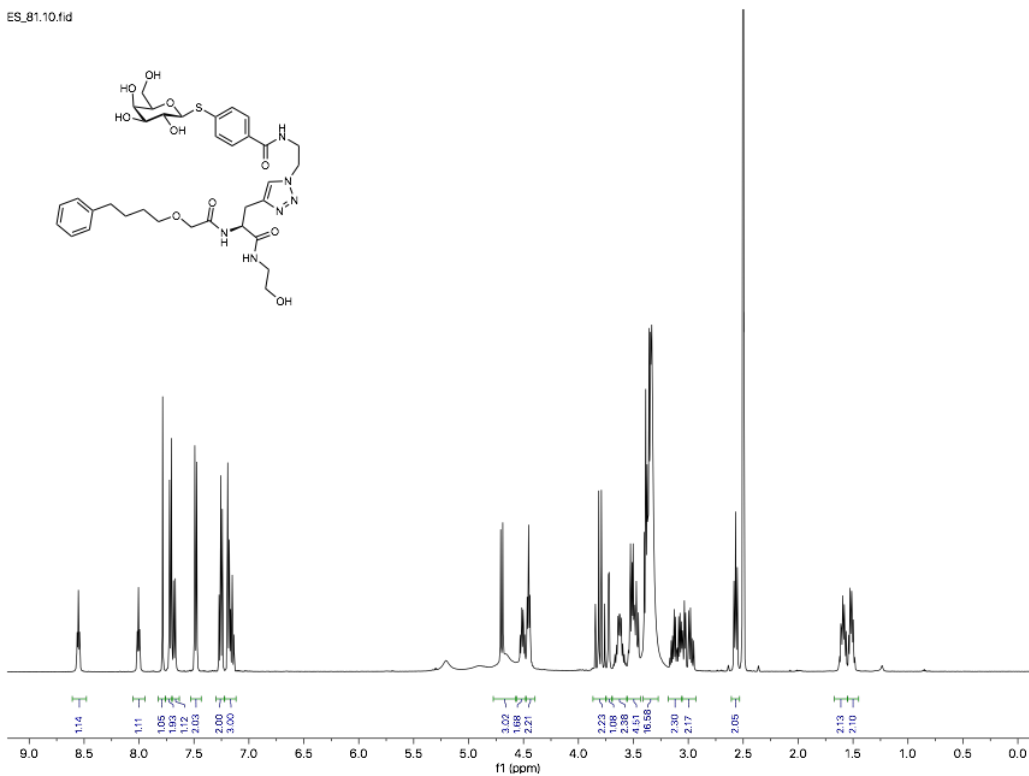

ES\_81.12.fid

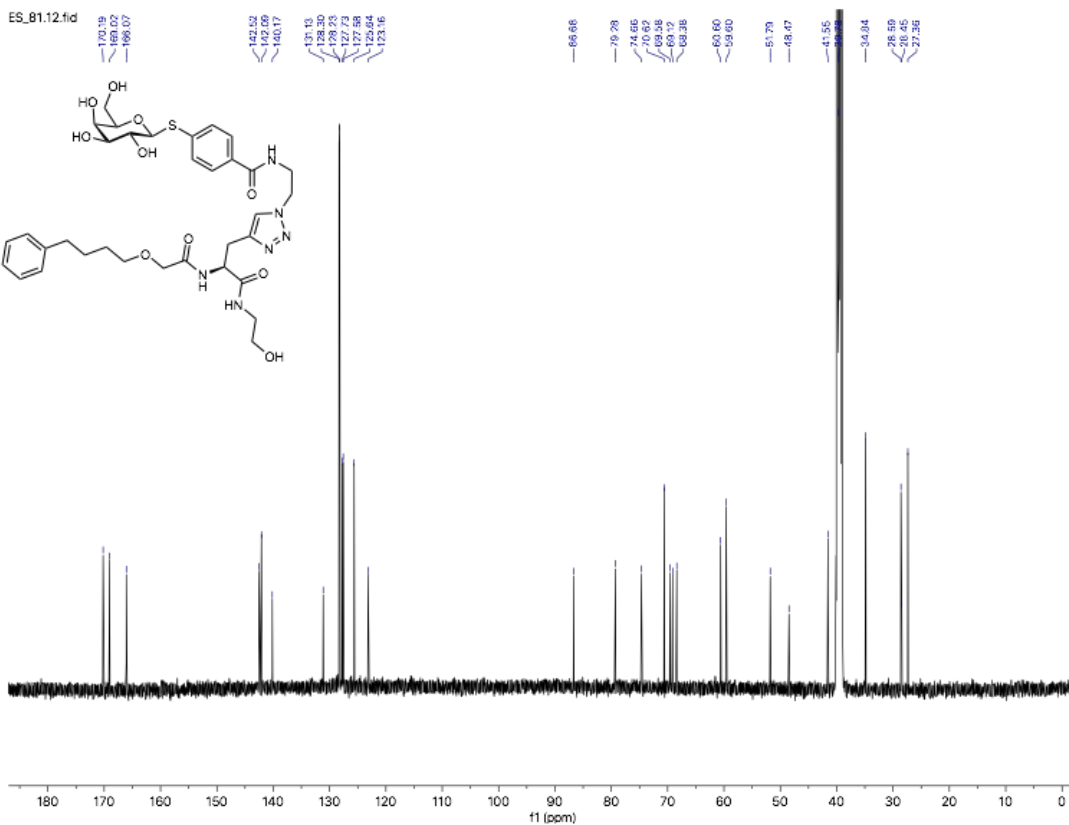

ES-54.10.fid

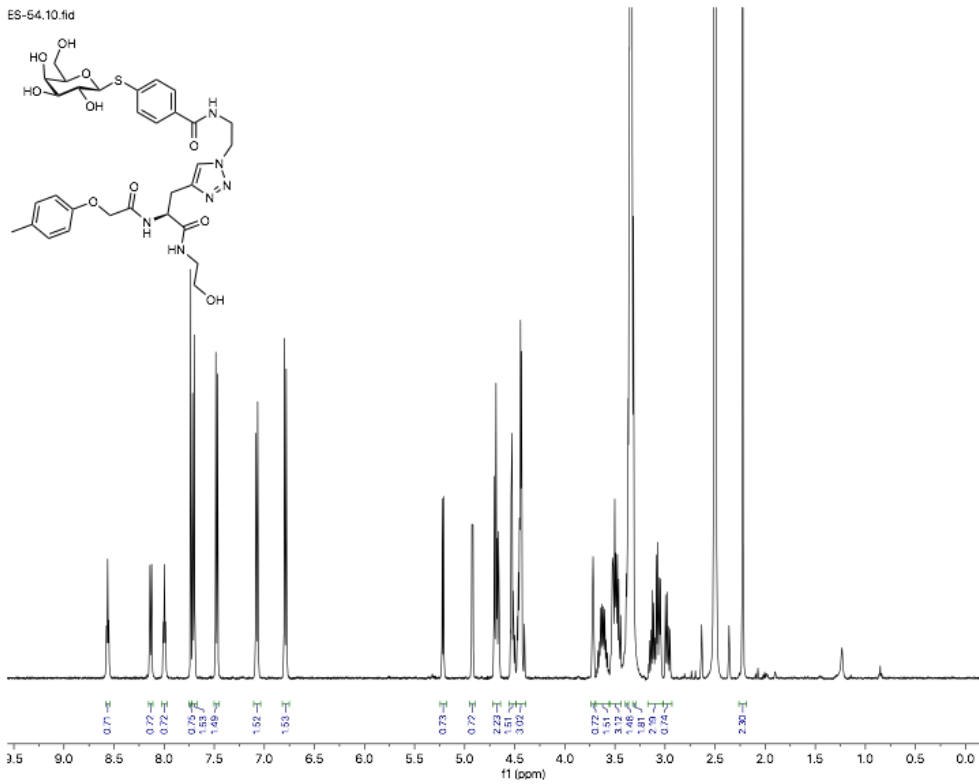

627

ES\_54.12.fid

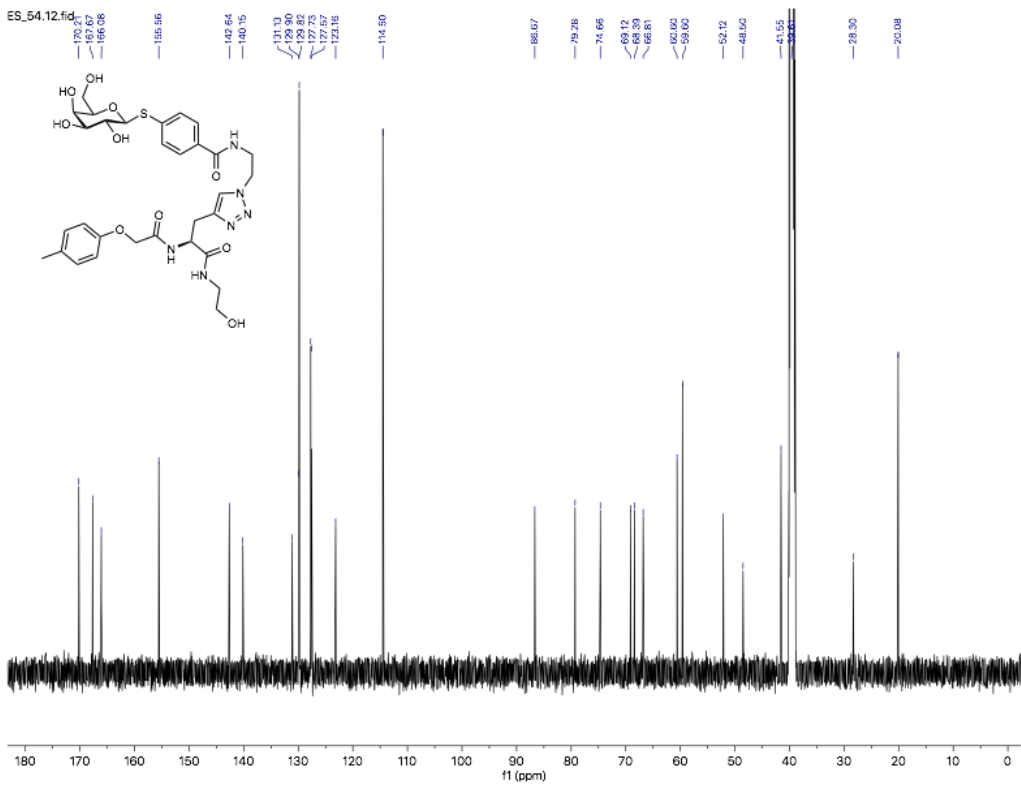

628



ES-57.10.fid

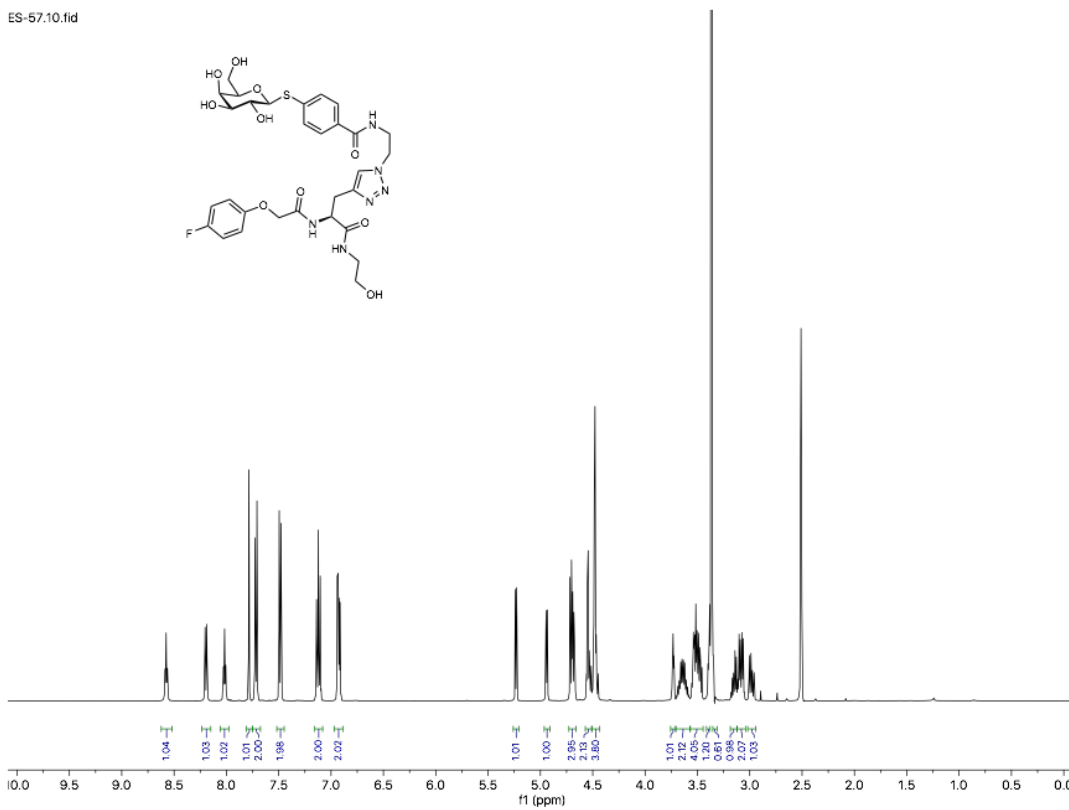

629

ES-57.12.fid

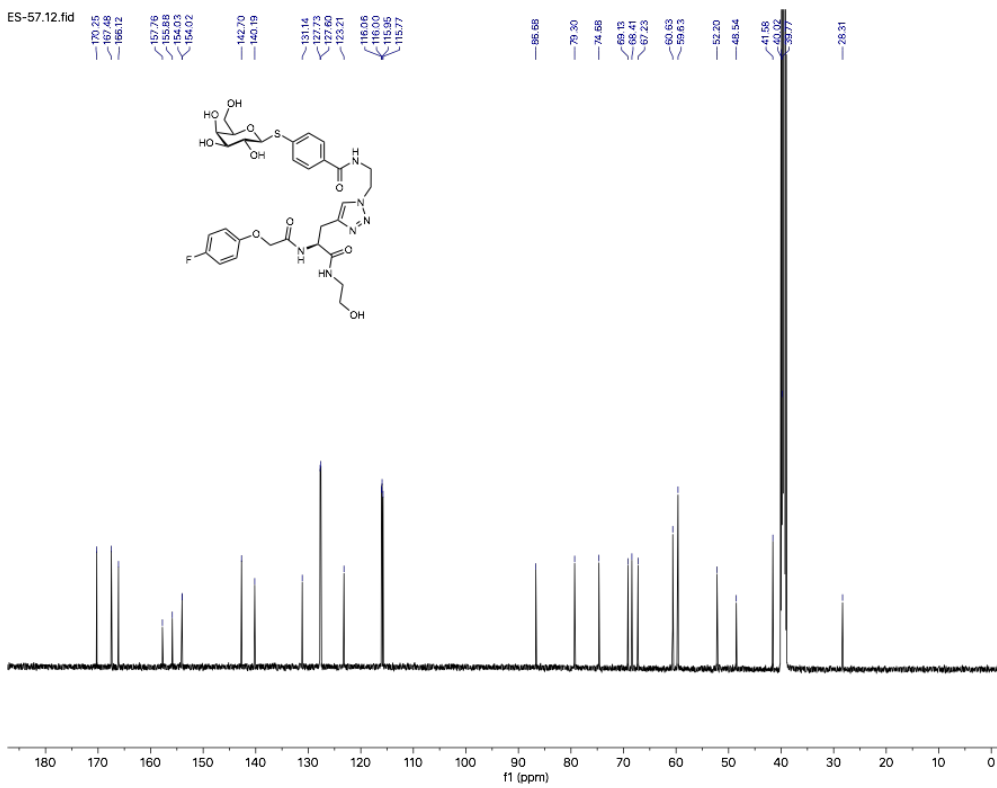

630

ESI-055\_tube31.10.fid

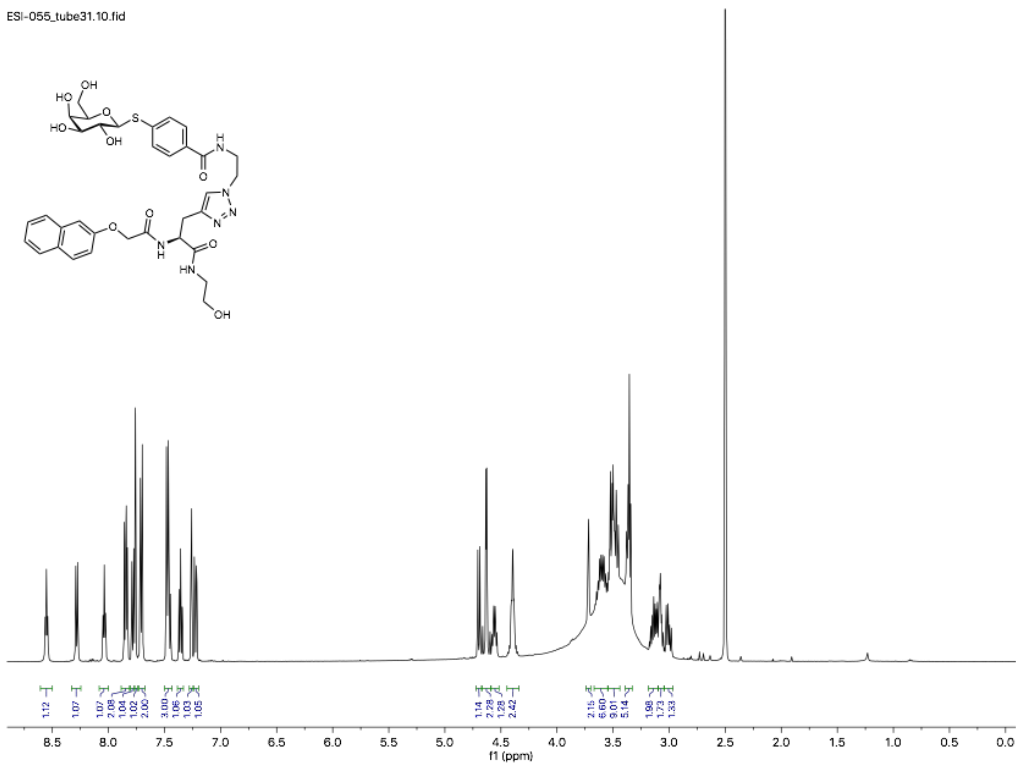

631

ESI-055\_tube31.12.fid

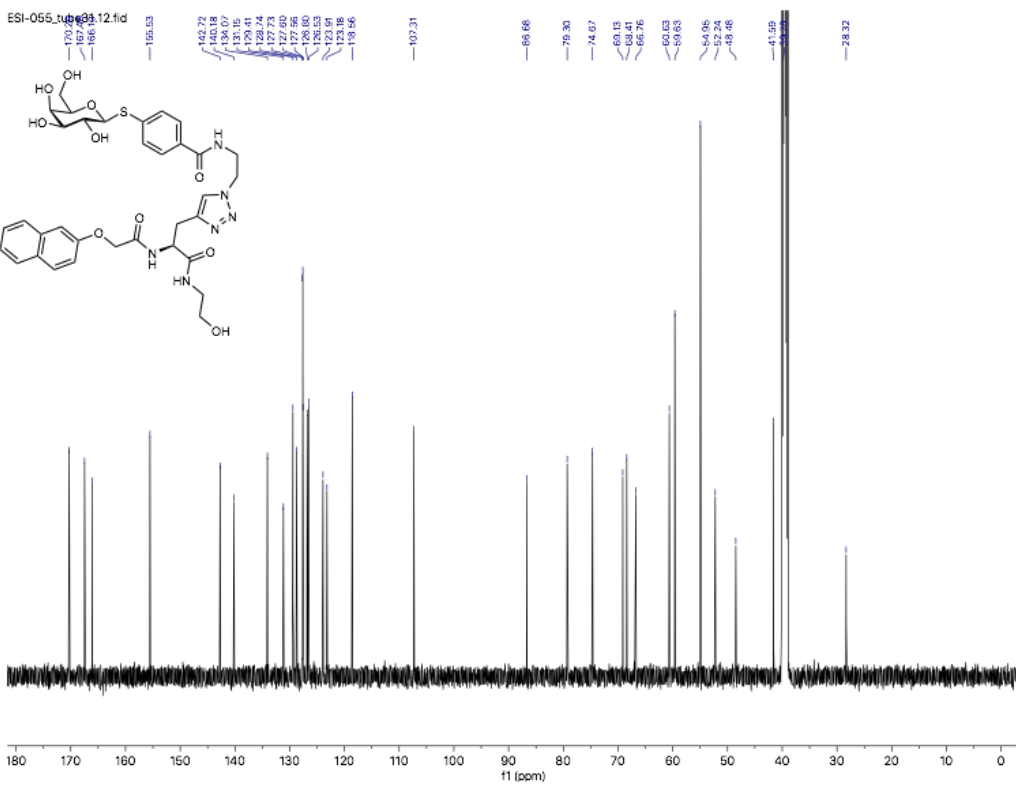

632

ES-56.10.fid

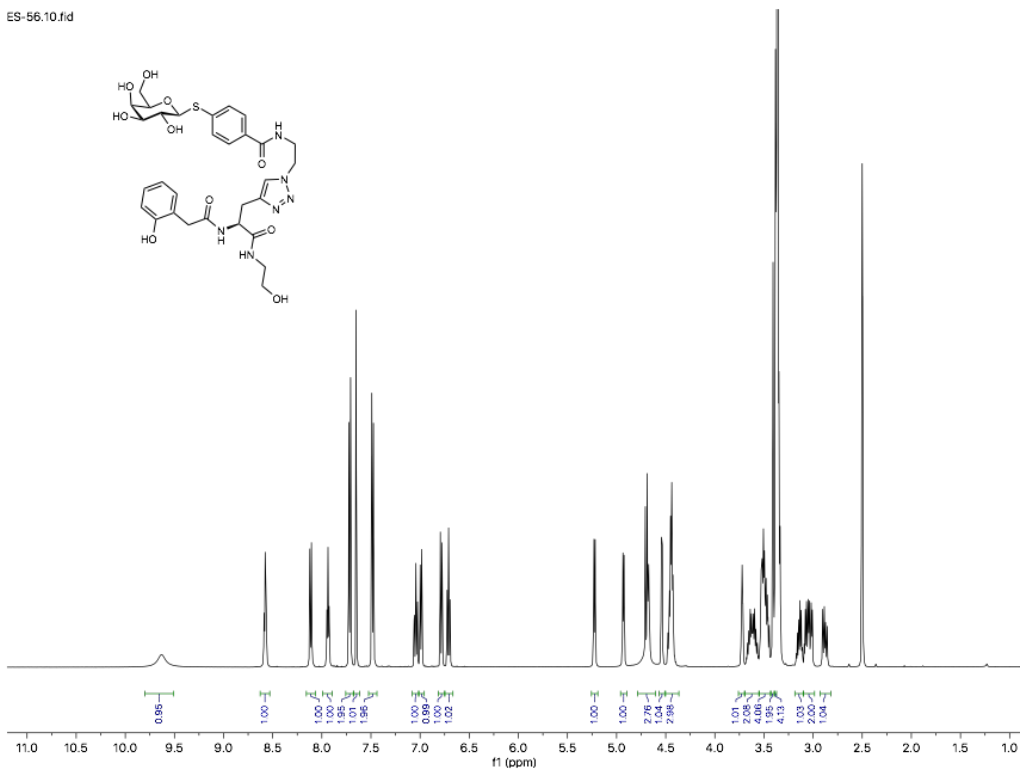

633

ES-56.12.fid

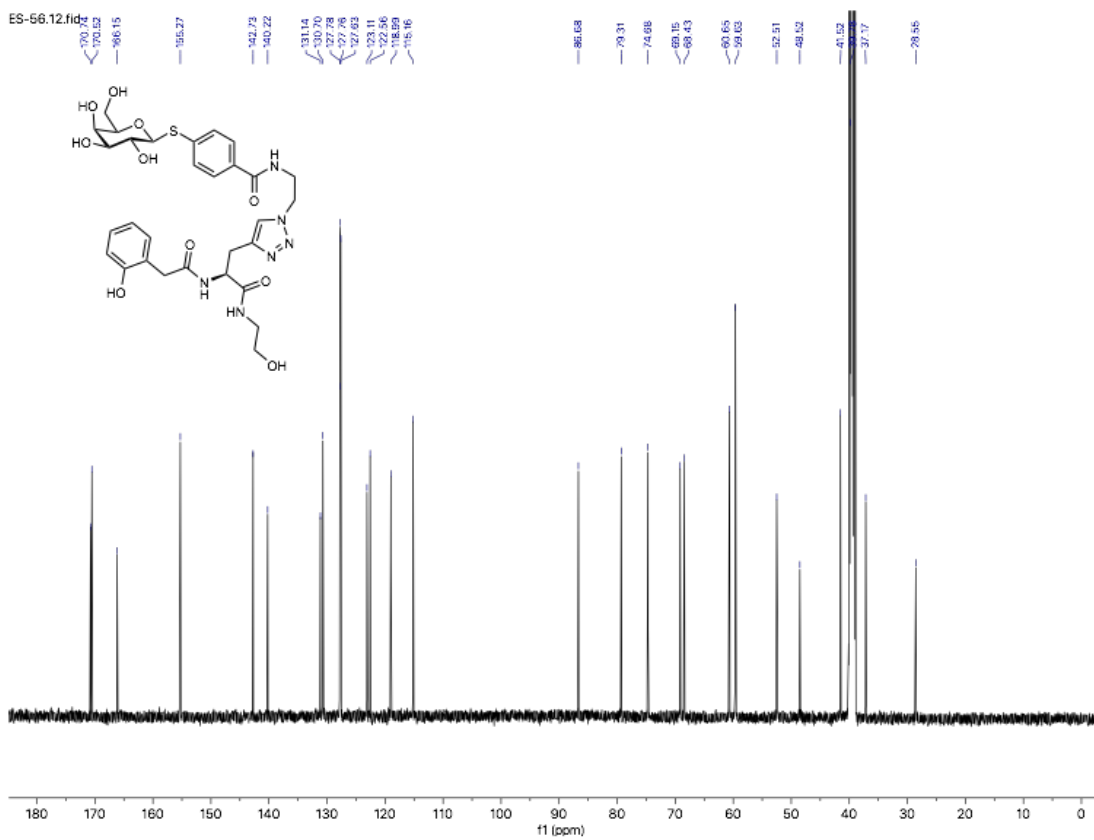

634
